# Supplementary material for: Predicting loss of hepatitis B surface antigen and evaluating the durability of functional cure induced by pegylated interferon alpha: insights from a real-world study
Source: PeerJ. 2026 Jan 21;14:e20587. doi: 10.7717/peerj.20587 (PMC12831512; doi:10.7717/peerj.20587)
Supplement: Supplemental Information 2 [file peerj-14-20587-s002.xlsx]

## Sheet: data
ID-24 week	Response	SEX	AGE	age>50y	NAs	Cirrhosis	Fatty liver	Splenomegaly	HBsAg	HBsAb	HBeAg	HBeAb	HBcAb	DNA	RBC	PLT	LYM	AST	ALT	Y-GT	TBIL	IBIL	TP	Alb	eGFR	UA	12HBsAg	12HBsAb	12HBeAg	12HBeAb	12HBcAb	12DNA	12WBC	12RBC	12PLT	12LYM	12AST	12ALT	12Y-GT	12TBIL	12IBIL	12TP	12Alb	12eGFR	12UA	cHBsAg	cHBcAb	cAST	cALT
1	0	0	24	0	0	0	0	0	16500	0.01	100.67	0.2	86.17	3.16732				22	15	12	11.1	6.8	82.3	49.1	128.8	296.7	12520	0.01	94.86	0.01	94.3	0	1.73	3.7	54	0.7	138	104	65	9.3	4.1	74	44.2			0.11988	0.0391556	116	89
2	0	1	24	0	0	0	0	0	14305	0.01	79.88	0.11	61.69	3.94939	5.89	217	2.31	50	83	28	14.6	10	82.3	53.1	98.1	406	16500	0.01	98.61	0.09	100.96	2.5302	12.95	5.33	198	1.59	21	31	22	16.3	10.8	78.4	48.1	114.9	299.8	-0.0619961	0.213935	-29	-52
3	0	1	24	0	1	0	0	0	1270	0.01	6.39	1.87	108.8	0	4.98	93	1.99	24	19	14	6.6	3.3	65.1	40.1	111.6	273.3	1161	0.25	2.58	1.65	30.26	1.86688	4.4	4.51	91	1.44	32	27	19	7.2	3.9	64	42.9	108.2	282.4	0.0389715	-0.55576	8	8
4	0	1	24	0	1	0	1	0	32.41	3.16	0.01	224.13	181.12	0	5.2	268	3.06	18	43	69	6.3	3.3	72.3	48.3			5.29	5	0.01	146.05	107.88	0	4.67	5.06	114	1.32	33	21	130	13	6.9	71.1	46.1			0.787223	-0.225025	15	-22
5	0	0	26	0	1	0	0	0	16500	0.01	0.73	1.44	103.29	0				14	11	14	20.6	13.3	79.3	50.4	117.4	251.2	16500	0.01	0.53	1.36	180.06	0	1.72	4.12	78	0.91	39	53	67	16.6	10.4	78.1	47.9			0	0.241359	25	42
6	0	0	26	0	0	0	0	0	16500	1.61	83.25	0.23	100.92	7.26717				63	95	55	7.2	3.7	90	52.5	96.6	277	5140	0.93	18.43	4.3	103.82	0	2.3	3.91	112	0.97	55	49	110	8.4	4.6	75.1	42.9			0.506521	0.0123038	-8	-46
7	0	1	27	0	0	0	0	0	1608	0.01	0.01	294.13	213.06	2.36549				18	17	17	15.5	10.2	77.6	52.9	104.7	541.6	2323	2.14	0.01	266.28	173.2	0	5.8	5.46	193	1.36	20	26	21	10.1	5.6	74.7	50	109.2	512.7	-0.159763	-0.089954	2	9
8	0	0	28	0	0	0	0	0	686	7.19	0.01	207.32	121.26	3.68305				15	11	12	18.1	11	82.6	46.4	121		663	2.17	0.01	264.27	150.23	0	1.83	3.4	117	0.74	31	39	25	11	5.6	69.1	40.4	127.8	257.9	0.0148106	0.0930391	16	28
9	0	1	28	0	0				16500	0.01	0.01	160.78	75.66	0													5728	0.01	0.01	219.81	155.81	0	2.26	4.49	121	1.08	52	96	67	16.1	9.1	73.1	46.1	117.6	258.5	0.459481	0.313729	#VALUE!	#VALUE!
10	0	1	28	0	0		1		16500	0.01	96.41	0.58	86.17	0													10464	0.01	101.52	0.52	191.36	2.63949	2.36	5.07	126	1.01	49	82	114	9.6	5.2	82.8	45	118.7	430.8	0.197786	0.346495	#VALUE!	#VALUE!
11	0	1	29	0	0				1125	0.01	0.01	80.08	133.12	2.38739	4.8	345	2.63	23	22	55	6.2	3.3	80.1	45.3	94.7	406.5	141	0.01	0.01	387.61	177.74	0														0.901933	0.125542	#VALUE!	#VALUE!
12	0	1	29	0	1	0	1	0	16500	0.01	0.01	157.28	144.42	0	5.47	265	2.35	24	25	70	4		75.6	46.1	118.5	360	8443	0.01	0.01	141.2	109.48	0	5.1	5.63	184	2.24	28	47	53	7.5		75.5	48.3	112.5	364.5	0.290987	-0.120293	4	22
13	0	1	29	0	1	0	0	0	1147	0.01	0.01	168.19	174.89	0	5.06	131	35.7	25	38	32	18.5	11.2	75.9	49.2			77.17	0.01	0.01	179.11	174.5	0	2.57	4.98	89	0.97	34	55	72	12.8	7	73.2	49.1	115.3	317.8	1.17211	-0.000969546	9	17
14	0	1	29	0	0	0	1	0	2665	0.1	0.01	2.66	120.77	2.71181				26	40	38	13.9	9.4	78.9	52	97.8	489.4	1874	0.74	0.01	1.9	200.15	2.44091	2.7	5.43	118	1.23	91	147	158	14.4	7.9	73.9	48.5			0.152928	0.219397	65	107
15	0	1	29	0	0	0	0	0	8863	0.01	0.01	73.82	43.13	4.14613	5.97	213	1.84	25	31	19	10.4	6.8	80.5	49.8	115.6	304	6836	0.01	0.01	196.66	123.78	2.20952	7.77	5.26	223	2.08	25	34	21	9.6	5.5	72.5	46.7	120	299	0.112779	0.457871	0	3
16	0	1	29	0	1				555	5.74	0.13	6.88	308.84	1.93247													799	6.58	0.01	6.06	133.09	2.28556														-0.158254	-0.365588	#VALUE!	#VALUE!
17	0	1	30	0	0	0	0	0	3269	0.01	0.01	12.15	164.85	3.1038				22	29	29	10.3	6.5	79.8	48.9			14.13	0.01	0.01	4.58	109.92	0	3.69	5.67	1100	1.33	214	345	95	11.2	5.8	73.8	45.9	102.5	494.5	2.36427	-0.176012	192	316
18	0	0	30	0	0	0	0	0	16500	0.01	76.45	0.1	85.46	0	5.09	230	1.51	56	65	54	5.8	3.4	72.5	42.9	114.1	333.5	16500	0.01	118.26	0.5	165.8	0	2.37	4.84	150	1.12	58	48	89	8	5.3	70.4	43.6			0	0.287822	2	-17
19	0	1	30	0	1				1481	0.01	0.01	6.04	195.78	0				21	28	43	15.1	10.4	79.4	48.6			21.81	0.01	0.01	3.31	122.51	0	3.64	4.63	141	1.19	41	51	90	9	5.1	74.1	46.8			1.8319	-0.203597	20	23
20	0	0	30	0	0	0	0	0	470	0.01	0.01	17.06	55.15	0				26	20	12	15	9.8	75.7	46.8			996	0.01	0.01	30.7	158.77	0	2.6	4.69	111	1.04	53	34	22	13.6	7.7	75.8	44	124	362	-0.326161	0.459223	27	14
21	0	0	30	0	1	0	1	0	2633	0.01	0.01	170.97	105.18	0	4.06	210	1.14	23	22	10	9.5	5.4	73.6	46.1								0														#NUM!	#NUM!	#VALUE!	#VALUE!
22	0	1	30	0	0	0	0	0	7667	0.01	0.11	2.19	155.69	0	5.07	101	1.26	33	42	20	13.2	8.5	75.3	44.5	115.6	327	2405	0.01	0.04	1.58	27.32	0	3.17	4.49	73	0.82	54	73	32	18.3	11.7	70.9	45.2			0.50351	-0.75578	21	31
23	0	1	31	0	0	0	0	0	4617	4.1	0.01	162.16	56.6	4.18184				16	16	17	12.9	7.7	76.8	45.2			6852	0.01	0.01	118.52	113.89	2.19866	3.36	5.09	123	1.47	41	54	24	13.5	9.1	74.6	44.4			-0.171457	0.303669	25	38
24	0	1	31	0	0	0	0	0	1367	6.11	105.92	0.01	175.47	0				20	23	17	10.8	6.9	78	49.1			94	8.04	56.42	1.02	184.43	0	3.14	4.64	161	1.65	39	47	91	72.7	48	72.7	48			1.16264	0.0216287	19	24
25	0	0	31	0	0	0	0	1	226.71	0.01	0.01	2.12	81.57	2.84323				19	15	11	10.2	6.4	75.1	46.4			15.96	0.01	0.01	2.14	128.28	0	2.33	4.23	72	1.1	254	75	109	9.6	5.1	69.7	45.1			1.15244	0.196628	235	60
26	0	0	31	0	0	0	0	0	2885	0.01	0.51	1.7	43.67	0	4.49	251	1.62	19	16	16	6.9	4.6	82.6	49.3	118.3	275.3	1060	0.01	0.45	1.67	120.04	0	1.93	3.95	116	0.77	39	45	27	6.6	3.7	81	47.2	121.9	261.6	0.43484	0.439143	20	29
27	0	1	32	0	0	0	1	0	3785	0.01	0.01	3.68	136.54	0	5.66	136	1.6	22	27	26	9.8	6.1	71.3	46.9	102.5	319.9	4464	0.01	0.01	2.18	200.71	2.44404	2.62	5.21	87	1.13	33	40	44	8.6	5.1	69.6	47	107	286.7	-0.0716583	0.167309	11	13
28	0	0	32	0	1	0	0	0	4051	0.01	0.01	93.82	174.5	0													2593	0.01	0.01	101.04	235.77	0														0.19376	0.130693	#VALUE!	#VALUE!
29	0	1	32	0	1	0	0	0	7719	4.26	0.56	1.78	150.32	0	5.14	182	1.93	18	16	24	19	13.1	80.6	51.1	97.6	290	6706	1.53	0.21	1.8	184.72	0	2.79	4.63	78	1.04	90	138	92	14.4	8.2	72.2	45			0.0610975	0.0894972	72	122
30	0	0	32	0	0	0	0	0	1382	0.01	0.01	162.66	153.71	4.57403	4.54	248	2.5	15	11	12	6.6	3.9	72.4	45.4	122.6	179	816	0.01	0.01	67.05	47.39	2.60638	2.18	4.27	108	1.2	58	18	53	6.9	3.4	67.8	42.7	173		0.228818	-0.511015	43	7
31	0	0	32	0	1				1742	0.01	0.83	1.43	1.88	0	4.22	259	2.57	12	5	12	19.6	12.9	75.1	51.4			2821	1.83	1.62	1.37	1.64	0	3.03	3.69	140	0.95	36	34	33	9.7	5.5	72.4	45.2	101.9	328.2	-0.209355	-0.059314	24	29
32	0	0	32	0	1				5.65	2.46	18.16	2.2	84.56	4.64345	4.48	108	0.94	25	19	29	6.3	4.1	76.8	44.7			1.19	4.45	3.03	168.14		0	1.86	4.18	80	0.51	267	157	163	12.9	7.2	76.3	45.4	121.7	236.3	0.676501	#NUM!	242	138
33	0	1	32	0	0	0	0	0	16500	0.01	93.73	0.01	108.16	8	5.7	198	3.09	24	30	22	15.2	10.5	74.6	49.9	99.7	498.7	16500	0.01	90.99	0.01	46.66	4.04139	3.29	5.01	131	1.34	48	61	69	12	5.9	70.1	45.1	101.1	514.7	0	-0.365122	24	31
34	0	0	33	0	0	0	0	0	7632	0.01	0.01	137.04	134.19	0													3153	0.01	0.01	119.04	109.52	0	2.73	4.07	128	1.27	42	41	33	14.8	9	73.3	46.8			0.383914	-0.0882267	#VALUE!	#VALUE!
35	0	0	33	0	0	0	0	0	1860	5.07	0.01	159.38	62.18	0													1229	0.01	0.01	190.19	137.07	2.43616	3.14	4.2	80	1.36	45	30	13	6.1	3.3	84.5	47.7	120.2	245.8	0.179961	0.343292	#VALUE!	#VALUE!
36	0	1	33	0	1	0	1	0	1887	0.01	0.01	93.91	214.84	0				20	26	21	9.1	5.3	74.3	46.3	117.2	331	1646	1.3	0.01	23.62	76.65	0	3.08	4.17	142	1.46	32	41	40	15.2	9.3	70.5	45.4	120.8	302	0.0593421	-0.447603	12	15
37	0	1	33	0	0	0	0	0	291	0.01	0.01	219.71	168.17	0													212	0.01	0.01	72.36	121.22	0	5.73	4.71	176	2.7	20	27	26	23.5	16.2	74.6	47.1			0.137557	-0.142174	#VALUE!	#VALUE!
38	0	1	33	0	0	0	1	0	292	0.01	0.01	179.47	115.64	0	5.61	210	1.98	22	17	23	13	8.7	78.4	48.6	113.3	379.9	39.97	0.01	0.01	171.14	123.24	0	2.28	4.3	101	0.88	63	96	119	17.4	9.6	73.8	45.5			0.863649	0.0276436	41	79
39	0	1	33	0	0	0	0	0	305	0.01	0.01	153.29	121.56	6.19312				24	28	20	17.6	12	76.5	49.7	117.3	359	16.04	0.36	0.01	137.34	116.41	2.35025	3.28	4.92	134	1.47	38	42	37	11.7	7.4	78	46.2	118.6	364	1.2791	-0.0188004	14	14
40	0	1	33	0	0	0	0	1	813	0.01	0.01	2.86	98.33	0													172	0.01	0.01	1.77	44.37	0	2.27	5.39	58	0.76	82	92	51	14.1	8	74.1	46.9	107.8	320	0.674562	-0.345597	#VALUE!	#VALUE!
41	0	1	33	0	0				60.82	0.01	0.01	115.85	144.5	3.54407	5.27	215	2.29	20	19	16	11.1	7.1	78.9	47.5	113.2	351.7	23.68	0.01	0.01	190.75	200.94	0	3.54	5.18	98	1.41	77	119	132	7.5	4	77	46	113.2	341.3	0.409665	0.143199	57	100
42	0	0	33	0	1	0	0	0	16500	0.01	81.58	0.16	29.59	0				22	13	13	13.1	8	78.9	46.4			16500	0.01	60.39	1.29	475.75	0	2.51	3.99	168	1.11	83	33	48	12.2	6.5	70.1	42.8			0	1.20623	61	20
43	0	0	33	0	0				157	0.94	0.75	1.95	166.55	4.04139	4.72	233	2.85	14	12	14	8.2	5.2	73.8	47.3	116.7	262.5	22.1	5.3	0.95	2.25	106.38	0	5.4	3.97	156	1.98	31	26	52	9.8	6.1	72.8	45.4	119.4	248.7	0.851507	-0.194685	17	14
44	0	1	34	0	1		1		3964	0.01	0.01	2.46	293.15	2				33	56	53	11.5	7.2	80.7	49.8			4742	0.01	0.01	2.12	207.25	0	3.56	4.55	132	1.45	52	52	70	7.2	5.4	68.4	44.2			-0.0778279	-0.150595	19	-4
45	0	1	34	0	0	0	0	0	4929	0.01	0.01	331.92	175.91	2.68931				20	16	16	13.5	7.5	68.4	43			4714	0.01	0.01	284.32	199.76	0	1.93	4.28	63	0.84	103	97	48	11.3	4.8	66.8	40.7			0.0193692	0.055218	83	81
46	0	1	34	0	0	0	0	0	2021	0.01	0.01	109.7	55.88	3.82995				15	14	13	9.9	6.2	73.5	46			2647	0.01	0.01	97.92	78.54	0	2.84	5.07	196	0.99	41	65	40	8.6	4.5	72.3	45.5	118.6	212.5	-0.117188	0.147834	26	51
47	0	1	34	0	0	0	1	0	507.11	0.01	0.01	58.27	37.87	2.60314	5.28	180	1.83	28	33	46	6.1	3.3	76.5	50.4			212	0.58	0.01	36.65	111.46	0	3.65	4.93	136	1.07	34	51	64	8.8	4.6	75.3	49.4			0.378766	0.468824	6	18
48	0	1	34	0	1	0	1	0	2036	0.01	0.01	267.44	204.55	0				28	17	25	13.4	8.8	79.5	49.9			3607	0.01	0.01	92.91	144.15	0	2.52	4.84	110	0.95	33	42	46	9.8	6.1	74.1	47.2			-0.248368	-0.151985	5	25
49	0	0	34	0	1	0	0	0	46.64	32.16	0.01	80.23	112.15	3.40654	4.52	202	2.18	22	20	12	6.8	4.1	78.9	46.3	120.2	236	3.15	21.27	0.01	37.2	113.61	0	3.93	4.38	130	1.21	42	45	22	5.9	3	70.9	41.3	127.8	234	1.17045	0.00561728	20	25
50	0	0	35	0	0	0		0	7845	0				0													4346	0.01	0.01	127.46	160.47	0	1.86	4.08	111	0.86	63	51	52	6.3	3.1	72.1	41.8			0.256503	#NUM!	#VALUE!	#VALUE!
51	0	0	35	0	1	0	0	0	1403	0.01	0.01	100.67	387.26	2.4609	4.2	175	2.25	17	13	17	11.8	7.4	76.5	45.9	123.3	208.9	1.37	0.01	0.01	36.83	118.23	0	2.48	3.66	72	0.86	77	57	78	11.7	5.8	76	42.7	124.2	315.8	3.01034	-0.515275	60	44
52	0	1	35	0	1	0	1	0	489	0.01	0.06	2.12	113.79	0				28	59	58	8.4	5.5	79.8	48.5	120.6	410	1320	0.01	0.04	1.98	64.25	0	3.68	4.73	122	1.57	69	134	180	6.3	3.6	70.9	46	114.7	457	-0.431265	-0.248231	41	75
53	0	1	35	0	1	0	1	0	346	4.82	0.01	141.95	186.07	0	5.6	108	1.66	61	65	75	11.6	7.4	81.9	51.1	110.6	420.5						0														#NUM!	#NUM!	#VALUE!	#VALUE!
54	0	0	36	0	0	0	0	0	2529	0.01	0.01	134.97	99.37	4.14613	4.29	150	2.07	13	9	11	9.5	5.7	73.5	46.7	105.4	281.3	4077	0.01	0.01	210.92	218.04	0	2.84	3.42	92	0.97	22	18	13	6.9	4.6	69.4	40.5	116.1	237.5	-0.207392	0.341281	9	9
55	0	1	36	0	0	0	1	0	130	2.83	0.28	1	8.92	2.53656													10.25	0.01	0.01	325.85	169	1.8451	4.06	5.27	153	1.69	36	44	32	5.5	3.6	73.5	50.6			1.10322	1.27752	#VALUE!	#VALUE!
56	0	0	37	0	0					0.34				5.01703	8.32	295	1.84	17	18	19	8.9	5.7	80.6	44.6			1312	0.01	0.01	163.14	241.44	0	4.45	4.7	140	1.13	73	144	58	9.1	5.7	80.4	44.1			#NUM!	#NUM!	56	126
57	0	0	37	0	0	0	0	0	16500	0.01	92.02	0.01	165.49	3.233				196	120	17	7.7	4.4	75.5	44.8			5388	9.9	16.7	1.71	175.83	0	2.2	4.02	70	0.8	70	82	28	8.4	5.9	70.9	43.8	110.2	301	0.486056	0.0263212	-126	-38
58	0	0	37	0	0	0	0	0	1925	0.01	0.01	193.82	123.43	3.97864				20	20	21	6.5	3.2	72.9	46.7			7270	0.01	0.01	158.38	109.04	0	2.35	4.38	93	1.19	89	86	47	6	2.9	74.5	46.8			-0.577104	-0.0538349	69	66
59	0	1	37	0	0	0	1	0	48.62	0.01	0.01	170.97	98.98	4.62839				23	23	27	8.7	5.2	80.2	48.9			1.67	0.27	0.01	330.64	109.21	0	2.7	5.51	119	1.11	32	26	52	11.9	6.4	78	49.4			1.4641	0.042715	9	3
60	0	0	37	0	0				729	0.01	0.01	222.2	169.82	4.96095				40	22	11	6.9	4.1	72.8	44.9			172	0.01	0.01	138.09	159.72	0	3.93	3.64	170	1.57	42	59	21	9	4.6	75.9	43.4			0.627199	-0.0266295	2	37
61	0	1	37	0	0	0	0	0	37.22	0.01	6.51	2.1	114.33	0				17	23	19	12.1	4.7	74.6	45.9	109.6	307	30.36	0.58	1.54	2.08	201.22	0	3	4.59	105	1.13	34	33	71	11.7	7.1	71.5	44.1	4.5	248.1	0.0884746	0.245511	17	10
62	0	0	38	0	0	0	0	0	3953	0.01	0.01	179.51	188.78	2.54777	4.62	165	1.56	25	38	26	6.1	3.4	72.1	43			2559	0.01	0.01	169.48	124.5	0	2.95	4.35	117	1.05	60	84	34	7.1	3.3	69.1	43.4	110.8	319.4	0.188857	-0.180787	35	46
63	0	0	38	0	0	0	0	0	814	0.01	0.01	353.11	183.26	4.09691	4.66	225	2.72	18	21	24	8.4	3.9	71.5	41.2			5.68	0.01	0.01	272.72	99.98	2.32222	3.2	4.65	108	1.18	52	64	47	10	6	73.8	42.3	103.9	371	2.15628	-0.263155	34	43
64	0	1	38	0	0				2005	0.51	0.01	243.03	121.28	4.22272	5.79	163	1.22	21	31	14	15	9.4	77.2	46.8	99.7	281	258	0.01	0.01	114.13	45.12	0	2.2	5.67	64	1.01	49	102	58	9.4	5.5	70.2	42.9			0.890495	-0.42942	28	71
65	0	1	38	0	0	0	0	0	409	0.01	0.01	65.52	119.68	0				63	139	98	13.9	8.6	86.1	35.7	111.1	337.9	1468	0.01	0.01	23.86	59.4	0	2.42	4.54	203	0.88	93	101	110	11.4	6.7	81.1	46.8	101.9	338.5	-0.555003	-0.304235	30	-38
66	0	1	38	0	1				2657	0.01	0.01	116.09	139.08	3.42651	4.83	192	2.1	35	45	32	6.8	4	74.2	43.7			1464	0.01	0.01	123.52	191.6	0	4.01	4.61	141	2.61	116	191	114	10.6	6	79.2	45.8	107.7	582.6	0.25885	0.139131	81	146
67	0	1	38	0	0	0	1	0						2.69984													56.77	0.01	0.01	308.6	316.04	0	2.75	4.75	76	1.31	53	63	36	20.2	13.2	77.8	47.2	114.6	444.5	#NUM!	#NUM!	#VALUE!	#VALUE!
68	0	0	39	0	0				772	1.02	0.01	19.92	32.33	0				28	35	25	8.8	5.4	79.1	45.9			1824	0.01	0.01	13.83	231.36	0	3.1	4.26	160	1.3	70	36	75	6.7	3.8	74.8	42.3	109.4	510.9	-0.373408	0.854683	42	1
69	0	1	39	0	1									3.08279	4.7	181	2.25	38	79	111	10.4	4.7	81	41.2	118	317	7474	0.01	0.64	3.11	163.43	0	3.12	4.44	120	1.39	41	35	43	15.9		75.2	44.3			#NUM!	#NUM!	3	-44
70	0	1	39	0	0	0	0	0	2236	0.01	0.01	257.26	141.59	2.44091				17	15	21	18	11.1	87.3	52			394	0.29	0.01	205.5	179.03	0	3.84	4.39	93	1.02	118	211	63	10.1	5.3	74.4	44.5	111.7	349.9	0.753976	0.101893	101	196
71	0	0	39	0	0	0	0	0	19.71	0.01	0.01	262.45	193.21	4.33041				18	13	13	9.2	5.3	79.3	47.8	96	197.3	1.48	0.01	0.01	147.73	33729	0	2.49	4.28	109	1.1	97	93	69	7.5	3.9	69.7	42.5			1.12442	2.24197	79	80
72	0	1	39	0	0	0	1	0	1078	0.01	0.01	37.07	115.45	5.3962				17	19	18	27	19.1	76.4	48.5	116.5	330	20.16	8.94	0.01	42.62	104.3	2.09342	2.6	4.17	82	1.09	58	76	44	27.4	17	73	45.2	127.7	317.3	1.72813	-0.0441096	41	57
73	0	1	39	0	0				16500	0.01	77.83	0.66	139.87	2.8704				77	140	34	10.7	6	81	46.7	107.5	258.9	6362	0.01	16.27	4.79	45.67	2.68753					33	35	29	6.6	3.7	76.4	43.5			0.41389	-0.486094	-44	-105
74	0	1	39	0	0	0	1	0	882	1.49	0.01	664.83	194.16	1.83759	5.07	153	1.66	22	26	21	21.8	15.3	80.2	46.7	80.3	472.9	170	0.6	0.01	114.83	144.54	0	4.78	5.05	129	1.98	32	58	45	13.9	8.9	78	46.4			0.71502	-0.128172	10	32
75	0	1	39	0	0	0	1	0	466	0.01	1.2	2.18	74.43	0	5.82	108	1.17	32	47	52	13.6	9.7	75.4	48.2			1.59	6.87	0.65	3.92	250.53	0	2.82	5.41	118	0.99	57	70	186	14.3	8.5	74.7	49.3			2.46699	0.527112	25	23
76	0	1	39	0	1				1214	0.01	0.01	341.8	22.35	3.11059				16	18	15	7.7	4.3	78.1	46.6			675	0.01	0.01	127.11	3.57	0	2.32	5.32	84	0.96	40	53	25	9.5	6.3	78.7	47.2			0.254915	-0.796609	24	35
77	0	1	40	1	0	0	0	0	313	0.01	0.01	57.63	142.26	0				22	19	29	19.7	13.8	76.4	47.8	86.5	480.4	179	0.01	0.01	17.92	199.85	0	7.71	4.41	72	1.01										0.242691	0.147621	#VALUE!	#VALUE!
78	0	1	40	1	1	0	0	0	2959	45.42	0.01	265.25	171.02	3.03342	5.3	148	1.87	25	26	36	19.8	13.2	75.2	48.1	112.2	271	6673	17.81	0.01	312.39	183.94	0	2.08	4.78	100	0.97	52	56	87	10.6	7.4	68.2	42.6	114.2	292.1	-0.353176	0.0316293	27	30
79	0	1	40	1	0	0	0	0	22.91	0.01	0.01	161.75	125.65	0	4.11	210	1.74	20	16	16	5.8	2.7	77.3	48.4	110.3	423.9						0														#NUM!	#NUM!	#VALUE!	#VALUE!
80	0	0	41	1	1	0	0	0	2371	0.01	0.01	2.65	298.34	0				23	16	11	13.5	8.7	77.1	48.4								0														#NUM!	#NUM!	#VALUE!	#VALUE!
81	0	1	41	1	1	0	0	0	573	0.01	0.01	270.99	210.3	0				16	12	13	11.9	6.7	72	43.2	97.6	253.5	240	0.01	0.01	111.74	134.68	0	2.51	5.19	91	0.88	57	65	61	12.9	7.3	71.6	43.2			0.377943	-0.193536	41	53
82	0	0	41	1	1	0	0	0	1733	0.01	0.35	1.94	42.89	0	4.75	283	1.92										976	0.01	0.39	1.97	162.9	0	2.93	139	137	0.89	83	99	83	7.1	4	81.4	46.6			0.249349	0.579565	#VALUE!	#VALUE!
83	0	1	41	1	1	0	0	0	686	0.01	0.01	155.07	99.17	0	5.05	222	4.01	35	27	17	15.3	11	80.2	48.6			24.26	5.35	0.01	235.33	196.98	0	4.2	4.7	103	1.87	74	47	70	6.7	3.9	74.1	45.2			1.45143	0.298042	39	20
84	0	0	41	1	1	0	0	0	1303	0.01	0.01	172.63	138.99	4.32428				19	14	14	5.5	3.2	80.3	47.7			1349	3.42	0.01	134.1	94.12	0	2.7	33.56	102	1.41	118	82	64	4.7	1.7	71.4	41.7			-0.0150675	-0.169302	99	68
85	0	0	42	1	0	0	0	0	849	0.01	0.01	67.13	105.77	0													593	1.11	0.01	21.32	243.43	2.11394	2.77	3.23	172	0.78	40	29	32	4.3	2.4	77.3	44.6			0.155853	0.362012	#VALUE!	#VALUE!
86	0	1	42	1	0	0	0	0	138.94	0.01	0.01	186.28	216.96	6.30492	3.61	106	1.02	26	27	98	7	3.8	78.5	44.2	113.3	195	92.71	0.01	0.01	71.93	70.85	0	1.78	3.52	97	36	26	27	98	7	3.8	78.5	44.2	113.3	195	0.175701	-0.48604	0	0
87	0	1	42	1	1	0	0	0	3656	0.01	0.01	216.09	306.99	0	4.92	198	2.65										2427	0.01	0.01	122.16	89.12	0	2.76	4.77	100	1.46	39	52	19	11	5.6	77	46.4			0.177936	-0.537149	#VALUE!	#VALUE!
88	0	0	42	1	1	0	1	1	323.92	3.26	0.01	126.94	170.82	0	3.58	219	1.3	11	8	15	8.6	4.9	75.3	47.7	119.1	219	5.94	4.93	0.01	116.08	120.12	0	2.61	4.31	109	0.95	37	65	59	3.7		78.1	44.5			1.73665	-0.152923	26	57
89	0	1	42	1	1	0	1	0	529	0.01	0.01	1.7	8.12	3.4216	4.86	224	2.94	24	30	52	9.7	6.5	82.5	46.4	93.6	436						0														#NUM!	#NUM!	#VALUE!	#VALUE!
90	0	1	43	1	0	0	1	0	714	1.8	0.01	205.27	214.66	0				38	58	44	20.1	13.3	83.7	51.7	87.4	401.8	838	2.66	0.01	163.15	173.77	0	4.48	5.09	109	1.59	58	82	35	14.1	8.8	79.7	47	94.9	324	-0.0695458	-0.0917763	20	24
91	0	1	43	1	1	0	1	0	430	0.01	0.01	118.4	34.43	2.84323				23	32	18	7.1	4.2	72.2	47.1			154	0.01	0.01	136.58	13.42	0	2.38	4.84	105	1.07	29	46	75	9.5	5.1	73.1	44.9			0.445948	-0.409185	6	14
92	0	1	43	1	1	0	0	0	1012	0.01	0.01	140.21	124.63	0	4.74	175	1.72	20	21	28	9.2	5.8	69.8	45.2	99	364	843	0.01	0.01	304.67	229.45	2.54158	1.66	4.18	63	0.68	55	60	62	8.8		64.7	42.5			0.0793529	0.265065	35	39
93	0	1	44	1	1	0	1	0	4.44	1.32	0.01	76.14	103.7	0				41	47	28	22.6	14.4	80.4	50.2	94.2	336.4	8.34	6.22	0.01	34.5	72.03	0					37	37	28	18.7	11.7	77.6	48.8	92.9	335.9	-0.273783	-0.158265	-4	-10
94	0	1	44	1	1	0	0	0	10.12	0.01	0.01	281.42	314.98	4.32015													0.21	9.13	0.01	164.14	173.95	0	1.52	3.93	87	0.39	81	78	42	10.7	5.9	69.8	44.6			1.68296	-0.257859	#VALUE!	#VALUE!
95	0	0	44	1	0				46.06	0.01	0.01	135.7	72.03	0	4.5	145	1.45	19	12	12	9.1	5	79.6	49.2	93.3	213.6	21.92	0.01	0.01	311.43	277.9	0	3.16	4.09	59	0.85	73	70	34	8.4	4.1	76.7	42.8	103.4	211.1	0.322483	0.586375	54	58
96	0	1	44	1	1	1	1	1	156	0.01	0.01	2.48	35.67	3.54654	4.71	165	2.18	20	12	17	37.2	26.2	72.8	52	117.1	320	70.54	0.01	0.01	3.97	21.01	0	4.47	4.58	88	1.43	35	28	51	18.8	12.2	71.2	46.6	113.2	402	0.344689	-0.229877	15	16
97	0	1	44	1	0				500	0.5				3.26951	6.38	137	1.29	52	60	21	4.4	2.4	73.2	39.8	104.9	317.1	1.37	6.48	0.01	397.61	225.58	0	3.47	5.39	86	0.84	90	95	46	9.3	4.8	73.6	40.2	110.4	310.2	2.56225	#NUM!	38	35
98	0	1	44	1	0	0	1	1	16.37	0.01	0.01	18.89	69.11	1.86094				23	35	23	19.8	13.3	74	49.4	108.5	344.7						0														#NUM!	#NUM!	#VALUE!	#VALUE!
99	0	1	44	1	0	0	1	0	243	0.01	0.01	191.96	74.38	0				23	26	23	9.1	6.1	75.6	45.3	88	381.6	93	0.01	0.01	62.31	107.31	0	3.21	4.5	106	1.6	38	41	50	12.4	6.6	75.9	41.4			0.417123	0.159184	15	15
100	0	1	44	1	1	1	1	1	829	1.71	0.01	2.01	38.96	2.76864													334	0.01	0.01	124.81	94.63	0	4.23	4.49	140	1.12	40	38	53	7	4	76.1	45.7			0.394808	0.38541	#VALUE!	#VALUE!
101	0	1	44	1	0	0	1	1	1481	5.34	0.01	151.41	144.5	0				17	20	22	14.6	9.7	77.9	47.3	84.6	447	1170	1.37	0.01	157.74	150.18	0	4.3	4.31	164	1.27	42	29	59	10.8	6.7	70.1	43.6			0.102369	0.0167443	25	9
102	0	1	44	1	1	0	1	0	13	2.29				3.93399													5.39	0.23	0.01	148.67	96.87	0	4.34	4.8	4.8	1.77	21	19	19	19.4	12	75.8	46.6	108	262.9	0.382355	#NUM!	#VALUE!	#VALUE!
103	0	1	45	1	0	0	1	1	140	0.9	0.01	60.34	56.36	0				41	70	32	9	5.1	77.4	47.8	1026	264	170	0.01	0.01	49.49	69.07	0	6.69	5.27	174	2.31	23	19	37	10.5	6.5	79.5	48	94.9	259.1	-0.0843209	0.0883185	-18	-51
104	0	1	45	1	1	1	0	1	299	0.01	0.01	26.32	73.42	0	5.95	225	3.02	30	44	37	14.7	9.7	80.2	49.7	110.3	462.8	313	0.01	0.01	72.5	126.49	0	6.46	5.64	190	1.91	31	41	27	8.9	5.4	75.1	43.4	111.6	346.7	-0.0198731	0.236242	1	-3
105	0	1	45	1	0	0	0	0	3288	0.01	0.01	112.04	83.42	2.716													242	0.01	0.01	258.77	260.57	0	3.69	3.77	195	0.75	46	37	62	7.5	3.8	79	40.6	102.4	294.7	1.13312	0.494654	#VALUE!	#VALUE!
106	0	1	45	1	0	0	0	1	1.2	0.01	0.01	102.46	73.89	2.5092	4.88	231	1.31	17	20	14	14.6	9.8	85.3	45.7	103.1	526	1.28	0.01	0.01	73.89	228.6	0	2.81	3.66	78	0.71	29	29	23	14	8.4	79.2	43.1	100.6	586	-0.0280287	0.490491	12	9
107	0	0	45	1	0	0	0	0	1150	0.01	0.01	309.13	159.75	0				20	14	26	7	4.1	77.2	45.7	111.2	219	758	0.01	0.01	121.17	146.26	0	1.71	3.6	98	0.81	51	15	92	7	4.3	63.5	41.2			0.181029	-0.0383153	31	1
108	0	1	45	1	1	0	0	0	261	0.01	0.01	222.63	133.06	0				29	17	26	8.9	5	69	46.5								0														#NUM!	#NUM!	#VALUE!	#VALUE!
109	0	1	45	1	1	1		1	3655	0.01	0.01	264.51	186.44	0	6.11	228	1.47	19	19	19	15.1	9.6	75.8	49.3	94.2	480.5	26.19	0.01	0.01	164.14	184.83	0	3.17	5.92	110	1.06	33	61	134	13.5	7.7	73.2	48.8			2.14475	-0.00376663	14	42
110	0	1	46	1	1	0	1	0	3638	0.01	0.01	118.39	84.92	0	5.21	114	1.08	44	54	31	13	7.2	80.8	46.6			399	0.01	0.01	84.54	53.9	0	1.93	4.4	87	0.77	39	45	46	13.9	7	70.3	43.4			0.95989	-0.197421	-5	-9
111	0	1	46	1	1	0	1	0	1503	0.01	0.01	107.04	69.72	0				18	34	23	12.3	7.9	71.7	48.3	104.6	409	1535	0.01	0.01	40.85	68.99	0	3.12	4.23	4.23	1.41	34	36	49	11.5	6.7	64.6	41.5	107	363.7	-0.0091494	-0.00457123	16	2
112	0	0	46	1	0	0	0	0	1838	0.01	0.01	37.29	181.92	0	4.13	304	2.25	20	19	15	4.2	1.7	72.9	43.9	113.3	198						0														#NUM!	#NUM!	#VALUE!	#VALUE!
113	0	1	46	1	0	0		0	8.41	2.36	0.01	205.02	39.11	0													69.67	0.62	0.01	612.38	120.91	0	3.95	4.36	139	1.58	109	151	279	23.1	91	75.1	46.3			-0.91825	0.490174	#VALUE!	#VALUE!
114	0	1	47	1	0	0	0	0	543	1.14	0.01	166.28	313.9	0	6.31	231	1.08	23	20	16	17	9.2	72.6	47.8	103.8	273	643	0.64	0.01	96.06	188.34	0	3.6	5.78	178	0.77	141	222	36	12.4	7	69.8	42.5	107.5	292.9	-0.0734111	-0.221849	118	202
115	0	1	47	1	1	0	0	1						2.76864				21	31	47	12.3	8.3	73.5	47.5	97.7	396.6	33.71	0.01	0.01	42.35	169.98	0	5.33	4.81	129	1.04	21	20	55	11.4	7.9	67.1	45.6			#NUM!	#NUM!	0	-11
116	0	1	47	1	0				526	0.01	0.01	6.98	304.82	4.15229	5.19	224	2.08	22	45	36	16.1	10.3	77.4	49	106.8	387.8	457	0.01	0.01	2.8	61.83	0	2.9	4.26	166	1.39	49	83	59	15	8.9	70	44.5	112.3	312.9	0.0610695	-0.692844	27	38
117	0	1	47	1	0	0	1	0	250	0				0	5.14	196	1.43	27	47	21	9.6	6.2	86.9	48.6	99.2	341	67.77	0.01	0.01	50.3	82.85	0	1.52	4.67	89	0.58	47	54	32	9.6	5.1	71.6	42.5			0.566903	#NUM!	20	7
118	0	1	47	1	1	0	0	0	3826	0.01	0.04	2.14	92.02	0				23	22	19	13.9	8.7	79.1	49.1			2753	0.01	0.06	3.83	219.59	2.10721	3.1	4.95	163	0.88	51	54	26	10.2	5.4	76.9	45.7			0.142939	0.37773	28	32
119	0	1	48	1	1	0	0	0	67.18	0.01	0.01	1.6	24.54	0				23	20	20	38.1	28.2	77.8	50.9	105.5	240.2	10.39	0.01	0.01	2.13	29.2	0	2.22	4.6	103	0.92	59	68	71	21.4	13.1	70.3	47.4			0.810624	0.0755083	36	48
120	0	0	48	1	0	0	0	0	938	0.01	0.01	280.07	66.92	0	3.72	183	2.61	45	46	45	9	5.9	79.8	44.2			2553	0.01	0.01	159.99	186.87	0	3.56	3.65	75	1.37	35	35	33	9.2	5.2	80.6	44.9			-0.434848	0.445984	-10	-11
121	0	0	48	1	1				329	0.01	0.01	155.07	83.42	0				23	19	14	16	10.3	82.3	47.7	78.2	316.8	548	0.01	0.01	324.04	205.87	0	2.74	3.55	52	0.88	170	103	68	18.6	10	77.4	43.8			-0.221585	0.392323	147	84
122	0	1	48	1	1	0	0	0	782	0.01	0.01	281.74	206.73	0	5.91	149	1.82	25	29	13	30.3	20.8	78.3	50.8	102.7	303.7	288	0.01	0.01	100.92	110.6	0	2.89	4.63	75	0.47	37	33	40	18.8	12.1	73.5	45.6	103.7	270.7	0.433814	-0.271648	12	4
123	0	0	48	1	1	0	0	0	1039	0.01	0.01	167.18	114.13	0	4.43	101	0.7	15	11	13	21.1	13.4	76.5	48			388	0.01	0.01	173.34	85.79	0	2.74	4.14	77	0.39	33	31	25	11.9	6.1	75.2	45.5			0.427784	-0.123963	18	20
124	0	1	49	1	1	1	0	1	3121	0.01	0.01	2.33	111	2.989	4.77	137	0.96	28	21	30	17	9.7	77.1	47.9	103.5	410.9	1879	0.01	0.01	2.35	109.74	0	2.59	4.29	55	0.53	69	56	62	11.9	5.1	69.1	41.3	104.6	301.6	0.220367	-0.00495802	41	35
125	0	0	50	1	0	0	1	0	5.03	1.36	0.01	116.63	39.26	0				24	22	23	15	10.6	73	45.9								0														#NUM!	#NUM!	#VALUE!	#VALUE!
126	0	1	51	1	0	0	1	0						0													12593	0.01	0.01	44.5	139.95	0	2.7	4.59	127	1.02	38	54	64	16.8	10.9	70	40.8			#NUM!	#NUM!	#VALUE!	#VALUE!
127	0	1	51	1	0	0	0	0	188	2.64	0.01	310.58	243.02	0																		0														#NUM!	#NUM!	#VALUE!	#VALUE!
128	0	1	51	1	1	0	0	0	452	0.01	0.01	150.26	320.12	2.38021	5.3	191	1.25	24	34	44	16.3	11	77.5	46.6			81	0	0.01	167	310	0	2.39	4.94	116	0.76	29	31	73	11.9	6.9	74.3	44.9	102.5	337.6	0.746653	-0.0139511	5	-3
129	0	0	51	1	1	0	1	0	1869	0.01	0.01	179.47	107.35	3.55751													2746	0.01	0.01	157.35	95.24	0	3.37	4.28	122	1.5	66	82	96	12.1	6.1	75.2	47	110.2	266.4	-0.167091	-0.0519827	#VALUE!	#VALUE!
130	0	1	51	1	0	0	0	0	885	0.2	0.01	20.41	192.89	0				18	16	21	15.2	10.5	74.9	45.6			149	0.01	0.01	6.96	242.93	0	3.18	4.56	96	1.7	53	67	46	11.5	6.8	68	39.6			0.773757	0.100171	35	51
131	0	1	52	1	1	0	0	1	839	0.01	0.01	55.75	140.85	0	4.55	149	2.01										2043	0.01	0.01	36.3	100.41	0	2.88	4.51	116	1.02	57	62	45	10.6	5.8	69.5	44.9	96.4	350.2	-0.386506	-0.14698	#VALUE!	#VALUE!
132	0	1	52	1	1	0	0	0	1833	0.01	0.01	1.89	70.77	0				22	24	15	11	7.3	76.2	49.4	82.1	488	2324	0.01	0.01	1.73	12.08	0	2.31	4.02	132	0.7	33	34	43	9.6	5.2	60.3	39.4	81.5	325.9	-0.103074	-0.767782	11	10
133	0	1	52	1	1	0	1	0	15.01	0.01	0.01	105.01	86.43	0				15	12	23	12.4	7.7	74.9	46			16.96	0.01	0.01	132.6	252.82	0	3.39	4.63	104	1.93	33	29	47	9	5	74.4	44.6			-0.0530452	0.466147	18	17
134	0	0	53	1	0	0	0	0	506	0.01	0.01	9.84	132.71	5.08636	4.42	175	1.38	28	26	14	32.1	21.9	71.1	48.3	99.2	180.9	37.6	0.01	0.01	5.18	70.53	0	1.72	3.78	60	0.52	48	44	20	18.4	10.2	64.1	42.4	105	136.7	1.12896	-0.27453	20	18
135	0	1	53	1	0	0	0	0	848	0.01	0.01	190.37	317.3	0	4.31	154	1.54	25	20	13	22.2	11.5	68	41.2	98.5	465	1401	0.01	0.01	130.47	41.46	2.2014	2.33	4.1	75	1.05	34	30	24	15.6	7.3	65.5	37.7	109.1	419.1	-0.218042	-0.883841	9	10
136	0	1	53	1	0	0	1	1	8.74	0.01	0.01	171.67	116.47	3.75664				41	62	181	14	5.6	83.6	47.3			9.63	0.01	0.01	161.11	216.68	0	2.25	3.75	32	0.87	291	209	950	19.5	6.7	74.3	38.8			-0.0421149	0.269605	250	147
137	0	1	53	1	0	0	1	0	1035	1.82	0.01	9.5	198.57	0	5.27	165	1.35	21	17	18	13.1	8	80.3	49.4	102.4	296.4	1086	0.01	0.01	7.48	212.11	0	2.09	4.44	96	0.7	28	35	27	9.5	5.3	75	46.2			-0.0208895	0.0286475	7	18
138	0	1	53	1	0	0	1	0	0.92	0.01	0.01	42.51	87.67	0				17	21	23	15.5	10.6	78.9	47.8			1.68	0.01	0.01	12.41	152.76	0	3.06	4.44	136	1.77	22	18	34	13.7	8.1	68.7	42.3			-0.261521	0.241159	5	-3
139	0	1	53	1	0	0	1	0	66.66	0.01	0.01	253.02	161.29	0	4.8	204	3.07	108	167	96	13.4	8	79.6	46.1	58.5	446	43.62	0.01	0.01	132.05	112.09	0	3.32	4.42	96	1.32	248	341	199	9.3	4.2	72.9	42			0.18418	-0.158041	140	174
140	0	1	54	1	0	0	0	0	79.45	0.01	0.01	112.72	131.24	0	4.97	220	2.04	18	19	20	14	8.8	78	46.9	97.8	272	9.82	0.01	0.01	65.24	150.79	0	3.32	3.9	96	0.96	61	90	87	11.1	5.8	70.1	40.9			0.907982	0.0603063	43	71
141	0	1	55	1	0	0	1	0	6.68	3.42	0.01	7.88	125.65	0													4.37	0.01	0.01	5.43	221.88	0	2.99	4.17	78	0.91	86	106	70	27.2	16.8	76.8	43.9	76.3	321.2	0.184295	0.246956	#VALUE!	#VALUE!
142	0	1	56	1	1	1	1	1	502	0.01	0.01	263.96	111.23	4.13033	5.15	70	0.72	106	134	38	13.2	6.6	79.6	44.8	83.1	394	5.43	0.01	0.01	94.57	106.12	2.36922	2.55	4.53	59	0.74	205	229	243	18.2	7.4	78.9	42.4	94.9	456	1.9659	-0.0204247	99	95
143	0	1	57	1	0				935	0.01	0.01	236.3	159.21	0				37	53	17	10.4	6.1	74.3	46.3	95.2	416	207	0.01	0.01	242.42	180.67	0	2.47	4.88	57	0.69	32	29	27	14.4	7.5	71.6	44.3	81.4	469.3	0.654841	0.0549157	-5	-24
144	0	1	58	1	0	0	0	1	1558	0.01	0.01	105.25	107.36	0				24	14	16	8.6	4.8	77.1	45.9	73.8	338	49.07	0.01	0.01	40.63	186.92	0	2.35	4	71	0.68	41	33	26	7.9	3.8	72.3	40.7	72.4	327	1.50175	0.240813	17	19
145	0	0	58	1	0				634	0.01	0.01	160.08	209.67	0																		0														#NUM!	#NUM!	#VALUE!	#VALUE!
146	0	1	58	1	1	0	1	0	373	0.01	0.01	1.95	138.51	0				29	28	24	28.3	18.4	80.3	52.1	97.2		11.67	0.01	0.01	1.86	208.38	0					132	115	66	15.9	7.8	71.4	46.6			1.50464	0.177375	103	87
147	0	1	58	1	1	0	0	0	79.41	0.01	0.01	266	162.24	0				22	16	14	12	7.8	74.4	48.3	106.1	223.5	319	0.01	0.01	256.31	260.6	0	2.66	4.37	90	1.15	62	56	54	11.5	6.9	70	42.9	106.1	228.1	-0.603915	0.205816	40	40
148	0	1	58	1	0	0	1	0	79.38	1.84	0.01	50.78	186.44	0				18	20	17	9.6	6.1	76.1	50.6	97.2	510.8	205	0.01	0.01	12.01	99.87	0	2.66	4.53	119	1.02	27	28	28	8.9	5.5	75.9	49.3	98.3	536.3	-0.412043	-0.271104	9	8
149	0	1	59	1	1	0	1	1	1029	1.33	0.01	1.65	77.54	2.3962	5.43	148	1.05	18	13	26	11.4	6.7	75.4	45.9	77.1	368.8	1.01	0.01	0.01	2.45	218.74	0	2.86	4.46	76	0.68	90	116	92	11.1	5.3	69.5	40.9	88.5	307	3.00809	0.450402	72	103
150	0	0	60	1	0	0	1	0	2.51	2.65	0.01	2.79	125.49	5.0569				236	584	441	16	9.5	83	44	85.8	364.5	3.36	6.72	0.01	2.38	72.48	0	5.13	4.35	170	3.17	75	78	98	11.3	7.2	76	42.1	100.7	254.1	-0.126666	-0.238391	-161	-506
151	0	1	60	1	0	0	0	0	1562	0.01	0.01	180.62	179.12	2.97681				30	36	25	11.3	7.4	76.2	30.9	78.6	420	4.02	0.01	0.01	196.78	103.33	0	2.73	4.8	149	1.11	49	95	26	17.3	9.8	72.7	42.4	79.7	312	2.58945	-0.238918	19	59
152	0	1	27	0	0	0	0	0	46.33	0.01	0.01	91.63	75.67	0				20	15	30	7.2	4.8	76.7	49.6			12.81	0.01	0.01	196.79	191.57	0	1.81	4.5	143	0.86	34	38	55	9.6	5.4	71.5	43.8			0.558313	0.403404	14	23
153	0	1	40	1	0	0	0	0	1076	0.01	0.01	232.43	59.63	0	4.66	206	1.55	22	32	66	28.9	18.4	83.4	48.8	91.1	459	1288	0.01	0.01	153.94	58.49	0	2.95	4.82	148	0.93	33	52	99	14.3	9.2	78.1	45.2	92.3	478	-0.0781036	-0.00838319	11	20
154	0	1	52	1	1	0	0	0	1393	2.52	0.01	35.18	58.09	5.53275				22	14	14	11	6.6	75.5	47.6	104.3	199	494	0.01	0.01	18.01	96.44	0	3.62	4.71	109	0.71	81	81	39	8.6	3.5	70.7	41.3	113.1	197	0.450224	0.220156	59	67
155	1	1	47	1	1	0	0	0	278	0.01	0.01	142.1	109.25	0				55	106	28	10.9	7	79.8	46.3			0.09					0	3.37		165		30	14								3.4898	#NUM!	-25	-92
156	0	0	52	1	0	0	0	0	7.7	0.62	0.01	213.39	120.18	0				15	11	14	9.3	5.8	71.9	43.9			2.52	3.58	0.01	261.45	113.42	0	5.59	4.55	134	1.92										0.48509	-0.0251426	#VALUE!	#VALUE!
157	0	1	29	0	1	0	1	0	18.4	0.98	0.57	0.03	8.04	0																		0														#NUM!	#NUM!	#VALUE!	#VALUE!
158	1	1	42	1	1	0	1	0	68.75	0.73	0.01	7.33	215.08	0	4.88	235	1.65	15	9	15	14.2	9.2	71.2	45.3			1.21	0.59	0.01	13.85	97.1	0	2.55	4.21	146	1.26	31	33	30	9.7	5.5	70.1	43.7			1.75449	-0.345381	16	24
159	1	1	47	1	1	0	0	0	1.92	0.01	0.01	56.22	223.9	2.94349																		0														#NUM!	#NUM!	#VALUE!	#VALUE!
160	1	1	38	0	1	0	1	0	16.82	0.01	0.01	35.27	47.87	2.08636																		0														#NUM!	#NUM!	#VALUE!	#VALUE!
161	0	1	38	0	0	0	1	0	8.46	0.01	0.01	203.68	299.14	0				21	22	25	20.4	14.3	85.4	50.5			1.27	0.43	0.01	131.2	203.44	0	3.83	4.69	127	0.97	43	50	52	13.2	8.6	72	44			0.823567	-0.167438	22	28
162	1	1	48	1	1	0	1	0	515	0.01	0.01	146.57	73.26	0				27	23	75	10.9	7.2	77	50			4.04	0.01	0.01	227.96	157.45	0	4.1	4.52	183	1.37	33	24	127	12.7	7.9	77.5	46.2			2.10543	0.332276	6	1
163	1	1	37	0	1	0	0	0	3766	0.01	0.01	173.82	112.36	2.26482	5.29	180	1.97	21	21	11	7.1	4	75.9	45.6	116.8	376						0														#NUM!	#NUM!	#VALUE!	#VALUE!
164	1	0	47	1	0	0	0	0	16.58	1.53	0.01	137.04	109.9	2.22272				26	17	14	10.5	6.4	83	47.5			0.51	4.41	0.01	161.12	208.04	0	2.11	4.3	98	0.61	86	92	51	7.1	4.1	73.4	43.9			1.51201	0.277149	60	75
165	1	1	25	0	1	0	1	0	54.52	0.01	0.01	24.02	181.42	3.9196				21	41	26	8.6	5	78.7	48.9								0														#NUM!	#NUM!	#VALUE!	#VALUE!
166	0	1	35	0	0	0	1	0	364	0.01	0.01	220.55	134.18	0				21	25	26	17.2	11.3	79.8	48	96.3	456.4	1.28	0.01	0.01	160.09	101.42	2.4216	3.67	4.83	84	0.61	296	208	219	18.5	9.4	70	43.2			2.45389	-0.121564	275	183
167	1	1	47	1	1	0	0	0	16500	0.01	0.01	119.55	112.71	0				16	16	18	11.3	6.8	74.9	48.6			1.24	0.01	0.01	44.98	91.26	0	2.49	4.82	87	1.02	49	68	124	14.1	6.9	69.7	42.7			4.12406	-0.091682	33	52
168	1	0	28	0	1	0	0	0	87.99	0.27	0.11	2.69	79.34	0				16	20	10	7.7	4.5	79.9	45.2			1.71	6.59	0.05	2.26	105.11	0	3.3	5.14	161	1.05	66	29	33	6	3.8	75.6	42.1			1.71144	0.122152	50	9
169	1	1	36	0	1	0	1	0	697	0.01	0.01	227.15	173.2	0				25	22	25	17.7	12	77.4	48.7			2.05	0.01	0.01	58.03	45.17	0	3.21	5.11	102	0.78	55	76	43	15.5	10.2	68.5	42.6			2.53148	-0.583698	30	54
170	1	1	38	0	1	0	0	0	4.13	0.01	0.01	122.63	158.69	0				24	40	26	12.9	8.3	81.1	48.5								0														#NUM!	#NUM!	#VALUE!	#VALUE!
171	1	1	47	1	1	0	0	0	35					0													0.05	0.01	0.01	32.08	342.79	0	3.53	4.26	104	1.54	82	30	104	11.3	6	78.4	47.5			2.8451	#NUM!	#VALUE!	#VALUE!
172	0	0	35	0	1	0	0	0	1947	1.76	0.31	2.24	119.5	2.63144				28	24	8	9	5.1	80.9	49.5	114.6	295.3	36.86	3.06	0.01	3.81	539.26	0	2.17	3.53	126	0.89	68	82	45	7.6	4.1	73.9	45.6			1.72281	0.65443	40	58
173	0	1	33	0		0	0	0	11.38	0.96	0.01	162.26	54.78	3.79239	5.83	231	2.45	18	15	33	13.1	9	72.3	46.8			1.01	0.97	0.01	190.63	191.75	0	3.6	5.35	125	1.73	24	44	67	14.8	8.9	67.9	42.6			1.05182	0.544113	6	29
174	0	1	32	0	0	0	1	0	141.53					0													868	0.01	0.14	2.59	464.48	0														-0.787671	#NUM!	#VALUE!	#VALUE!
175	1	1	30	0	1	0	0	0	92.71	0.01	0.27	2.38	218.05	0													0.59	1.92	0.14	1.86	53.88	0	3.27	4.83	88	1.22	73	102	82	7.7	4.1	77.4	46.9			2.19627	-0.607129	#VALUE!	#VALUE!
176	1	1	50	1	1	0	0	0	5.15	8.81	0.01	202.79	172.36	0				25	18	13	18.5	13.3	71	44.9			0.41	3.79	0.01	174.33	135.1	0	4.66	4.66	117	1.79	53	45	56	10.3	6.1	68.2	40.9			1.09902	-0.105781	28	27
177	1	1	36	0	1		1		342	0.01	0.01	241.43	253.23	0				25	28	51	15.7	9.7	78.2	49.7			166	0.01	0.01	87.32	73.44	0	4.16	5.48	99	1.85	35	27	170	13.3	7.1	74.8	45.4			0.313918	-0.537582	10	-1
178	1	1	31	0	1		1		68.39	7.14	0.11	4.3	210.53	0				18	34	44	8.7	5.3	78.1	46.9	127.3	339	0.42	2.89	0.1	2.05	220.37	0	2.9	4.68	4.68	1.44	69	72	89	13.3	7.7	72.9	48.9			2.21174	0.0198385	51	38
179	0	1	32	0	1				64.1					0				35	84								59.1	0.01	0.01	148.96	150.35	0														0.0352705	#NUM!	#VALUE!	#VALUE!
180	1	0	54	1	1	0	1	0	1.31	0.01	0.01	98.95	127.31	1.94201				18	13	16	17.8	12.5	77.9	47.1			0.53	0.01	0.01	54.79	79.57	0														0.392995	-0.204113	#VALUE!	#VALUE!
181	1	1	38	0	1	0	0	0	244	0.01	0.02	3.83	281.7	0				32	37	30	10.7	6.1	75.5	46.8								0														#NUM!	#NUM!	#VALUE!	#VALUE!
182	1	1	27	0	0	0	0	0	11.48	0.01	0.01	194.8	114.77	0				26	32	48	12.4	7.3	79.2	43.8			1.14	2.39	0.01	132.26	125.17	0	4.95	5.28	88	3.32	61	49	189	18.7	10.4	81.3	47.6			1.00304	0.0376719	35	17
183	1	0	31	0	0	0	0	0	11.76	0.01	0.01	223.91	124.42	0				23	23	9	14.1	10.3	74.3	47.2			0.34	0.01	0.01	127.69	64.61	0	2.96	4.34	110	1.38	48	27	119	8	4.7	70.6	44.3			1.53893	-0.28459	25	4
184	1	1	34	0	0	0	1	0	3.09	0.38	0.01	183.46	104.46	0				32	62	44	16.2	9.8	75.9	46.5	96.3		0.31	0.01	0.01	239.45	89.1	0	3.54	5.25	134	1.3	48	85	86	11.7	6.5	72.4	45.6			0.998597	-0.0690723	16	23
185	1	1	40	1	1	1	0	1	506.1	0.01	0.01	2.19	121.56	0				21	20	19	15.1	10.1	77.5	47.7			158	0.01	0.01	2.26	81.86	0	4.06	5.04	78	0.9	79	58	47	17.7	10.2	72.6	45.1			0.505579	-0.171719	58	38
186	0	0	32	0	1	0	0	0	69.73	0.01	0.01	53.69	84.62	0																		0														#NUM!	#NUM!	#VALUE!	#VALUE!
187	1	0	48	1	1	0	0	0	1360	1.98	0.01	475.28	102.67	2.55751													1.03	0.01	0.01	100.73	90.88	0	2.63	4.08	80	0.95	119	63	145	12.2	6	68.1	42.9			3.1207	-0.0529752	#VALUE!	#VALUE!
188	0	1	34	0	1				2775	0.01	0.01	120.37	123.85	0													393	0.01	0.01	153.78	100.49	2.40483	3.98	4.25	83	0.76	164	57	99	9.2	3.8	75.7	46.1	119.1	206.7	0.84887	-0.0907732	#VALUE!	#VALUE!
189	1	1	39	0	1	0	0	0	15.09	0.92	0.01	2.15	214.58	2.36736	5.48	142	2.12	26	34	17	12.8	7.9	76.5	49.4			1.15	26.3	0.01	2.26	120.78	0	3.32	4.83	55	1.16	45	52	34	8.9	4.7	75.8	45.7			1.11799	-0.249594	19	18
190	0	1	51	1	0	0	0	0	1.41	0.01	0.01	2.91	170.02	4.80072													0.56	1.35	0.01	3.33	219.86	0	3.6	4.02	101	1.23	33	21	36	12.8	7	82.1	44.9			0.401031	0.111646	#VALUE!	#VALUE!
191	0	0	20	0	0				735	0.01	0.01	6.92	91.57	0				27	35	18	4.2	2.4	75	47.8	133.3	299						0														#NUM!	#NUM!	#VALUE!	#VALUE!
192	1	0	32	0	1	0	0	0	57.76	0.01	0.01	3.72	234.35	0																		0														#NUM!	#NUM!	#VALUE!	#VALUE!
193	1	1	54	1	1	0	1	0	5.01	0.01	0.01	3.92	102.74	0													0.57	0.01	0.04	1.98	70.97	0														0.943963	-0.160665	#VALUE!	#VALUE!
194	0	1	30	0	1	0	0	0	2031	0.01	0.01	118.87	94.6	0				19	11	13	13.5	8.9	77.3	53			142.18	0.01	0.01	71.1	139.11	0	2.4	4.47	127	1	99	90	84	9.6	5.5	69.3	46.5			1.15487	0.167467	80	79
195	1	1	56	1	1	0	0	0	5.67	0.01	0.01	129.12	169.7	0																		0														#NUM!	#NUM!	#VALUE!	#VALUE!
196	0	1	25	0	1	0		0	16500	0.94	105.84	0.03	115.08	1.98677													7788	0.01	10.42	2.16	120.13	0														0.326058	0.0186516	#VALUE!	#VALUE!
197	1	0	32	0	0	0	0	0	237	0.15	0.01	158.15	297.51	0				16	12	18	9.1	5.3	78.3	46.4			0.03	94.35	0.01	138.46	91.36	0														3.89763	-0.512745	#VALUE!	#VALUE!
198	0	1	31	0	0	0	0	0	195.11	4.05	0.25	2.54	153.72	0	5.26	223	2.53	19	20	50	7.5	4.7	72.4	45.2	111.8	422.1						0														#NUM!	#NUM!	#VALUE!	#VALUE!
199	0	1	44	1	0	0	1	0	100	0.08				0				19	20	23	15.5	10.6	78.8	49.1			1.13	0.01	0.01	119.41	277.9	0	3.16	5.11	134	1.58	50	27	39	16.7	10.3	81.3	49.4			1.94692	#NUM!	31	7
200	0	1	50	1	1	0	1	0	16.55	0.01	0.01	110.28	134.79	0																		0														#NUM!	#NUM!	#VALUE!	#VALUE!
201	0	1	28	0	1	0	0	0	24.57	0.01	0.34	2.57	29	2.04922													2.59	1.17	0.26	2.42	34.13	0	3.8	4.68	116	1.1	41	75	49	9.5	6.7	77.1	49.1			0.977105	0.0707383	#VALUE!	#VALUE!
202	0	1	38	0	1	0	1	0	1198	0.01	0.01	196.79	147.24	0				19	26	25	15.8	10.8	72.2	45.4			1163	0.01	0.01	44.29	192.35	0	2.4	5.18	96	1.25	51	25	120	13.5	7.6	69.8	45.5			0.0128771	0.116066	32	-1
203	0	1	38	0	1	0	0	0	1445	0.01	0.01	7.52	123.62	4.7348				15	14	18	8.9	5.3	67.9	45.7			12.33	0.01	0.01	4.6	197.87	0	4.1	4.82	80	1.41	48	51	74	8.7	4.8	63.1	39			2.0689	0.204291	33	37
204	0	1	34	0	0	0	1	0	1125	0.01	0.01	230.62	124.72	0				24	36	25	8.3	5.3	75.9	49.5			6.5	3.03				0	2.04	5.17	72	0.98	51	39	45	13.6	8.1	72.4	47.3			2.23824	#NUM!	27	3
205	0	0	38	0	1	0	1	0	8104	0.01	80.99	0.01	274.14	0													2813	0.01	10.57	2.03	114.14	0	1.69	4.31	74	0.74	76	73	23	11.5	5.6	72.9	46.5			0.45953	-0.380535	#VALUE!	#VALUE!
206	1	1	43	1	1	0	1	0		0.01	0.01	2.15	265.07	0													1.4	1.39	0.01	3.46	99.19	0					44	21	77	10.8	5.6	75.3	45			#NUM!	-0.426893	#VALUE!	#VALUE!
207	1	0	42	1	1	0	0	0	967	0.01	0.01	13.32	178.3	0				25	21	20	8	4.8	73.6	47.6			0.14	9.8	0.01	3.97	256.23	0														3.8393	0.157479	#VALUE!	#VALUE!
208	0	1	52	1	1				1217	0.01	0.01	2.96	116.66	0				22	18	13	16	11	83.9	46.8			36.78	0.01	0.01	2.72	124.22	0	3.3	4.17	82	1.65	81	42	61	11.2	6.3	79.7	43.5			1.51968	0.0272696	59	24
209	0	0	26	0	1	0	0	0	945	1.56	0.01	2.48	90.64	2.57403													42.38	37.98	0.01	2.29	48.7	0														1.34827	-0.269791	#VALUE!	#VALUE!
210	1	1	44	1	0	0	0	0	25.069	0.01	0.01	180.96	112.58	0													0.01	0.64	0.01	233.46	160.03	0	2.69	4.29	90	0.97	164	82	222	8.9	3.9	67.4	41.2			3.39914	0.15274	#VALUE!	#VALUE!
211	0	0	40	1	1	0	0	0	1687	0.01	0.56	2.23	95.58	0													741	0.01	0.12	2.26	191.37	0	4.71	4.2	187	1.04	38	44	54	7.3	4.2	76.4	44.9			0.357297	0.301507	#VALUE!	#VALUE!
212	1	1	41	1	1	0	0	0	472	0.01	0.01	78.37	40.65	0				21	12	16	17	11	72.1	47.3	80.2	444.4	1.65	0.01	0.01	133.39	140.08	0	3.2	4.2	94	0.99	126	61	155	12.3	5.6	70.6	40.9	106	274.5	2.45646	0.537316	105	49
213	1	0	29	0	1	0	0	0	160	0.01	0.01	2.96	46.02	0				15	18	12	12.4	7.5	74.6	47.2	124.5	366	16.68	0.01	0.01	4.43	306.79	0	3.73	4.17	95	1.37	54	102	47	12.3	7.1	73.1	45.9	122.1	263	0.981924	0.823895	39	84
214	0	1	36	0	1	0	0	0	66.64	0.01	71.88	0.88	136.85	0	5.02	277	2.07	19	22	25	11.5	6.8	76.1	45.3			37.74	0.01	34.17	2.52	198.36	0	3.3	4.48	139	1.44	30	50	31	6.7	3.7	69.6	28.5			0.246933	0.161209	11	28
215	1	1	44	1	1	0	0	1	22.61	0.01	0.01	150.24	138.247	3.68753				20	20	13	13.5	8.7	72.7	46.8	104.4	365.1	0.49	7.44	0.01	219.21	212.77	0	2.96	4.7	152	1.08	31	38	22	11	6.3	66.1	45.6	114.7	261.7	1.6641	0.187255	11	18
216	1	1	31	0	0	0	0	0	1.64	0.01	0.01	13.01	271.29	0													0.01	1.46	0.01	5.69	121.49	0	3.28	4.46	113	1.04	40	36	35	19.4	11	75.4	44.1			2.21484	-0.348893	#VALUE!	#VALUE!
217	0	1	32	0	1	0	1	0	42.56	0.01	0.07	3.54	90.66	0													42.6	0.01	0.04	1.85	52.76	0														-0.00040798	-0.235111	#VALUE!	#VALUE!
218	1	0	52	1	1				89.35	0.01	0.01	262.1	206.71	2.96426				23	14	11	7.1	4.2	82.5	48.4			3.29	0.01	0.01	129.44	86.95	0	3.69	3.54	194	1.76	49	42	15	6.3	3.7	85.6	46			1.4339	-0.376092	26	28
219	1	0	33	0	0	0	0	0	328	8.23	0.01	266	146.93	0				18	16	12	10.9	6.2	79.8	49.6			0.32	7.17	0.01	115.75	106.17	0	2.58	4.52	103	0.78	91	84	91	6.5	3.1	77.1	44.7			3.01072	-0.141109	73	68
220	0	1	30	0	1	0	0	0	252	0.01	0.04	2.58	78.3	4.11727				23	20	15	14.3	9.1	75.9	49.9			6.06	0.01	0.01	1.44	45.19	0	3.68	4.45	165	1.2	25	28	43	8.5	4.5	69.9	48.2			1.61893	-0.238719	2	8
221	0	0	40	1	0	0	0	0	16.31	6.12	0.01	191.38	97.04	0				22	13	19	8.3	5.3	77.2	44.1								0														#NUM!	#NUM!	#VALUE!	#VALUE!
222	1	1	41	1	1	0	0	0	3.78	6.18	0.01	72.56	106.51	0													0.56	7.69	0.01	148.67	223.13	0	4.7	4.88	96	1.02	44	13	43	10.4	4.9	70.3	39			0.829304	0.321168	#VALUE!	#VALUE!
223	0	0	38	0	1	0	1	0	350	1.04	0.52	1.1	37.31	2.15229				16	16	13	15	9.3	73.9	45.9								0														#VALUE!	#NUM!	#VALUE!	#VALUE!
224	0	1	44	1	1	0	1	0	317.86	0.01	0.01	22.53	239.88	0				28	49	25	21.3	15.3	73.8	46.5			0.52	3.97	0.01	12.68	335.67	0	2.43	5.05	92	0.86	145	123	107	23	13.6	73.3	46.2			2.78623	0.145918	117	74
225	1	1	40	1	1	0	1	0	125	0.01	0.18	1.56	25.31	0																		0														#NUM!	#NUM!	#VALUE!	#VALUE!
226	0	0	30	0	1	0	0	0	1431	4.73	0.01	203.5	190.36	0													2.12	139.23	0.01	145.28	112.4	0														2.8293	-0.228809	#VALUE!	#VALUE!
227	1	0	40	1	1	0	0	0	66	0.01	0.02	2.17	43.73	0													0.22	2.41	0.01	2.27	35.73	0	3.37	4.97	111	1.19	76	30	30	5.3	2.7	79.5	46.4			2.47712	-0.0877465	#VALUE!	#VALUE!
228	1	1	29	0	1				35.71	0.01	0.03	2.55	140.35	0				23	28	17	12.8	8.1	74.1	47.4			0.01	25.13	0.01	3.02	214.06	0	4.24	5.17	61	1.92	49	57	78	7.3	4.5	67.8	24.9			3.55279	0.183323	26	29
229	0	0	36	0	1	0	0	0	1507	3.8	0.12	2.14	94.32	0				44	35	9	22.6	14	81.3	46.3			18.14	2.51	0.19	2.4	201.9	0	6.54	3.91	164	1.35	44	11	13	8.4	4.4	75.7	43.3			1.91948	0.330533	0	-24
230	1	1	54	1	1	0	0	0	6	0.01	0.01	43.31	156.47	0				23	23	21	16.3	10.5	74.6	46.3			0.8	0.01	0.01	13.74	184.36	0	2.81	4.67	68	0.7	92	104	93	16.5	9.5	77.6	47.4			0.875061	0.0712356	69	81
231	1	1	33	0	1	0	0	0	0.59	0.41	0.01	97.15	45.49	2.22789																		0														#NUM!	#NUM!	#VALUE!	#VALUE!
232	1	1	56	1	0	0	0	0	1.29	0.01	0.01	25.8	120.77	0	4.98	160	1.62	24	20	16	12.2	7.4	75.6	47.7			0.59	0.01	0.01	12.64	118.51	0	3.92	4.32	110	1.17	28	19	25	12.2	6.6	75.3	41.7			0.339738	-0.00820407	4	-1
233	1	0	45	1	1	0	0	0	639	0.01	0.01	144.99	88.64	0	4.52	161	2.54	17	15	23	6.7	3.9	75.8	46.6			1.15	0.25	0.01	153.49	207.81	0	4.44	4.18	76	1.13	55	56	55	7.9	5.3	68.6	43.5			2.7448	0.370037	38	41
234	1	1	58	1	1	0	0	0	37.93	0.01	0.01	95.05	69.32	0				24	16	17	14.2	8.4	77.9	49.3			0.54	0.01	0.01	154.5	314.8	0	2.47	3.96	85	1.01	81	61	38	9.4	4.8	72.1	43.9			1.84659	0.657176	57	45
235	0	1	57	1	1	0	1	0	1.28	5.13	0.01	156.22	228.75	0				71	47	43	13.9	9.8	77	45.5			1.14	0.93	0.01	56.92	61.28	0	4.23	5.17	138	1.09	113	119	90	12.2	7.3	74.8	45			0.0503051	-0.572042	42	72
236	0	1	34	0	1	0	1	0	35.47	1.66	0.6	2.31	1.82	0													0.56	0.01	0.27	1.49	1.55	0														1.80167	-0.0697397	#VALUE!	#VALUE!
237	1	0	39	0	1	0	1	0	38.73	0.01	0.31	5.95	191.15	0				21	30	26	4.4	2.1	73.3	43.2			0.31	0.92	0.23	2.85	136.21	0	4.13	4.4	165	0.81	85	98	127	8.1	4.3	81.5	44.4			2.09669	-0.147165	64	68
238	1	1	42	1	1	0	0	0	50.99	0.01	0.22	3.43	81.65	0				25	30	18	16.8	10.5	72.7	47.8			0.53	0.01	0.05	2.63	66.25	0	2.04	4.21	97	1.03	43	42	38	10.5	6.1	69.9	44.9			1.98321	-0.0907703	18	12
239	0	1	40	1	1	0	0	0	20.87	0.01	0.01	189.59	309.84	0				21	15	22	26.7	18.3	85.5	50.6			1.43	1.24	0.01	69.45	83.74	0														1.16419	-0.568205	#VALUE!	#VALUE!
240	1	1	38	0	1	0	1	0	208	0.01	0.01	264.67	54.05	0																		0														#NUM!	#NUM!	#VALUE!	#VALUE!
241	0	0	28	0	1	0	0	0	0.67	5.52	0.01	2.58	376.06	0																		0														#NUM!	#NUM!	#VALUE!	#VALUE!
242	1	0	30	0	1	0	0	0	1.2	0.76	0.18	2.25	336.41	0													0.11	9.64	0.01	2.39	75.05	0														1.03779	-0.651518	#VALUE!	#VALUE!
243	1	0	52	1	1	0	0	0	19.62	0.01	0.01	2.49	46.93	0				23	17	13	11.8	8.4	76.6	43.6			0.41	0.01	0.01	2.19	84.96	0					49	35	28	8.5	4.6	76.9	45.8			1.67992	0.257764	26	18
244	0	0	30	0	1				537	0.01	0.01	2.02	22.85	2.16732				14	13	9	4.7	2.6	75.5	43.7								0														#NUM!	#NUM!	#VALUE!	#VALUE!
245	1	1	36	0	0	0		1	6.84	0.01	0.01	68.49	132.81	2.65128				21	21	21	14.9	10.2	68.4	47.2			0.11	23.01	0.01	52.54	166.19	0	2.08	4.83	86	0.71	87	83	111	12.9	8.4	67.9	45.5			1.79366	0.0973741	66	62
246	1	0	40	1	0	0	0	0	510	0.01	0.01	175.88	106.26	0				15	9	8	7.6	4.7	71.9	45.3								0														#NUM!	#NUM!	#VALUE!	#VALUE!
247	1	0	35	0	1	0	1	0	49.99	2.95	0.22	2.46	211.63	0																		0														#NUM!	#NUM!	#VALUE!	#VALUE!
248	1	1	29	0	1	0	0	0	0.7	0.01	0.37	2.55	126.66	0				23	23	18	39.9	29.7	81.7	53.1			0.21	0.01	0.12	2.76	87.29	0	2.54	4.86	92	1.09	41	50	25	29.7	20.4	72	44.8			0.522879	-0.161675	18	27
249	0	1	38	0	1	0	0	0	90.2	0.01	0.01	2.01	139.67	0				22	18	17	4.2	2.4	73.9	46.4	110.6	233	36.53	0.01	0.01	2.09	173.15	0	3.61	4.63	92	1.04	201	76	72	10.6	4.3	69.1	41.2			0.392557	0.0933194	179	58
250	1	1	41	1	1	0	1	0	31.23	0.01	0.01	178.18	127.71	0																		0														#NUM!	#NUM!	#VALUE!	#VALUE!
251	1	1	48	1	1	0	0	0	270.35	36.2	0.01	33	212.41	0				18	30	15	20.4	12.7	76.9	50.9			0.51	21.22	0.01	15.04	221.27	0	2.89	4.8	62	1.17	116	195	79	17	7.9	73.9	47			2.72436	0.0177476	98	165
252	1	1	39	0	1	0	0	0	360	0.01	0.02	4.67	75.61	0				18	15	16	109	7.1	78.3	49.9			0.01	9.88	0.01	8.2	163.71	0	1.65	4.38	90	0.76	69	54	73	7.3	3.9	72.8	43.2			4.5563	0.335496	51	39
253	1	1	38	0	1	1	0	1	1680	0.01	0.01	89.28	55.32	0				43	38	81	12.7	7.8	82.1	48.4	109.8	434	1.07	6.27	0.01	120.93	62.27	0	2.31	5.08	81	1	277	175	511	12.7	5.3	70.2	41.6	119.7	295	3.19593	0.0513967	234	137
254	0	0	34	0	1	0	1	0	15882	0.01	71.17	0.01	167.6	0				36	67	68	15.6	10	77.6	48.6								0														#NUM!	#NUM!	#VALUE!	#VALUE!
255	0	1	43	1	1	0	0	0	32.78	2.02	0.01	137.57	171.26	2.53908	5.78	215	1.88	24	19	18	8.3	5.2	82.7	47.4			7.91	1.39	0.01	112.38	159.46	0	2.53	4.87	113	0.93	49	41	48	12.2	7.7	74	45.5			0.617432	-0.0310042	25	22
256	0	1	32	0	1	0	1	0	920	0.01	41.67	2.89	74.95	0													3.17	0.01	0.57	3.74	245.59	0	2.28	5.23	142	0.84	135	82	242	41.3	2.7	70.6	42.1			2.46273	0.515439	#VALUE!	#VALUE!
257	1	1	50	1	1	0	0	0	38.91	0.01	0.01	129.96	157.96	0				35	21	27	18.6	12.8	79.6	50.1	73.5	357	1.14	0.01	0.01	149.11	140.81	0	3.12	4.21	130	1.24	23	21	43	10.7	7	71.1	7			1.53316	-0.0499136	-12	0
258	0	0	39	0	1	0	0	0	4470	0.01	0.01	294.04	191.18	3.12057				18	12	14	9.2	4.1	79.4	46.6								0														#NUM!	#NUM!	#VALUE!	#VALUE!
259	1	0	34	0	0	0	0	0	427	0.01	0.01	30.34	172.78	0				20	8	7	11.3	6.7	79.7	51.8								0														#NUM!	#NUM!	#VALUE!	#VALUE!
260	1	1	26	0		0	0	0	3082	0.01	0.01	182.37	174.94	2.58771				16	14	12	15.7	9.7	75	47.5			28.21	0.01	0.01	247.19	689.12	0	5.06	4.73	145	1.45	120	158	77	9.2	4.4	79.2	48.6			2.03843	0.595406	104	144
261	1	1	26	0	0	0	0	0	6.55	7.15	0.01	209.39	113.39	1.89432				20	14	18	14.3	9.9	72.7	47.5								0														#NUM!	#NUM!	#VALUE!	#VALUE!
262	1	1	26	0	0	0	1	0	3.28	0.71	0.01	204.1	100.66	0				23	38	41	10.2	6.4	76.5	45.8			0.51	3.47	0.01	204.99	162.8	0	2.82	5.52	179	1.27	45	61	88	14	8.1	77.5	48.5			0.808304	0.208797	22	23
263	0	1	37	0	1	0	0	1	40.39	0.01	0.13	2.57	93.48	2.0086				37	26	24	7.7	4.7	70.5	46.5			4.99	0.01	0.11	1.63	35.18	0	2.99	4.66	111	0.97	39	53	65	15.6	8.8	72.9	49.1			0.908173	-0.424423	2	27
264	0	1	36	0	1	0	0	0	106.3	1.12	0.03	2.49	104.73	0	4.76	90	1.1	38	52	27	14.9	9.2	77.6	51.7								0														#NUM!	#NUM!	#VALUE!	#VALUE!
265	0	1	54	1	1	0	0	0	101	0.01	0.01	174.8	141.37	0				21	13	22	8.8	5.4	87.9	51.7			43.85	0.01	0.01	122.09	101	0	3.89	3.84	125	2.2	43	18	39	8	3.5	80.8	46.6			0.362352	-0.146036	22	5
266	0	0	34	0	1	0	0	0	830	0.1	0.01	148.28	248.26	0				22	19	26	11.6	7.2	87.8	50.1			0.56	2.67	0.01	124.32	277.43	0	2.43	3.92	93	0.99	237	55	278	14.1	5.5	79.5	44.6			3.17089	0.0482467	215	36
267	1	1	32	0	1	0	0	0	69.72	4.74	0.01	65.74	50.14	2.35793	4.81	214	1.11	24	20	24	4.1		82.8	46.2			6.57	7.4	0.01	135.97	102.44	0	3.8	4.89	94	1.1	101	95	179	7.6	3.5	79.9	44.5			1.02579	0.310285	77	75
268	0	1	42	1	0	0	1	0	31.86	0.01	0.01	40.69	94.43	0	4.87	146	1.57	16	16	21	14.4	9.3	79.2	48			3.1	0.01	0.01	29.07	109.7	1.8488	1.62	3.92	79	0.67	41	54	64	9.8	4.9	73.1	40.8			1.01188	0.0650966	25	38
269	0	1	55	1	1	0	1	0	315	0.01	0.01	1.77	38.01	0				21	21	24	5.6	2.8	71.4	43			23.65	2.19	0.01	1.71	9.95	0	3.13	4.67	130	1.23	45	44	112	8.3	4.2	67.2	41.5			1.12448	-0.582075	24	23
270	0	0	30	0	1	0	0	0	275	0.01	0.01	210.69	358.36	0				16	10	16	12.8	8.4	82.3	52.4								0														#NUM!	#NUM!	#VALUE!	#VALUE!
271	0	1	28	0	1	0	0	0	275	0.01	0.01	210.69	358.36	0				16	10	16	12.8	8.4	82.3	52.4								0														#NUM!	#NUM!	#VALUE!	#VALUE!
272	1	1	38	0	0	0	1	0	2.23	0.01	0.01	6.17	302.83	1.92065				24	32	24	14	9.6	75.6	47			1.87	0.01	0.01	2.49	115.3	0	2.89	5.19	161	0.99	60	59	53	5.7	3.1	73	44			0.0764633	-0.41937	36	27
273	0	1	30	0	0	0	1	0	64.58	0.01	0.01	113.96	53.71	0				31	89	48	13.6	9.2	84.2	51.8			0.31	4.7	0.01	254.94	167.76	0	2.89	5.39	103	1.29	209	349	439	9.9	4	76.4	47.7			2.31874	0.494633	178	260
274	1	0	43	1	1	0	0	0	4.66	0.01	0.01	277.88	214.67	0				15	10	10	10.3	6.4	81.8	47.8			0.52	3.02	0.01	134.52	150.06	0	2.55	3.73	142	0.86	61	59	39	6.6	3.8	80.2	42.9			0.952383	-0.155506	46	49
275	1	1	48	1	1				40.31	0.01	0.01	10.96	179.39	3.04922													3.63	0.01	0.01	5.19	239.63	0	2.88	3.92	74	1.21	30	36	27	7.8	4.5	72.6	44.8			1.04551	0.125743	#VALUE!	#VALUE!
276	1	1	33	0	0				130	0.01	0.01	174.12	224.9	0				25	12	25	19.9	13.8	74	46.3			0.22	0.51	0.01	83.78	68.04	0	7.17	4.51	183	0.98	28	18	55	16	9.7	76.9	45.7			2.77152	-0.519225	3	6
277	1	1	36	0	1	0	1	1	696	0.01	0.01	2.89	146.35	0				24	25	30	21.4	14.5	81.7	46.9			5.53	0.01	0.01	2.66	104.82	0	3.2	5.68	78	1.02	42	49	52	19.8	11.3	78.6	45.9			2.09988	-0.144949	18	24
278	1	0	45	1	1	0	0	0	400	1.43	0.01	232.79	124.61	0				19	12	10	5.7	2.6	76	49.1			1.08	9.73	0.01	241.69	146.13	0	1.94	3.51	80	0.65	79	20	44	5.9	2.3	66.8	42.6			2.56864	0.0691865	60	8
279	0	1	50	1	1	0	0	0	832	0.01	0.01	2.86	186.75	0																		0														#NUM!	#NUM!	#VALUE!	#VALUE!
280	0	0	29	0	1	0	0	0	435	0.01	0.01	11.7	63.32	0				24	33	14	18.1	12.2	76.9	48.2			532	0.01	0.01	161.05	220.92	0	2.53	4.19	116	0.75	25	25	12	7.5	4.2	74.5	41.7			-0.0874224	0.542694	1	-8
281	0	1	39	0	1	0	0	0	1050	2.61	0.01	57.48	51.61	0				18	21	14	12	8.2	78.7	50.3								0														#NUM!	#NUM!	#VALUE!	#VALUE!
282	0	1	46	1	1	0	1	0	40.7	0.01	0.01	278.85	247.54	0																		0														#NUM!	#NUM!	#VALUE!	#VALUE!
283	1	0	44	1	1	0	0	0	0.6	259.94	0.01	19.7	372.65	0				27	18	15	5.5	3.3	79.8	45.4			0.05	50.35	0.01	10.81	184.29	0	3.01	4.32	104	1.54	50	39	42	6	3.7	76.7	44.1			1.07918	-0.305799	23	21
284	1	0	42	1	1	0	1	0	94	0.01	3.43	2.49	210.29	0				16	11	11	16.6	11.3	74.5	42.1			3.1	0.01	0.32	1.22	73.15	0	2.49	3.44	170	0.87	52	43	23	15.7	9.9	74.6	43.6			1.48177	-0.458604	36	32
285	0	1	33	0	1	0	0	0	7865	0.01	10.5	1.79	126.55	0				18	17	29	13.3	8.8	83.3	48.8	99	420	3106	0.01	8.6	1.73	136.71	0	2.97	5.18	97	1.25	93	149	93	12.8	7.7	82.5	47.1			0.403497	0.0335381	75	132
286	0	1	32	0	1	0	1	0	1.69	0.01	0.01	7.06	95.22	0				22	24	29	8.6	5.3	76.5	46.7	113.7	403.6	1.42	0.01	0.01	10.83	135.64	0	5.82	5.41	90..0	0.97	64	75	113	11.4	6.2	74.8	46.9			0.0755984	0.15366	42	51
287	0	1	55	1	1	0	1	0	1.4	0.01	0.01	90.34	404.72	0	4.88	186	1.59	44	78	38	15.8	10.1	75.8	49.3			0.05	1.79	0.01	46.09	138.13	0	4.38	5.03	167	1.42	30	37	88	11.2	6.7	79.5	50.9			1.44716	-0.466867	-14	-41
288	0	1	42	1	1	0	0	0	5.57	0.01	1.39	2.18	56.79	0													1.41	0.01	0.9	1.53	3.98	0	3.1	4.76	75	0.92	145	179	81	10.6	5.2	72.3	45.7			0.596636	-1.15439	#VALUE!	#VALUE!
289	1	1	37	0	1	0	1	0	313	0.01	0.01	237.46	117.74	0	5.4	184	1.18	27	22	31	10.6	7.3	79	48.7			5.7	0.11	0.01	222.65	230.29	0	2.72	4.8	91	0.77	29	28	29	12.5	7.6	77.5	47.4			1.73967	0.291351	2	6
290	1	1	34	0	1	0	0	0	30.85	0.01	0.01	2.96	205.65	2.26717				23	11	21	7.3	4.5	73	47.4			0.53	0.38	0.01	2.24	124.65	0	2.31	4.57	115	0.85	75	42	79	9.2	5.9	72.8	44.8			1.76498	-0.217436	52	31
291	1	1	43	1	1	0	0	0	2.97	0.01	0.01	235.23	216.08	0				23	18	32	11.1	7.7	82.1	4.5								0														#NUM!	#NUM!	#VALUE!	#VALUE!
292	1	1	45	1	1	0	0	0	502.7	0.01	0.01	28.85	117.46	2.60097													4.93	0.01	0.01	33.65	23.11	0	3.2	4.32	91	1.11	43	43	48	9.7	4.9	74.2	45.5			2.00846	-0.70609	#VALUE!	#VALUE!
293	0	1	30	0	0	0	1	0	48.09	5.79	0.11	1.56	73.26	2.33846													21	2.13				0	2.89	4.69	153	1.41	45	35	94	16.2	10.1	85.6	48.8			0.359835	#NUM!	#VALUE!	#VALUE!
294	1	1	32	0	0	0	1	0	379	0.01	0.01	249.97	196.83	0				12	14	49	7	3.7	74.3	47.6			0.69	0.01	0.01	239.72	202.83	0	2.36	4.91	141	1.2	233	176	437	8.9	4	69.8	43.3			2.73979	0.0130409	221	162
295	1	1	35	0	1	0	1	1	1131	0.01	0.01	2.32	144.39	0				25	35	22	28.2	20	83.4	51.5	96.3	473.3	585	0.01	0.01	3.01	35.29	0														0.286307	-0.611885	#VALUE!	#VALUE!
296	1	1	47	1	1	0	0	0	99.76	0.01	0.01	73.96	187.6	0													0.73	0.01	0.01	81.19	65.64	0	3.88	5.23	140	1.91	32	38	50	6.2	3.7	75.7	46			2.13563	-0.456064	#VALUE!	#VALUE!
297	1	1	48	1	1	0	0	0	1.36	1.58	0.01	390.53	22.52	0				21	25	13	17.5	11	74.3	49.3	98.5	357						0														#NUM!	#NUM!	#VALUE!	#VALUE!
298	1	0	32	0	1	0	0	0	7.78	0.01	0.01	4.84	232.24	0				21	13	12	21	14.5	75.4	50.6								0														#NUM!	#NUM!	#VALUE!	#VALUE!
299	1	1	39	0	1	0	1	0	1.14	0.01	0.01	214.78	48.15	2.43775				20	22	22	18.9	12.1	78	47.5			0.31	1.35	0.01	295.12	31.06	0	3.37	4.81	79	1.27	128	151	149	12.1	6.2	69.3	41.1			0.565543	-0.190395	108	129
300	1	1	33	0	0	0	1	0	1.31	1.4	0.01	169.6	94.46	0				21	44	107	12.5	8.2	83.9	49.3			0.62	4.86	0.01	227.15	181.42	0	5.12	5.01	189	1.41	29	27	70	8.4	5.1	78.3	47.8			0.32488	0.283437	8	-17
301	0	1	59	1	1	0	0	0	4.9	167.81	0.01	2.07	88.62	2.08991				25	18	30	16	10.2	75.2	46.3			1.66	234.83	0.02	2.31	228.37	0	6.24	5.18	117	1.32	34	28	25	17.6	13.3	76.5	47.4			0.470088	0.411107	9	10
302	0	1	40	1	1	0	0	0	2966	3.16	0.6	2.07	168.81	0				32	41	36	8	5	74.7	43			1262	3.95	0.4	2.11	27.8	0					23	28	24	13.1	8.5	79.3	49.5			0.371112	-0.783353	-9	-13
303	0	1	22	0	1	0	0	0	322	0.82	0.37	1.95	125.44	0				19	22	16	72.3	47.3	72.3	47.3								0														#NUM!	#NUM!	#VALUE!	#VALUE!
304	0	1	33	0	1	0	1	0	290	0.01	0.01	56.06	42.4	3.11059	5.08	203	1.57	25	27	19	6	3.7	76.9	46.3	118.6	296						0														#NUM!	#NUM!	#VALUE!	#VALUE!
305	0	1	26	0	0	0	0	0	730	0.01	0.01	265.98	85.32	3.52504				15	28	24	7.6	4.4	82.6	47.4	97.3	496	41.04	1.12	0.01	174.43	50.75	2.75051	2.4	5.18	120	1.17	67	165	116	9.6	4.7	76.8	44.5	107.7	438	1.25012	-0.225615	52	137
306	0	1	28	0	0	0	0	0	478.57	0.01	0.01	109.88	69.33	0																		0														#NUM!	#NUM!	#VALUE!	#VALUE!
307	0	0	31	0	0	0	0	0	15.71	0.01	0.01	69.13	49.88	0	4.32	250	1.12	22	10	10	7.2	4.4	78.4	44.2								0														#NUM!	#NUM!	#VALUE!	#VALUE!
308	0	1	32	0	1	0	0	0	362	0.01	0.01	203.1	186.33	0	5.41	240	1.97	33	55	55	11.9	8	72.3	46.6	112.9	411.5	35.39	0.62	0.01	110.61	42.77	0	4.54	5.18	226	1.63	78	139	77	13.3	8.4	74.4	47.8	118.7	387.1	1.00983	-0.639144	45	84
309	0	1	62	1	1	0	0	0	580	0.01	0.01	15.67	184.92	0													465	0.01	0.01	10.14	279.15	0	2.77	4.46	98	0.61	30	21	19	11	6.3	69.4	46.8			0.095975	0.178854	#VALUE!	#VALUE!
310	1	1	48	1	0	0	1	0	1.04	0.62	0.01	3.35	203.6	3.62634	5.23	187	2.83										0.41	3.55	0.01	2.12	38.86	0	3.55	4.74	124	1.63	37	31	48	10.1	5.6	77	46.6	104.9	378	0.404249	-0.719275	#VALUE!	#VALUE!
311	1	1	33	0	0	0	0	0	437	0.01	0.01	183.37	36.371	3.2833				29	41	18	11	6.9	77.9	51.9	99	363	108	0.01	0.01	131.73	135.64	0	3.33	5.12	123	1.26	70	91	38	10.7	6.2	77.3	40.4			0.607058	0.571633	41	50
312	1	0	30	0	0				400	0.01	0.01	83.5	58.48	3	4.41	196	1.47	22	10	15	17.8	11.5	79.6	48.2	119.8	241						0														#NUM!	#NUM!	#VALUE!	#VALUE!
313	1	1	34	0	0				506	1.98	0.01	36.11	92.71	2.29447	5.11	149	2.23	21	13	17	17.1	11.4	84.2	44			9.29	4.93	0.01	91.73	115.62	0	3.95	5.42	109	1.98	66	47	27	16.3	10.8	83.3	45.3			1.73613	0.0959064	45	34
314	0	1	47	1	1	0	1	0	389	4.73	0.01	174.72	199.26	0	4.74	217	1.26	22	24	26	7.2	3.4	75.7	46.3	92.2	354.1	26.66	2.76	0.01	254.48	148.8	0	10.25	4.89	246	1.11	19	20	26	7.1	4	80.3	48.8			1.16409	-0.126817	-3	-4
315	1	1	53	1	1	0	0	0	1.25	0.01	0.01	2.74	95.53	3.3784	4.96	161	1.69										0.63	0.01	0.01	2.49	58.46	0	2.5	4.54	54	0.82	26	12	32	8.4	5.2	72.6	44.5	101.1	302.7	0.297569	-0.213281	#VALUE!	#VALUE!
316	1	1	39	0	0	0	0	0	15.12	0.01	0.01	83.06	45.29	0	4.99	233	1.45	26	20	27	8.6	6	82.2	51.4	87.6	489.6	1.24	0.01	0.01	65.49	53.74	0	3.58	4.25	117	1.09	42	35	49	8.7	4.2	77.8	49.3	96.2	590.7	1.08613	0.0742953	16	15
317	1	1	36	0	1	0	1	0	1.47	0.01	0.01	3.57	224.06	0				25	59	65	14.3	8.2	81.8	48.3			0.01	310.44	0.01	2.13	143.99	0	3.06	4.78	90	1.64	62	103	300	12.9	5.9	78.1	45.6			2.16732	-0.192032	37	44
318	1	1	38	0	0	0	1	0	1.03	0.01	0.01	9.17	408.21	0				45	21	21	14.3	9.2	78.6	46.3			0.14	0.01	0.01	3.75	178.7	0	2.01	4.47	37	0.87	48	50	77	12.1	5.3	64.1	40.4			0.866709	-0.358759	3	29
319	1	0	36	0	1	0		0	21.75	0.01	0.01	2.42	210.54	1.89376	4.48	184	2.18	52	82	13	17.3	11.7	87.4	47.3								0														#NUM!	#NUM!	#VALUE!	#VALUE!
320	1	0	42	1	0	0	0	0	80.22	0.01	0.01	184.87	84.37	2.12385													1.4	0.01	0.01	372.39	302.76	0	3.54	4.32	63	0.74	38	45	31	6.9	3.7	77.9	43.6			1.75815	0.55491	#VALUE!	#VALUE!
321	1	0	33	0	0				1.8	1.99	0.01	185.77	146.42	0	4.26	215	1.96															0														#NUM!	#NUM!	#VALUE!	#VALUE!
322	1	0	52	1		0	0	0	7.6	0.71				4.43457	4.73	234	2.34	15	13	17	8.8	5.4	77.8	46.2	101	299	1.33	7.38	0.01	102.06	591.29	0	5.75	4.38	99	1.29	53	53	59	11.6	6.1	73.2	42			0.756962	#NUM!	38	40
323	0	1	50	1	1	0	0	0	86.02	0.01	0.01	165	147.84	0													9.87	0.5	0.01	94.2	163.28	0														0.940282	0.043141	#VALUE!	#VALUE!
324	1	1	41	1	0	0	0	1	0.59	0.01	0.01	46	237.57	3.95999																		0														#NUM!	#NUM!	#VALUE!	#VALUE!
325	0	0	27	0	0				749	0.01	0.01	72.44	177.78	0	4.55	264	2.36	30	37	49	9.3	5.6	79	46.8								0														#NUM!	#NUM!	#VALUE!	#VALUE!
326	1	1	31	0	0	0	0	0	1.99	0.01	0.01	9.43	73.96	0				25	31	28	21	13.2	77.3	54								0														#NUM!	#NUM!	#VALUE!	#VALUE!
327	1	1	41	1	1	0	0	0	591	0.01	0.01	2.98	152.25	0				20	23	20	7.8	4.5	81.8	48.8	107.3	384						0														#NUM!	#NUM!	#VALUE!	#VALUE!
328	1	0	53	1	0				1.27	7.29	0.01	291.59	163.86	0	4.93	203	1.73	27	20	15	7.6	4.7	83.2	47	104.4	247						0														#NUM!	#NUM!	#VALUE!	#VALUE!
329	1	0	43	1					23.28	0.01	0.01	215.56	155.89	1.93551	4.56	288	1.43	63	145	29	7.4	4	78.8	47.1			1.29	0.01	0.01	215.84	176.74	0	2.02	3.65	88	0.59	69	77	53	6.3	2.7	66.5	42.8	112	255.1	1.25639	0.0545166	6	-68
330	1	1	43	1	1				7	0.01	0.01	20.98	115.22	0				25	25	25	12.1	8.2	81.7	47.9	77.2	388.8	0.11	5.05	0.01	27.71	256.19	0	2.86	4.94	122	1.2	59	108	65	12.2	7.2	74.1	45.5			1.80371	0.347034	34	83
331	0	1	31	0		0	1	0	239	0.01	0.01	93.65	212.83	0				24	29	32	10.6	7.6	85.4	51	102.1	351	8.12	2.1	0.01	82.18	103.47	1.84696					68	103	101	7.3	4.3	81.5	45.6	102.7	321	1.46884	-0.313218	44	74
332	1	0	48	1	0	0	0	0	0.76	0.01	0.01	3.22	147.85	0				17	18	18	14.8	10.9	76.7	44.8			0.11	2.19	0.01	3.94	239.42	0														0.839421	0.209339	#VALUE!	#VALUE!
333	0	1	46	1	1	0	0	0	1551	0.01	0.72	1.7	79.38	0				19	13	17	12.1	7.8	82.7	48.1	102.9	272.5	1124	0.01	0.24	1.42	49.48	0	4.37	4.69	148	1	88	116	101	11	5.4	78.1	46.1	111.6	353.8	0.139845	-0.205281	69	103
334	0	1	38	0	1	0	0	1	377	0.01	0.01	233.15	59.22	3.8704													155	0.01	0.01	187.91	301.22	0	2.31	4.51	114	0.6	35	48	32	14.9	8.9	73	45.1	108.3	348.4	0.38601	0.706415	#VALUE!	#VALUE!
335	1	1	30	0	0				1648	0.01	0.01	264.51	203.67	2.51587				17	17	14	14.5	9.2	75.2	49.5	88.8	378.9						0														#NUM!	#NUM!	#VALUE!	#VALUE!
336	1	1	52	1	0	0	1	0	0.6	8.24	0.01	280.55	170.02	3.36549				18	19	20	17.4	7.1	70.5	46.6	84.9	444	0.36	3.87	0.01	141.15	70.81	0	6.6	4.47	160	1.66	18	14	11	24.3	15.4	69.5	46.7	89.7	398	0.221849	-0.380405	0	-5
337	1	0	43	1	1	0	0	0	692	0.01	0.01	209.59	265.75	0				26	14	21	5.3	2.8	67.5	38.3	120.8	244.8	0.14	9.11	0.01	81.48	122.9	0	3.23	3.71	68	0.89	83	51	101	12.5	6.6	71.2	44.7	110.7	272.3	3.69398	-0.334921	57	37
338	0	0	30	0	1	0	1	0	1235	0.01	0.01	3.29	140.88	0													441	0.01	0.01	2.17	95.49	0	3.91	4.23	164	1.07	116	158	135	8.5	4.3	79.6	47.8	105.9	301	0.447228	-0.168891	#VALUE!	#VALUE!
339	0	1	30	0	1	0	0	0	70.72	0.01	0.01	165.51	99.17	4.25042				21	11	12	28.7	14.8	74.4	49.5			1.49	0.01	0.01	148.01	91.52	0	3.16	4.29	92	1	44	34	23	21.3	9.9	73.2	44.1			1.67636	-0.0348643	23	23
340	0	1	37	0	0	0	1	0	54.87	0.01	0.01	125.43	62.9	0	5.63	166	1.54	22	34	31	12.9	8.6	76	46.1	91.2	374.8						0														#NUM!	#NUM!	#VALUE!	#VALUE!
341	1	0	39	0	0				1.59	0.01	0.01	120.88	114.25	2.75128				15	10	11	6.6	3	69.9	45.2	110	241	0.22	7.99	0.01	247.02	173.95	0	3.3	4.14	107	0.8	125	182	115	9.8	4.6	74.5	46.5	112.5	243.5	0.858974	0.182568	110	172
342	1	1	45	1	0	0	1	0	3.49	0.19	0.01	159.62	73.86	0				27	44	144	20.5	13	73.7	47.1	97.7	304.1	0.12	1.57	0.01	177.51	107.31	0	4.04	4.64	141	1.37	49	119	155	13.3	7.7	70.4	42.1			1.46364	0.162231	22	75
343	1	0	41	1	0				70.8	0.01	0.01	47.65	141.16	0																		0														#NUM!	#NUM!	#VALUE!	#VALUE!
344	1	0	37	0	1	0	0	0	254	0.01	0.01	94.24	112.16	0	4.5	150	1.09	19	20	15	8.4	3.9	73	46.6	119.9	114	184	0.01	0.01	67.61	196.03	0	1.56	3.59	103	0.67	45	37	24	9.5	4.3	66	40.4	116.8	157.1	0.140016	0.242485	26	17
345	0	0	45	1	0				31.13	0.41	0.01	134.55	227.92	0													8.13	0.01	0.01	80.75	253.22	0	2.21	3.64	98	0.95	39	49	24	9.3	4.6	73.1	44.6			0.583089	0.0457156	#VALUE!	#VALUE!
346	1	1	32	0	0	0	0	0	453	0.01	0.01	44.83	89.12	3.55751													1.09	0.01	0.01	24.68	167.87	0	2.9	4.05	76	1.5	87	150	150	11.2	5.9	72.4	47.4	127.3	228.7	2.61867	0.274998	#VALUE!	#VALUE!
347	0	1	32	0		0	0	0	2126	0.01	0.01	103.45	99.87	2.6149				37	77	26	14.3	8.9	75.8	48.1	95.7	463.8	1.65	0.01	0.01	175.07	123.28	0	2.53	5.56	101	1.05	183	445	181	12.8	7.4	75	45.7	115.4	456.8	3.11008	0.0914576	146	368
348	1	0	25	0	0				27.15	3.12				0													0.01	2.53				0	2.05	4.37	126	0.88										3.43377	#NUM!	#VALUE!	#VALUE!
349	1	1	30	0	0	0		0	124.7	0.01	0.01	177.48	142.05	0				28	33	15	16.7	9.7	82.5	50.3			49.01	0.01	0.01	345.66	184.68	0	3.55	5.17	124	1.15	62	87	30	16	9.6	79.1	46.6	124.9	365.6	0.405582	0.113979	34	54
350	1	1	36	0	0	0	1	0	7.81	0.01	0.01	4.6	116.76	3.28556	5.24	189	2.06	42	83	41	11	6.4	71.9	46.1								0														#NUM!	#NUM!	#VALUE!	#VALUE!
351	1	1	32	0	0				96.35	3.12	0.01	131.87	124.95	0	5.23	183	1.28	23	20	19	19	12.8	75.3	48.7	85.4	305.2	1.35	6.04	0.01	108.22	164.03	0	1.93	5.2	91	0.72	71	94	58	9.6	5.2	75.5	47.6	99.7	335.4	1.85352	0.118187	48	74
352	1	1	52	1	0				288	0.01	0.01	41.54	77.16	1.83822	4.95	49	1.15	28	33	20	8.7	4.6	74.1	41.2	98.7	229	0.34	2.9	0.01	20.14	122.48	0	2.44	4.58	38	0.75	27	35	34	8.7	6.2	74.8	43.4	97.6	215	2.92791	0.200673	-1	2
353	0	0	33	0	0	0	0	0	5653	0.01	0.01	112.05	79.97	3.48144	4.76	130	1.16	19	25	25	12.5	7.7	77.4	44.1			221.27	0.01	0.01	82.55	107.75	0	3.97	3.83	124	1.26	39	47	40	6.6	3.3	70	38			1.40736	0.12949	20	22
354	1	0	39	0	0				47.84	0.01	0.01	82.16	77.68	0				20	14	15	7.3	4.5	82.5	46.5	92.7	205.8	0.44	32.65	0.01	173.39	140.16	0	2.19	3.97	131	0.7	101	91	42	8.5	5.1	76.6	41	97.7	227.7	2.03634	0.256315	81	77
355	1	1	33	0	0				12.89	0.01	0.01	253.08	206.32	0				32	27	20	12.6	7.7	77.1	49.8								0														#NUM!	#NUM!	#VALUE!	#VALUE!
356	0	0	27	0	1	0	0	0	10.88	0.01	0.01	7.37	255.83	3.50106													2.21	2.52	0.01	4.02	119.23	0	2.82	4.85	150	0.87	72	86	29	7.2	4.3	75.6	44.3			0.692237	-0.331566	#VALUE!	#VALUE!
357	1	1	40	1	0	0	0	0	40.62	0.01	0.01	12.55	137.15	0				18	22	20	6.8	4.1	77.2	47.2	94.2	386.5						0														#NUM!	#NUM!	#VALUE!	#VALUE!
358	0	1	45	1					1411	0.01	0.04	2.45	246.12	0				18	19	27	13.8	9.3	74.9	48.7	102	288.7						0														#NUM!	#NUM!	#VALUE!	#VALUE!
359	0	1	47	1	1	0	0	0	136	0.01	0.01	3.21	171.25	0				28	57	23	7	4.4	74.9	47.5	86.2	512	1.1	0.01	0.01	1.74	21.95	0	2.86	4.48	118	1.08	35	31	50	8.8	5.4	73	45.3			2.09215	-0.892196	7	-26
360	0	1	40	1	0				1.11	2.55	0.01	6.67	176.07	0	5.03	186	1.57										1.39	1.45	0.01	6.84	159.32	0	4.06	4.82	207	1.82	102	137	229							-0.0976918	-0.0434151	#VALUE!	#VALUE!
361	1	0	54	1	1	0	0	0	383.82	0.01	0.01	64.3	163.76	0																		0														#NUM!	#NUM!	#VALUE!	#VALUE!
362	1	1	48	1	1	0	0	0	12.59	2.56	0.01	116.63	88.92	3.88986													1.36	9.27	0.01	175.75	148.7	0	2.87	4.31	162	0.63	32	13	47	8.4	4.6	72.1	42.4	112.3	194.3	0.966487	0.223312	#VALUE!	#VALUE!
363	0	0	33	0	0	0	0	0	16500	0.01	0.01	139.48	153.71	3.08636																		0														#NUM!	#NUM!	#VALUE!	#VALUE!
364	0	1	34	0	0				41.52	0.01	0.01	5.02	22.62	0	5.06	225	2.12	27	27	23	14.5	9.4	80.1	47.4	113.8	410.7						0														#NUM!	#NUM!	#VALUE!	#VALUE!
365	0	1	45	1	0	0	0	0	8.74	0.01	0.01	63.94	54.58	3.42488				19	22	18	8.6	3.6	76.7	48.2	103.1	285	1.28	1.33	0.01	85.65	133.73	0	2.99	4.32	161	0.87	20	24	49	9.4	5.6	76.9	45.5			0.834301	0.389195	1	2
366	1	1	44	1	0	0	0	0	64.03	0.01	0.01	108.77	183.83	0													2.22	1.18	0.01	169.85	262.47	0	1.87	5.11	108	1.11	93	80	65	12.5	7.3	70.9	44.4			1.46003	0.154663	#VALUE!	#VALUE!
367	0	0	33	0		0	0	0	1.06	6.14	0.01	52.27	193.79	2.05308	4.4	242	2.24	21	11	21	11.9	7.2	74.6	44.9	125	225						0														#NUM!	#NUM!	#VALUE!	#VALUE!
368	0	1	40	1	0				9.5	0.16	0.01	96.68	61.89	2.54777	5.02	250	2.11	32	61	52	14.1	8.9	76.2	49	101.1	453.7	1.77	0.01	0.01	67.45	68.17	0	4.93	5.04	164	1.58	82	148	140	10.3	4.8	79.2	49.3	112.8	386.3	0.72975	0.0419728	50	87
369	1	1	39	0	0	0	1	0	2.5	0.01				4.06446				30	52	89	8.6	5.6	83.3	47.9			0.02	0.01	0.01	59.75	44.81	1.82866														2.09691	#NUM!	#VALUE!	#VALUE!
370	0	0	47	1	0	0	0	0	424	0.01	0.01	67.96	39.35	5.13672				23	13	13	11.7	7.3	73.3	40.9	101.3	255						0														#NUM!	#NUM!	#VALUE!	#VALUE!
371	0	1	35	0	0				322	5.97	0.01	422.98	216.31	0				26	40	46	10.8	6.8	80	46.5	96.3	488.4	1.12	7.47	0.01	117.12	74.83	0	3.41	4.86	103	1.31	47	52	52	11.4	7.1	74	46.3	110.6	379.9	2.45864	-0.461001	21	12
372	1	1	30	0	0				8.14	0.19	0.01	38.05	117.38	0	5.56	153	1.28	89	147	61	9.4	5.8	75.5	48.2	127.4	294						0														#NUM!	#NUM!	#VALUE!	#VALUE!
373	1	1	47	1	1	0	1	0	63.98	0.01	0.01	2.43	108.44	0	4.68	139	1.34	47	49	68	12.5	7.8	69.8	43.4	113	488	1.01	0.01	0.01	2.4	79.34	0	4.34	4.62	144	1.62	16	22	35	11.6	5.9	77	45.1	106.8	383.6	1.80172	-0.135697	-31	-27
374	1	1	47	1	0	0	0	0	128.58	0.01	0.01	142.68	151.62	3.42975				19	32	22	38.6	27.1	75.7	47.3	99.2	437.2						0														#NUM!	#NUM!	#VALUE!	#VALUE!
375	1	0	43	1	0	0	0	0	134.81	0.01	0.01	166.61	247.32	3.55991				16	13	23	9	5.4	79.9	50.8			0.22	1.27	0.01	59.94	235.29	2.66181	2.08	4.23	60	0.84	191	237	400	10	4.1	71.9	45.5	112	191	2.7873	-0.0216558	175	224
376	0	1	45	1					72.98	0.01	0.01	128.2	138.79	2.49415				25	31	26	7.5	4.6	74.8	45.4	80.5	286	17.94	0.01	0.01	141.01	116.41	0	1.99	4.23	74	0.9	55	26	89	8.5	3.4	65.9	37.9	98.3	226.9	0.609381	-0.0763679	30	-5
377	0	1	31	0	0				488	0.34	0.01	147.43	225.15	2.11394	5.36	195	2.93	18	27	42	11.5	7.4	75.2	50								0														#NUM!	#NUM!	#VALUE!	#VALUE!
378	0	1	39	0		0	1	0	73.81	0.01	0.01	108.08	86.69	0				21	24	29	9.4	5.9	79.6	49.5			0.42	0.01	0.01	226.67	233.51	0	3.22	4.77	161	1.41	90	149	111	8.3	4	76.9	42.9			2.24487	0.430336	69	125
[truncated: 6 more columns]

## Sheet: codebook
Variable name	Meaning	Categorical variable
ID-24 week	Serial Number
Response	Response at 24 weeks of treatment	1=response; 0=no response
SEX	Sex	1=male; 0=female
AGE	Age
age>50y	Is the age greater than 50 years old?	1=yes;0=no
NAs	Use Nucleos (t)ide Analogues or not	1=yes;0=no
Cirrhosis	With or without liver cirrhosis	1=yes;0=no
Fatty liver	With or without fatty liver	1=yes;0=no
Splenomegaly	With or without enlarged spleen	1=yes;0=no
HBsAg	Hepatitis B Surface Antigen (ng/mL) at baseline
HBsAb	Hepatitis B Surface Antibody(mIU/mL) at baseline
HBeAg	Hepatitis B e Antigen (NcU/mL) at baseline
HBeAb	Hepatitis B e Antibody (NcU/mL) at baseline
HBcAb	Hepatitis B Core Antibody (NcU/mL) at baseline
DNA	HBV DNA (log10 IU/mL) at baseline
RBC	Red Blood Cell (10 ^12 /L) at baseline
PLT	Platelet (10 ^9 /L) at baseline
LYM	Lymphocyte (10 ^9 /L) at baseline
AST	Aspartate Aminotransferase (U/L) at baseline
ALT	Alanine Aminotransferase (U/L) at baseline
Y-GT	Gamma-Glutamyl Transferase (U/L) at baseline
TBIL	Total Bilirubin (umol /L) at baseline
IBIL	Indirect Bilirubin (umol /L) at baseline
TP	Total Protein (g/L) at baseline
Alb	Albumin (g/L) at baseline
eGFR	Estimated Glomerular Filtration Rate (mL/min/1.73m²) at baseline
UA	Uric Acid (umol /L) at baseline
12HBsAg	Hepatitis B Surface Antigen (ng/mL) at 12 weeks
12HBsAb	Hepatitis B Surface Antibody(mIU/mL) at 12 weeks
12HBeAg	Hepatitis B e Antigen (NcU/mL) at 12 weeks
12HBeAb	Hepatitis B e Antibody (NcU/mL) at 12 weeks
12HBcAb	Hepatitis B Core Antibody (NcU/mL) at 12 weeks
12DNA	HBV DNA (log10 IU/mL) at 12 weeks
12WBC	White Blood Cell (10 ^12 /L) at 12 weeks
12RBC	Red Blood Cell (10 ^12 /L) at 12 weeks
12PLT	Platelet (10 ^9 /L) at 12 weeks
12LYM	Lymphocyte (10 ^9 /L) at 12 weeks
12AST	Aspartate Aminotransferase (U/L) at 12 weeks
12ALT	Alanine Aminotransferase (U/L) at 12 weeks
12Y-GT	Gamma-Glutamyl Transferase (U/L)at 12 weeks
12TBIL	Total Bilirubin (umol /L)at 12 weeks
12IBIL	Indirect Bilirubin (umol /L) at 12 weeks
12TP	Total Protein (g/L) at 12 weeks
12Alb	Albumin (g/L) at 12 weeks
12eGFR	Estimated Glomerular Filtration Rate (mL/min/1.73m²) at 12 weeks
12UA	Uric Acid (umol /L) at 12 weeks
cHBsAg	The change in HBsAg from week 12 to the baseline value
cHBcAb	The change in HBcAb from week 12 to the baseline value
cAST	The change in AST from week 12 to the baseline value
cALT	The change in ALT from week 12 to the baseline value
cY-GT	The change in Y-GT from week 12 to the baseline value
Ctbil	The change in TBIL from week 12 to the baseline value
L12HBsAg	Hepatitis B Surface Antigen (log 10 ng/mL) at 12 weeks
L12HBeAb	Hepatitis B e Antibody (log 10 NcU/mL) at 12 weeks
L12HBcAb	Hepatitis B Core Antibody (log 10NcU/mL) at 12 weeks
L12HBeAg	Hepatitis B e Antigen (log 10 NcU/mL) at 12 weeks
