# Supplementary material for: Predicting loss of hepatitis B surface antigen and evaluating the durability of functional cure induced by pegylated interferon alpha: insights from a real-world study
Source: PeerJ. 2026 Jan 21;14:e20587. doi: 10.7717/peerj.20587 (PMC12831512; doi:10.7717/peerj.20587)
Supplement: Supplemental Information 3 [file peerj-14-20587-s003.xlsx]

## Sheet: data
Response	id-48w	AGE	SEX	NAs	Cirrhosis	Fatty liver	Splenomegaly	HBsAg	LHBsAg	HBsAb	HBeAg	HBeAb	LHBeAb	HBcAb	LHBcAb	DNA	WBC	RBC	PLT	LYM	AST	ALT	Y-GT	TBIL	IBIL	TP	Alb	eGFR	UA	12HBsAg	L12HBsAg	12HBsAb	12HBeAg	12HBeAb	L12HBeAb	12HBcAb	L12HBcAb	12HBV DNA	12WBC	12RBC	12PLT	12LYM	12AST	12ALT	12Y-GT	12TBIL	12IBIL	12TP	12Alb
1	1	47	1	1	0	0	0	278	2.44404	0.01	0.01	142.1	2.15259	109.25	2.03842	5.53275					55	106	28	10.9	7	79.8	46.3			0.09IU	#VALUE!							0	3.37		165		30	14
1	2	52	0	0	0	0	0	7.7	0.886491	0.62	0.01	213.39	2.32917	120.18	2.07983	0					15	11	14	9.3	5.8	71.9	43.9			2.52	0.401401	3.58	0.01	261.45	2.41739	113.42	2.05469	0	5.59	4.55	134	1.92
1	3	29	1	1	0	1	0	18.4	1.26482	0.98	0.57	0.03	-1.52288	8.04	0.905256	0															#NUM!				#NUM!		#NUM!	0
1	4	42	1	1	0	1	0	68.75	1.83727	0.73	0.01	7.33	0.865104	215.08	2.3326	0	4.51	4.88	235	1.65	15	9	15	14.2	9.2	71.2	45.3			1.21	0.0827854	0.59	0.01	13.85	1.14145	97.1	1.98722	0	2.55	4.21	146	1.26	31	33	30	9.7	5.5	70.1	43.7
1	5	47	1	1	0	0	0	1.92	0.283301	0.01	0.01	56.22	1.74989	223.9	2.35005	0															#NUM!				#NUM!		#NUM!	0
1	6	38	1	1	0	1	0	16.82	1.22583	0.01	0.01	35.27	1.54741	47.87	1.68006	2.94349															#NUM!				#NUM!		#NUM!	0
1	7	38	1	0	0	1	0	8.46	0.92737	0.01	0.01	203.68	2.30895	299.14	2.47587	2.08636					21	22	25	20.4	14.3	85.4	50.5			1.27	0.103804	0.43	0.01	131.2	2.11793	203.44	2.30844	0	3.83	4.69	127	0.97	43	50	52	13.2	8.6	72	44
1	8	48	1	1	0	1	0	515	2.71181	0.01	0.01	146.57	2.16605	73.26	1.86487	0					27	23	75	10.9	7.2	77	50			4.04	0.606381	0.01	0.01	227.96	2.35786	157.45	2.19714	0	4.1	4.52	183	1.37	33	24	127	12.7	7.9	77.5	46.2
1	9	37	1	1	0	0	0	3766	3.57588	0.01	0.01	173.82	2.2401	112.36	2.05061	0	6.22	5.29	180	1.97	21	21	11	7.1	4	75.9	45.6	116.8	376		#NUM!				#NUM!		#NUM!	0
1	10	47	0	0	0	0	0	16.58	1.21958	1.53	0.01	137.04	2.13685	109.9	2.041	2.26482					26	17	14	10.5	6.4	83	47.5			0.51	-0.29243	4.41	0.01	161.12	2.20715	208.04	2.31815	0	2.11	4.3	98	0.61	86	92	51	7.1	4.1	73.4	43.9
1	11	25	1	1	0	1	0	54.52	1.73656	0.01	0.01	24.02	1.38057	181.42	2.25869	2.22272					21	41	26	8.6	5	78.7	48.9				#NUM!				#NUM!		#NUM!	0
1	12	35	1	0	0	1	0	364	2.5611	0.01	0.01	220.55	2.34351	134.18	2.12769	3.9196					21	25	26	17.2	11.3	79.8	48	96.3	456.4	1.28	0.10721	0.01	0.01	160.09	2.20436	101.42	2.00612	2.4216	3.67	4.83	84	0.61	296	208	219	18.5	9.4	70	43.2
1	13	47	1	1	0	0	0	16500	4.21748	0.01	0.01	119.55	2.07755	112.71	2.05196	0					16	16	18	11.3	6.8	74.9	48.6			1.24	0.0934217	0.01	0.01	44.98	1.65302	91.26	1.96028	0	2.49	4.82	87	1.02	49	68	124	14.1	6.9	69.7	42.7
1	14	28	0	1	0	0	0	87.99	1.94443	0.27	0.11	2.69	0.429752	79.34	1.89949	0					16	20	10	7.7	4.5	79.9	45.2			1.71	0.232996	6.59	0.05	2.26	0.354108	105.11	2.02164	0	3.3	5.14	161	1.05	66	29	33	6	3.8	75.6	42.1
1	15	36	1	1	0	1	0	697	2.84323	0.01	0.01	227.15	2.35631	173.2	2.23855	0					25	22	25	17.7	12	77.4	48.7			2.05	0.311754	0.01	0.01	58.03	1.76365	45.17	1.65485	0	3.21	5.11	102	0.78	55	76	43	15.5	10.2	68.5	42.6
1	16	38	1	1	0	0	0	4.13	0.61595	0.01	0.01	122.63	2.0886	158.69	2.20055	0					24	40	26	12.9	8.3	81.1	48.5				#NUM!				#NUM!		#NUM!	0
1	17	47	1	1	0	0	0	35	1.54407				#NUM!		#NUM!	0														0.05	-1.30103	0.01	0.01	32.08	1.50623	342.79	2.53503	0	3.53	4.26	104	1.54	82	30	104	11.3	6	78.4	47.5
0	18	35	0	1	0	0	0	1947	3.28937	1.76	0.31	2.24	0.350248	119.5	2.07737	0					28	24	8	9	5.1	80.9	49.5	114.6	295.3	36.86	1.56656	3.06	0.01	3.81	0.580925	539.26	2.7318	0	2.17	3.53	126	0.89	68	82	45	7.6	4.1	73.9	45.6
1	19	33	1		0	0	0	11.38	1.05614	0.96	0.01	162.26	2.21021	54.78	1.73862	2.63144	7.07	5.83	231	2.45	18	15	33	13.1	9	72.3	46.8			1.01	0.00432137	0.97	0.01	190.63	2.28019	191.75	2.28274	0	3.6	5.35	125	1.73	24	44	67	14.8	8.9	67.9	42.6
1	20	32	1	0	0	1	0	141.53	2.15085				#NUM!		#NUM!	3.79239														868	2.93852	0.01	0.14	2.59	0.4133	464.48	2.66697	0
1	21	30	1	1	0	0	0	92.71	1.96713	0.01	0.27	2.38	0.376577	218.05	2.33856	0														0.59	-0.229148	1.92	0.14	1.86	0.269513	53.88	1.73143	0	3.27	4.83	88	1.22	73	102	82	7.7	4.1	77.4	46.9
1	22	50	1	1	0	0	0	5.15	0.711807	8.81	0.01	202.79	2.30705	172.36	2.23644	0					25	18	13	18.5	13.3	71	44.9			0.41	-0.387216	3.79	0.01	174.33	2.24137	135.1	2.13066	0	4.66	4.66	117	1.79	53	45	56	10.3	6.1	68.2	40.9
1	23	36	1	1		1		342	2.53403	0.01	0.01	241.43	2.38279	253.23	2.40352	0					25	28	51	15.7	9.7	78.2	49.7			166	2.22011	0.01	0.01	87.32	1.94111	73.44	1.86593	0	4.16	5.48	99	1.85	35	27	170	13.3	7.1	74.8	45.4
1	24	31	1	1		1		68.39	1.83499	7.14	0.11	4.3	0.633468	210.53	2.32331	0					18	34	44	8.7	5.3	78.1	46.9	127.3	339	0.42	-0.376751	2.89	0.1	2.05	0.311754	220.37	2.34315	0	2.9	4.68	4.68	1.44	69	72	89	13.3	7.7	72.9	48.9
1	25	32	1	1				64.1	1.80686				#NUM!		#NUM!	0					35	84								59.1	1.77159	0.01	0.01	148.96	2.17307	150.35	2.1771	0
1	26	54	0	1	0	1	0	1.31	0.117271	0.01	0.01	98.95	1.99542	127.31	2.10486	0					18	13	16	17.8	12.5	77.9	47.1			0.53	-0.275724	0.01	0.01	54.79	1.7387	79.57	1.90075	0
1	27	38	1	1	0	0	0	244	2.38739	0.01	0.02	3.83	0.583199	281.7	2.44979	1.94201					32	37	30	10.7	6.1	75.5	46.8				#NUM!				#NUM!		#NUM!	0
1	28	27	1	0	0	0	0	11.48	1.05994	0.01	0.01	194.8	2.28959	114.77	2.05983	0					26	32	48	12.4	7.3	79.2	43.8			1.14	0.0569049	2.39	0.01	132.26	2.12143	125.17	2.0975	0	4.95	5.28	88	3.32	61	49	189	18.7	10.4	81.3	47.6
1	29	31	0	0	0	0	0	11.76	1.07041	0.01	0.01	223.91	2.35007	124.42	2.09489	0					23	23	9	14.1	10.3	74.3	47.2			0.34	-0.468521	0.01	0.01	127.69	2.10616	64.61	1.8103	0	2.96	4.34	110	1.38	48	27	119	8	4.7	70.6	44.3
1	30	34	1	0	0	1	0	3.09	0.489958	0.38	0.01	183.46	2.26354	104.46	2.01895	0					32	62	44	16.2	9.8	75.9	46.5	96.3		0.31	-0.508638	0.01	0.01	239.45	2.37921	89.1	1.94988	0	3.54	5.25	134	1.3	48	85	86	11.7	6.5	72.4	45.6
1	31	40	1	1	1	0	1	506.1	2.70424	0.01	0.01	2.19	0.340444	121.56	2.08479	0					21	20	19	15.1	10.1	77.5	47.7			158	2.19866	0.01	0.01	2.26	0.354108	81.86	1.91307	0	4.06	5.04	78	0.9	79	58	47	17.7	10.2	72.6	45.1
0	32	32	0	1	0	0	0	69.73	1.84342	0.01	0.01	53.69	1.72989	84.62	1.92747	0															#NUM!				#NUM!		#NUM!	0
1	33	48	0	1	0	0	0	1360	3.13354	1.98	0.01	475.28	2.67695	102.67	2.01144	0														1.03	0.0128372	0.01	0.01	100.73	2.00316	90.88	1.95847	0	2.63	4.08	80	0.95	119	63	145	12.2	6	68.1	42.9
1	34	34	1	1				2775	3.44326	0.01	0.01	120.37	2.08052	123.85	2.0929	2.55751														393	2.59439	0.01	0.01	153.78	2.1869	100.49	2.00212	2.40483	3.98	4.25	83	0.76	164	57	99	9.2	3.8	75.7	46.1
1	35	39	1	1	0	0	0	15.09	1.17869	0.92	0.01	2.15	0.332438	214.58	2.33159	0	6.44	5.48	142	2.12	26	34	17	12.8	7.9	76.5	49.4			1.15	0.0606978	26.3	0.01	2.26	0.354108	120.78	2.082	0	3.32	4.83	55	1.16	45	52	34	8.9	4.7	75.8	45.7
1	36	51	1	0	0	0	0	1.41	0.149219	0.01	0.01	2.91	0.463893	170.02	2.2305	2.36736														0.56	-0.251812	1.35	0.01	3.33	0.522444	219.86	2.34215	0	3.6	4.02	101	1.23	33	21	36	12.8	7	82.1	44.9
0	37	20	0	0				735	2.86629	0.01	0.01	6.92	0.840106	91.57	1.96175	4.80072					27	35	18	4.2	2.4	75	47.8	133.3	299		#NUM!				#NUM!		#NUM!	0
1	38	32	0	1	0	0	0	57.76	1.76163	0.01	0.01	3.72	0.570543	234.35	2.36986	0															#NUM!				#NUM!		#NUM!	0
1	39	54	1	1	0	1	0	5.01	0.699838	0.01	0.01	3.92	0.593286	102.74	2.01174	0														0.57	-0.244125	0.01	0.04	1.98	0.296665	70.97	1.85107	0
1	40	30	1	1	0	0	0	2031	3.30771	0.01	0.01	118.87	2.07507	94.6	1.97589	0					19	11	13	13.5	8.9	77.3	53			142.18	2.15284	0.01	0.01	71.1	1.85187	139.11	2.14336	0	2.4	4.47	127	1	99	90	84	9.6	5.5	69.3	46.5
1	41	56	1	1	0	0	0	5.67	0.753583	0.01	0.01	129.12	2.11099	169.7	2.22968	0															#NUM!				#NUM!		#NUM!	0
0	42	25	1	1	0		0	16500	4.21748	0.94	105.84	0.03	-1.52288	115.08	2.061	0														7788	3.89143	0.01	10.42	2.16	0.334454	120.13	2.07965	0
1	43	32	0	0	0	0	0	237	2.37475	0.15	0.01	158.15	2.19907	297.51	2.4735	1.98677					16	12	18	9.1	5.3	78.3	46.4			0.03	-1.52288	94.35	0.01	138.46	2.14132	91.36	1.96076	0
1	44	31	1	0	0	0	0	195.11	2.29028	4.05	0.25	2.54	0.404834	153.72	2.18673	0	6.02	5.26	223	2.53	19	20	50	7.5	4.7	72.4	45.2	111.8	422.1		#NUM!				#NUM!		#NUM!	0
1	45	44	1	0	0	1	0	101	2.00432	0.08			#NUM!		#NUM!	0					19	20	23	15.5	10.6	78.8	49.1			1.13	0.0530784	0.01	0.01	119.41	2.07704	277.9	2.44389	0	3.16	5.11	134	1.58	50	27	39	16.7	10.3	81.3	49.4
1	46	50	1	1	0	1	0	16.55	1.2188	0.01	0.01	110.28	2.0425	134.79	2.12966	0															#NUM!				#NUM!		#NUM!	0
1	47	28	1	1	0	0	0	24.57	1.39041	0.01	0.34	2.57	0.409933	29	1.4624	0														2.59	0.4133	1.17	0.26	2.42	0.383815	34.13	1.53314	0	3.8	4.68	116	1.1	41	75	49	9.5	6.7	77.1	49.1
0	48	38	1	1	0	1	0	1198	3.07846	0.01	0.01	196.79	2.294	147.24	2.16803	2.04922					19	26	25	15.8	10.8	72.2	45.4			1163	3.06558	0.01	0.01	44.29	1.64631	192.35	2.28409	0	2.4	5.18	96	1.25	51	25	120	13.5	7.6	69.8	45.5
1	49	38	1	1	0	0	0	1445	3.15987	0.01	0.01	7.52	0.876218	123.62	2.09209	0					15	14	18	8.9	5.3	67.9	45.7			12.33	1.09096	0.01	0.01	4.6	0.662758	197.87	2.29638	0	4.1	4.82	80	1.41	48	51	74	8.7	4.8	63.1	39
1	50	34	1	0	0	1	0	1125	3.05115	0.01	0.01	230.62	2.3629	124.72	2.09594	4.7348					24	36	25	8.3	5.3	75.9	49.5			3.27iu	#VALUE!	3.03	0.38s	0.01s	#VALUE!	8.30s	#VALUE!	0	2.04	5.17	72	0.98	51	39	45	13.6	8.1	72.4	47.3
1	51	38	0	1	0	1	0	8104	3.9087	0.01	80.99	0.01	-2	274.14	2.43797	0														2813	3.44917	0.01	10.57	2.03	0.307496	114.14	2.05744	0	1.69	4.31	74	0.74	76	73	23	11.5	5.6	72.9	46.5
1	52	43	1	1	0	1	0		#NUM!	0.01	0.01	2.15	0.332438	265.07	2.42336	0														1.4	0.146128	1.39	0.01	3.46	0.539076	99.19	1.99647	0					44	21	77	10.8	5.6	75.3	45
1	53	42	0	1	0	0	0	967	2.98543	0.01	0.01	13.32	1.1245	178.3	2.25115	0					25	21	20	8	4.8	73.6	47.6			0.14	-0.853872	9.8	0.01	3.97	0.598791	256.23	2.40863	0
0	54	52	1					1217	3.08529	0.01	0.01	2.96	0.471292	116.66	2.06692	0					22	18	13	16	11	83.9	46.8			36.78	1.56561	0.01	0.01	2.72	0.434569	124.22	2.09419	0	3.3	4.17	82	1.65	81	42	61	11.2	6.3	79.7	43.5
1	55	26	0	1	0	0	0	945	2.97543	1.56	0.01	2.48	0.394452	90.64	1.95732	0														42.38	1.62716	37.98	0.01	2.29	0.359835	48.7	1.68753	0
1	56	44	1	0	0	0	0	25.069	1.39914	0.01	0.01	180.96	2.25758	112.58	2.05146	2.57403														0.01	-2	0.64	0.01	233.46	2.36821	160.03	2.2042	0	2.69	4.29	90	0.97	164	82	222	8.9	3.9	67.4	41.2
1	57	40	0	1	0	0	0	1687	3.22712	0.01	0.56	2.23	0.348305	95.58	1.98037	0														741	2.86982	0.01	0.12	2.26	0.354108	191.37	2.28187	0	4.71	4.2	187	1.04	38	44	54	7.3	4.2	76.4	44.9
1	58	41	1	1	0	0	0	472	2.67394	0.01	0.01	78.37	1.89415	40.65	1.60906	0					21	12	16	17	11	72.1	47.3	80.2	444.4	1.65	0.217484	0.01	0.01	133.39	2.12512	140.08	2.14638	0	3.2	4.2	94	0.99	126	61	155	12.3	5.6	70.6	40.9
1	59	29	0	1	0	0	0	160	2.20412	0.01	0.01	2.96	0.471292	46.02	1.66295	0					15	18	12	12.4	7.5	74.6	47.2	124.5	366	16.68	1.2222	0.01	0.01	4.43	0.646404	306.79	2.48684	0	3.73	4.17	95	1.37	54	102	47	12.3	7.1	73.1	45.9
1	60	36	1	1	0	0	0	66.64	1.82373	0.01	71.88	0.88	-0.0555173	136.85	2.13624	0	6.28	5.02	277	2.07	19	22	25	11.5	6.8	76.1	45.3			37.74	1.5768	0.01	34.17	2.52	0.401401	198.36	2.29745	0	3.3	4.48	139	1.44	30	50	31	6.7	3.7	69.6	28.5
1	61	44	1	1	0	0	1	22.61	1.3543	0.01	0.01	150.24	2.17679	138.247	2.14066	0					20	20	13	13.5	8.7	72.7	46.8	104.4	365.1	0.49	-0.309804	7.44	0.01	219.21	2.34086	212.77	2.32791	0	2.96	4.7	152	1.08	31	38	22	11	6.3	66.1	45.6
1	62	31	1	0	0	0	0	1.64	0.214844	0.01	0.01	13.01	1.11428	271.29	2.43343	3.68753														0.01	-2	1.46	0.01	5.69	0.755112	121.49	2.08454	0	3.28	4.46	113	1.04	40	36	35	19.4	11	75.4	44.1
1	63	32	1	1	0	1	0	42.56	1.629	0.01	0.07	3.54	0.549003	90.66	1.95742	0														42.6	1.62941	0.01	0.04	1.85	0.267172	52.76	1.7223	0
1	64	52	0	1				89.35	1.95109	0.01	0.01	262.1	2.41847	206.71	2.31536	0					23	14	11	7.1	4.2	82.5	48.4			3.29	0.517196	0.01	0.01	129.44	2.11207	86.95	1.93927	0	3.69	3.54	194	1.76	49	42	15	6.3	3.7	85.6	46
1	65	33	0	0	0	0	0	328	2.51587	8.23	0.01	266	2.42488	146.93	2.16711	2.96426					18	16	12	10.9	6.2	79.8	49.6			0.32	-0.49485	7.17	0.01	115.75	2.06352	106.17	2.026	0	2.58	4.52	103	0.78	91	84	91	6.5	3.1	77.1	44.7
0	66	30	1	1	0	0	0	252	2.4014	0.01	0.04	2.58	0.41162	78.3	1.89376	0					23	20	15	14.3	9.1	75.9	49.9			6.06	0.782473	0.01	0.01	1.44	0.158362	45.19	1.65504	0	3.68	4.45	165	1.2	25	28	43	8.5	4.5	69.9	48.2
1	67	40	0	0	0	0	0	16.31	1.21245	6.12	0.01	191.38	2.2819	97.04	1.98695	4.11727					22	13	19	8.3	5.3	77.2	44.1				#NUM!				#NUM!		#NUM!	0
1	68	41	1	1	0	0	0	3.78	0.577492	6.18	0.01	72.56	1.8607	106.51	2.02739	0														0.56	-0.251812	7.69	0.01	148.67	2.17222	223.13	2.34856	0	4.7	4.88	96	1.02	44	13	43	10.4	4.9	70.3	39
1	69	38	0	1	0	1	0	350	2.54407	1.04	0.52	1.1	0.0413927	37.31	1.57183	0					16	16	13	15	9.3	73.9	45.9				#VALUE!				#NUM!		#NUM!	0
1	70	44	1	1	0	1	0	317.86	2.50224	0.01	0.01	22.53	1.35276	239.88	2.37999	2.15229					28	49	25	21.3	15.3	73.8	46.5			0.52	-0.283997	3.97	0.01	12.68	1.10312	335.67	2.52591	0	2.43	5.05	92	0.86	145	123	107	23	13.6	73.3	46.2
1	71	40	1	1	0	1	0	125	2.09691	0.01	0.18	1.56	0.193125	25.31	1.40329	0															#NUM!				#NUM!		#NUM!	0
1	72	30	0		0	0	0	1431	3.15564	4.73	0.01	203.5	2.30856	190.36	2.27958	0														2.12	0.326336	139.23	0.01	145.28	2.16221	112.4	2.05077	0
1	73	40	0	1	0	0	0	66	1.81954	0.01	0.02	2.17	0.33646	43.73	1.64078	0														0.22	-0.657577	2.41	0.01	2.27	0.356026	35.73	1.55303	0	3.37	4.97	111	1.19	76	30	30	5.3	2.7	79.5	46.4
1	74	29	1	1				35.71	1.55279	0.01	0.03	2.55	0.40654	140.35	2.14721	0					23	28	17	12.8	8.1	74.1	47.4			0.01	-2	25.13	0.01	3.02	0.480007	214.06	2.33054	0	4.24	5.17	61	1.92	49	57	78	7.3	4.5	67.8	24.9
1	75	36	0	1	0	0	0	1507	3.17811	3.8	0.12	2.14	0.330414	94.32	1.9746	0					44	35	9	22.6	14	81.3	46.3			18.14	1.25864	2.51	0.19	2.4	0.380211	201.9	2.30514	0	6.54	3.91	164	1.35	44	11	13	8.4	4.4	75.7	43.3
1	76	54	1	1	0	0	0	6	0.778151	0.01	0.01	43.31	1.63659	156.47	2.19443	0					23	23	21	16.3	10.5	74.6	46.3			0.8	-0.09691	0.01	0.01	13.74	1.13799	184.36	2.26567	0	2.81	4.67	68	0.7	92	104	93	16.5	9.5	77.6	47.4
1	77	33	1	1	0	0	0	0.59	-0.229148	0.41	0.01	97.15	1.98744	45.49	1.65792	0															#NUM!				#NUM!		#NUM!	0
1	78	56	1	0	0	0	0	1.29	0.11059	0.01	0.01	25.8	1.41162	120.77	2.08196	2.22789	5.39	4.98	160	1.62	24	20	16	12.2	7.4	75.6	47.7			0.59	-0.229148	0.01	0.01	12.64	1.10175	118.51	2.07375	0	3.92	4.32	110	1.17	28	19	25	12.2	6.6	75.3	41.7
1	79	45	0	1	0	0	0	639	2.8055	0.01	0.01	144.99	2.16134	88.64	1.94763	0	8.11	4.52	161	2.54	17	15	23	6.7	3.9	75.8	46.6			1.15	0.0606978	0.25	0.01	153.49	2.18608	207.81	2.31767	0	4.44	4.18	76	1.13	55	56	55	7.9	5.3	68.6	43.5
1	80	58	1	1	0	0	0	37.93	1.57898	0.01	0.01	95.05	1.97795	69.32	1.84086	0					24	16	17	14.2	8.4	77.9	49.3			0.54	-0.267606	0.01	0.01	154.5	2.18893	314.8	2.49803	0	2.47	3.96	85	1.01	81	61	38	9.4	4.8	72.1	43.9
1	81	57	1	1	0	1	0	1.28	0.10721	5.13	0.01	156.22	2.19374	228.75	2.35936	0					71	47	43	13.9	9.8	77	45.5			1.14	0.0569049	0.93	0.01	56.92	1.75526	61.28	1.78732	0	4.23	5.17	138	1.09	113	119	90	12.2	7.3	74.8	45
1	82	34	1	1	0	1	0	35.47	1.54986	1.66	0.6	2.31	0.363612	1.82	0.260071	0														0.56	-0.251812	0.01	0.27	1.49	0.173186	1.55	0.190332	0
1	83	39	0	1	0	1	0	38.73	1.58805	0.01	0.31	5.95	0.774517	191.15	2.28137	0					21	30	26	4.4	2.1	73.3	43.2			0.31	-0.508638	0.92	0.23	2.85	0.454845	136.21	2.13421	0	4.13	4.4	165	0.81	85	98	127	8.1	4.3	81.5	44.4
1	84	42	1	1	0	0	0	50.99	1.70749	0.01	0.22	3.43	0.535294	81.65	1.91196	0					25	30	18	16.8	10.5	72.7	47.8			0.53	-0.275724	0.01	0.05	2.63	0.419956	66.25	1.82119	0	2.04	4.21	97	1.03	43	42	38	10.5	6.1	69.9	44.9
1	85	40	1	1	0	0	0	20.87	1.31952	0.01	0.01	189.59	2.27782	309.84	2.49114	0					21	15	22	26.7	18.3	85.5	50.6			1.43	0.155336	1.24	0.01	69.45	1.84167	83.74	1.92293	0
1	86	38	1	1	0	1	0	208	2.31806	0.01	0.01	264.67	2.4227	54.05	1.7328	0															#NUM!				#NUM!		#NUM!	0
1	87	28	0	1	0	0	0	0.67	-0.173925	5.52	0.01	2.58	0.41162	376.06	2.57526	0															#NUM!				#NUM!		#NUM!	0
1	88	30	0	1	0	0	0	1.2	0.0791812	0.76	0.18	2.25	0.352183	336.41	2.52687	0														0.11	-0.958607	9.64	0.01	2.39	0.378398	75.05	1.87535	0
1	89	52	0	1	0	0	0	19.62	1.2927	0.01	0.01	2.49	0.396199	46.93	1.67145	0					23	17	13	11.8	8.4	76.6	43.6			0.41	-0.387216	0.01	0.01	2.19	0.340444	84.96	1.92921	0					49	35	28	8.5	4.6	76.9	45.8
1	90	30	0	1				537	2.72997	0.01	0.01	2.02	0.305351	22.85	1.35889	0					14	13	9	4.7	2.6	75.5	43.7				#NUM!				#NUM!		#NUM!	0
1	91	36	1	0	0		1	6.84	0.835056	0.01	0.01	68.49	1.83563	132.81	2.12323	2.16732					21	21	21	14.9	10.2	68.4	47.2			0.11	-0.958607	23.01	0.01	52.54	1.72049	166.19	2.2206	0	2.08	4.83	86	0.71	87	83	111	12.9	8.4	67.9	45.5
1	92	40	0		0	0	0	510	2.70757	0.01	0.01	175.88	2.24522	106.26	2.02637	2.65128					15	9	8	7.6	4.7	71.9	45.3				#NUM!				#NUM!		#NUM!	0
1	93	35	0	1	0	1	0	49.99	1.69888	2.95	0.22	2.46	0.390935	211.63	2.32558	0															#NUM!				#NUM!		#NUM!	0
1	94	29	1	1	0	0	0	0.7	-0.154902	0.01	0.37	2.55	0.40654	126.66	2.10264	0					23	23	18	39.9	29.7	81.7	53.1			0.21	-0.677781	0.01	0.12	2.76	0.440909	87.29	1.94096	0	2.54	4.86	92	1.09	41	50	25	29.7	20.4	72	44.8
1	95	38	1	1	0	0	0	90.2	1.95521	0.01	0.01	2.01	0.303196	139.67	2.1451	0					22	18	17	4.2	2.4	73.9	46.4	110.6	233	36.53	1.56265	0.01	0.01	2.09	0.320146	173.15	2.23842	0	3.61	4.63	92	1.04	201	76	72	10.6	4.3	69.1	41.2
1	96	41	1	1	0	1	0	31.23	1.49457	0.01	0.01	178.18	2.25086	127.71	2.10622	0															#NUM!				#NUM!		#NUM!	0
1	97	48	1	1	0	0	0	270.35	2.43193	36.2	0.01	33	1.51851	212.41	2.32717	0					18	30	15	20.4	12.7	76.9	50.9			0.51	-0.29243	21.22	0.01	15.04	1.17725	221.27	2.34492	0	2.89	4.8	62	1.17	116	195	79	17	7.9	73.9	47
1	98	39	1	1	0	0	0	360	2.5563	0.01	0.02	4.67	0.669317	75.61	1.87858	0					18	15	16	109	7.1	78.3	49.9			0.01	-2	9.88	0.01	8.2	0.913814	163.71	2.21408	0	1.65	4.38	90	0.76	69	54	73	7.3	3.9	72.8	43.2
1	99	38	1	1	1	0	1	1680	3.22531	0.01	0.01	89.28	1.95075	55.32	1.74288	0					43	38	81	12.7	7.8	82.1	48.4	109.8	434	1.07	0.0293838	6.27	0.01	120.93	2.08253	62.27	1.79428	0	2.31	5.08	81	1	277	175	511	12.7	5.3	70.2	41.6
1	100	34	0	1	0	1	0	15882	4.20091	0.01	71.17	0.01	-2	167.6	2.22427	0					36	67	68	15.6	10	77.6	48.6				#NUM!				#NUM!		#NUM!	0
1	101	43	1	1	0	0	0	32.78	1.51561	2.02	0.01	137.57	2.13852	171.26	2.23366	0	4.26	5.78	215	1.88	24	19	18	8.3	5.2	82.7	47.4			7.91	0.898176	1.39	0.01	112.38	2.05069	159.46	2.20265	0	2.53	4.87	113	0.93	49	41	48	12.2	7.7	74	45.5
0	102	32	1	1	0	1	0	920	2.96379	0.01	41.67	2.89	0.460898	74.95	1.87477	2.53908														3.17	0.501059	0.01	0.57	3.74	0.572872	245.59	2.39021	0	2.28	5.23	142	0.84	135	82	242	41.3	2.7	70.6	42.1
1	103	50	1	1	0	0	0	38.91	1.59006	0.01	0.01	129.96	2.11381	157.96	2.19855	0					35	21	27	18.6	12.8	79.6	50.1	73.5	357	1.14	0.0569049	0.01	0.01	149.11	2.17351	140.81	2.14863	0	3.12	4.21	130	1.24	23	21	43	10.7	7	71.1	7
0	104	39	0	1	0	0	0	4470	3.65031	0.01	0.01	294.04	2.46841	191.18	2.28144	0					18	12	14	9.2	4.1	79.4	46.6				#NUM!				#NUM!		#NUM!	0
1	105	34	0	0	0	0	0	427	2.63043	0.01	0.01	30.34	1.48202	172.78	2.23749	3.12057					20	8	7	11.3	6.7	79.7	51.8				#NUM!				#NUM!		#NUM!	0
1	106	26	1	0	0	0	0	3082	3.48883	0.01	0.01	182.37	2.26095	174.94	2.24289	0					16	14	12	15.7	9.7	75	47.5			28.21	1.4504	0.01	0.01	247.19	2.39303	689.12	2.83829	0	5.06	4.73	145	1.45	120	158	77	9.2	4.4	79.2	48.6
1	107	26	1	0	0	0	0	6.55	0.816241	7.15	0.01	209.39	2.32096	113.39	2.05457	2.58771					20	14	18	14.3	9.9	72.7	47.5				#NUM!				#NUM!		#NUM!	0
1	108	26	1	0	0	1	0	3.28	0.515874	0.71	0.01	204.1	2.30984	100.66	2.00286	1.89432					23	38	41	10.2	6.4	76.5	45.8			0.51	-0.29243	3.47	0.01	204.99	2.31173	162.8	2.21165	0	2.82	5.52	179	1.27	45	61	88	14	8.1	77.5	48.5
0	109	37	1	1	0	0	1	40.39	1.60627	0.01	0.13	2.57	0.409933	93.48	1.97072	0					37	26	24	7.7	4.7	70.5	46.5			4.99	0.698101	0.01	0.11	1.63	0.212188	35.18	1.5463	0	2.99	4.66	111	0.97	39	53	65	15.6	8.8	72.9	49.1
1	110	36	1	1	0	0	0	106.3	2.02653	1.12	0.03	2.49	0.396199	104.73	2.02007	2.0086	4.02	4.76	90	1.1	38	52	27	14.9	9.2	77.6	51.7				#NUM!				#NUM!		#NUM!	0
1	111	54	1	1	0	0	0	101	2.00432	0.01	0.01	174.8	2.24254	141.37	2.15036	0					21	13	22	8.8	5.4	87.9	51.7			43.85	1.64197	0.01	0.01	122.09	2.08668	101	2.00432	0	3.89	3.84	125	2.2	43	18	39	8	3.5	80.8	46.6
1	112	34	0	1	0	0	0	830	2.91908	0.1	0.01	148.28	2.17108	248.26	2.39491	0					22	19	26	11.6	7.2	87.8	50.1			0.56	-0.251812	2.67	0.01	124.32	2.09454	277.43	2.44315	0	2.43	3.92	93	0.99	237	55	278	14.1	5.5	79.5	44.6
1	113	32	1	1	0	0	0	69.72	1.84336	4.74	0.01	65.74	1.81783	50.14	1.70018	0	4.84	4.81	214	1.11	24	20	24	4.1		82.8	46.2			6.57	0.817565	7.4	0.01	135.97	2.13344	102.44	2.01047	0	3.8	4.89	94	1.1	101	95	179	7.6	3.5	79.9	44.5
1	114	42	1	0	0	1	0	31.86	1.50325	0.01	0.01	40.69	1.60949	94.43	1.97511	2.35793	3.74	4.87	146	1.57	16	16	21	14.4	9.3	79.2	48			3.1	0.491362	0.01	0.01	29.07	1.46345	109.7	2.04021	1.8488	1.62	3.92	79	0.67	41	54	64	9.8	4.9	73.1	40.8
1	115	55	1	1	0	1	0	315	2.49831	0.01	0.01	1.77	0.247973	38.01	1.5799	0					21	21	24	5.6	2.8	71.4	43			23.65	1.37383	2.19	0.01	1.71	0.232996	9.95	0.997823	0	3.13	4.67	130	1.23	45	44	112	8.3	4.2	67.2	41.5
1	116	30	0	1	0	0	0	275	2.43933	0.01	0.01	210.69	2.32364	358.36	2.55432	0					16	10	16	12.8	8.4	82.3	52.4				#NUM!				#NUM!		#NUM!	0
0	117	28	1	1	0	0	0	275	2.43933	0.01	0.01	210.69	2.32364	358.36	2.55432	0					16	10	16	12.8	8.4	82.3	52.4				#NUM!				#NUM!		#NUM!	0
1	118	38	1	0	0	1	0	2.23	0.348305	0.01	0.01	6.17	0.790285	302.83	2.4812	0					24	32	24	14	9.6	75.6	47			1.87	0.271842	0.01	0.01	2.49	0.396199	115.3	2.06183	0	2.89	5.19	161	0.99	60	59	53	5.7	3.1	73	44
1	119	30	1	0	0	1	0	64.58	1.8101	0.01	0.01	113.96	2.05675	53.71	1.73006	1.92065					31	89	48	13.6	9.2	84.2	51.8			0.31	-0.508638	4.7	0.01	254.94	2.40644	167.76	2.22469	0	2.89	5.39	103	1.29	209	349	439	9.9	4	76.4	47.7
1	120	43	0	1	0	0	0	4.66	0.668386	0.01	0.01	277.88	2.44386	214.67	2.33177	0					15	10	10	10.3	6.4	81.8	47.8			0.52	-0.283997	3.02	0.01	134.52	2.12879	150.06	2.17626	0	2.55	3.73	142	0.86	61	59	39	6.6	3.8	80.2	42.9
1	121	48	1	1				40.31	1.60541	0.01	0.01	10.96	1.03981	179.39	2.2538	0														3.63	0.559907	0.01	0.01	5.19	0.715167	239.63	2.37954	0	2.88	3.92	74	1.21	30	36	27	7.8	4.5	72.6	44.8
1	122	33	1	0				130	2.11394	0.01	0.01	174.12	2.24085	224.9	2.35199	3.04922					25	12	25	19.9	13.8	74	46.3			0.22	-0.657577	0.51	0.01	83.78	1.92314	68.04	1.83276	0	7.17	4.51	183	0.98	28	18	55	16	9.7	76.9	45.7
1	123	36	1	1	0	1	1	696	2.84261	0.01	0.01	2.89	0.460898	146.35	2.16539	0					24	25	30	21.4	14.5	81.7	46.9			5.53	0.742725	0.01	0.01	2.66	0.424882	104.82	2.02044	0	3.2	5.68	78	1.02	42	49	52	19.8	11.3	78.6	45.9
1	124	45	0	1	0	0	0	400	2.60206	1.43	0.01	232.79	2.36696	124.61	2.09555	0					19	12	10	5.7	2.6	76	49.1			1.08	0.0334238	9.73	0.01	241.69	2.38326	146.13	2.16474	0	1.94	3.51	80	0.65	79	20	44	5.9	2.3	66.8	42.6
0	125	50	1	1	0	0	0	832	2.92012	0.01	0.01	2.86	0.456366	186.75	2.27126	0															#NUM!				#NUM!		#NUM!	0
1	126	29	0	1	0	0	0	435	2.63849	0.01	0.01	11.7	1.06819	63.32	1.80154	0					24	33	14	18.1	12.2	76.9	48.2			532	2.72591	0.01	0.01	161.05	2.20696	220.92	2.34424	0	2.53	4.19	116	0.75	25	25	12	7.5	4.2	74.5	41.7
1	127	39	1	1	0	0	0	1050	3.02119	2.61	0.01	57.48	1.75952	51.61	1.71273	0					18	21	14	12	8.2	78.7	50.3				#NUM!				#NUM!		#NUM!	0
1	128	46	1		0	1	0	40.7	1.60959	0.01	0.01	278.85	2.44537	247.54	2.39365	0															#NUM!				#NUM!		#NUM!	0
1	129	44	0	1	0	0	0	0.6	-0.221849	259.94	0.01	19.7	1.29447	372.65	2.5713	0					27	18	15	5.5	3.3	79.8	45.4			0.05	-1.30103	50.35	0.01	10.81	1.03383	184.29	2.2655	0	3.01	4.32	104	1.54	50	39	42	6	3.7	76.7	44.1
1	130	42	0	1	0	1	0	94	1.97313	0.01	3.43	2.49	0.396199	210.29	2.32282	0					16	11	11	16.6	11.3	74.5	42.1			3.1	0.491362	0.01	0.32	1.22	0.0863598	73.15	1.86421	0	2.49	3.44	170	0.87	52	43	23	15.7	9.9	74.6	43.6
1	131	33	1	1	0	0	0	7865	3.8957	0.01	10.5	1.79	0.252853	126.55	2.10226	0					18	17	29	13.3	8.8	83.3	48.8	99	420	3106	3.4922	0.01	8.6	1.73	0.238046	136.71	2.1358	0	2.97	5.18	97	1.25	93	149	93	12.8	7.7	82.5	47.1
1	132	32	1	1	0	1	0	1.69	0.227887	0.01	0.01	7.06	0.848805	95.22	1.97873	0					22	24	29	8.6	5.3	76.5	46.7	113.7	403.6	1.42	0.152288	0.01	0.01	10.83	1.03463	135.64	2.13239	0	5.82	5.41	90..0	0.97	64	75	113	11.4	6.2	74.8	46.9
1	133	55	1	1	0	1	0	1.4	0.146128	0.01	0.01	90.34	1.95588	404.72	2.60715	0	4.71	4.88	186	1.59	44	78	38	15.8	10.1	75.8	49.3			0.05	-1.30103	1.79	0.01	46.09	1.66361	138.13	2.14029	0	4.38	5.03	167	1.42	30	37	88	11.2	6.7	79.5	50.9
1	134	42	1	1	0	0	0	5.57	0.745855	0.01	1.39	2.18	0.338456	56.79	1.75427	0														1.41	0.149219	0.01	0.9	1.53	0.184691	3.98	0.599883	0	3.1	4.76	75	0.92	145	179	81	10.6	5.2	72.3	45.7
1	135	37	1	1	0	1	0	313	2.49554	0.01	0.01	237.46	2.37559	117.74	2.07092	0	4.85	5.4	184	1.18	27	22	31	10.6	7.3	79	48.7			5.7	0.755875	0.11	0.01	222.65	2.34762	230.29	2.36228	0	2.72	4.8	91	0.77	29	28	29	12.5	7.6	77.5	47.4
1	136	34	1	1	0	0	0	30.85	1.48926	0.01	0.01	2.96	0.471292	205.65	2.31313	0					23	11	21	7.3	4.5	73	47.4			0.53	-0.275724	0.38	0.01	2.24	0.350248	124.65	2.09569	0	2.31	4.57	115	0.85	75	42	79	9.2	5.9	72.8	44.8
1	137	43	1	1	0	0	0	2.97	0.472756	0.01	0.01	235.23	2.37149	216.08	2.33461	2.26717					23	18	32	11.1	7.7	82.1	45				#NUM!				#NUM!		#NUM!	0
1	138	45	1	1	0	0	0	502.7	2.70131	0.01	0.01	28.85	1.46015	117.46	2.06989	0														4.93	0.692847	0.01	0.01	33.65	1.52699	23.11	1.3638	0	3.2	4.32	91	1.11	43	43	48	9.7	4.9	74.2	45.5
1	139	30	1	0	0	1	0	48.09	1.68205	5.79	0.11	1.56	0.193125	73.26	1.86487	2.60097														10.55iu	#VALUE!	2.13	1.30sc	1.39sc	#VALUE!	8.81sc	#VALUE!	0	2.89	4.69	153	1.41	45	35	94	16.2	10.1	85.6	48.8
1	140	32	1	0	0	1	0	379	2.57864	0.01	0.01	249.97	2.39789	196.83	2.29409	2.33846					12	14	49	7	3.7	74.3	47.6			0.69	-0.161151	0.01	0.01	239.72	2.3797	202.83	2.30713	0	2.36	4.91	141	1.2	233	176	437	8.9	4	69.8	43.3
1	141	35	1	1	0	1	1	1131	3.05346	0.01	0.01	2.32	0.365488	144.39	2.15954	0					25	35	22	28.2	20	83.4	51.5	96.3	473.3	585	2.76716	0.01	0.01	3.01	0.478566	35.29	1.54765	0
1	142	47	1	1	0	0	0	99.76	1.99896	0.01	0.01	73.96	1.869	187.6	2.27323	0														0.73	-0.136677	0.01	0.01	81.19	1.9095	65.64	1.81717	0	3.88	5.23	140	1.91	32	38	50	6.2	3.7	75.7	46
1	143	48	1	1	0	0	0	1.36	0.133539	1.58	0.01	390.53	2.59165	22.52	1.35257	0					21	25	13	17.5	11	74.3	49.3	98.5	357		#NUM!				#NUM!		#NUM!	0
1	144	32	0	1	0	0	0	7.78	0.89098	0.01	0.01	4.84	0.684845	232.24	2.36594	0					21	13	12	21	14.5	75.4	50.6				#NUM!				#NUM!		#NUM!	0
1	145	39	1	1	0	1	0	1.14	0.0569049	0.01	0.01	214.78	2.33199	48.15	1.6826	0					20	22	22	18.9	12.1	78	47.5			0.31	-0.508638	1.35	0.01	295.12	2.47	31.06	1.4922	0	3.37	4.81	79	1.27	128	151	149	12.1	6.2	69.3	41.1
1	146	33	1	0	0	1	0	1.31	0.117271	1.4	0.01	169.6	2.22943	94.46	1.97525	2.43775					21	44	107	12.5	8.2	83.9	49.3			0.62	-0.207608	4.86	0.01	227.15	2.35631	181.42	2.25869	0	5.12	5.01	189	1.41	29	27	70	8.4	5.1	78.3	47.8
1	147	59	1	1	0	0	0	4.9	0.690196	167.81	0.01	2.07	0.31597	88.62	1.94753	0					25	18	30	16	10.2	75.2	46.3			1.66	0.220108	234.83	0.02	2.31	0.363612	228.37	2.35864	0	6.24	5.18	117	1.32	34	28	25	17.6	13.3	76.5	47.4
0	148	40	1	1	0	0	0	2966	3.47217	3.16	0.6	2.07	0.31597	168.81	2.2274	2.08991					32	41	36	8	5	74.7	43			1262	3.10106	3.95	0.4	2.11	0.324282	27.8	1.44404	0					23	28	24	13.1	8.5	79.3	49.5
1	149	22	1	1	0	0	0	322	2.50786	0.82	0.37	1.95	0.290035	125.44	2.09844	0					19	22	16	72.3	47.3	72.3	47.3				#NUM!				#NUM!		#NUM!	0
1	150	33	1	1	0	1	0	290	2.4624	0.01	0.01	56.06	1.74865	42.4	1.62737	0	5.48	5.08	203	1.57	25	27	19	6	3.7	76.9	46.3	118.6	296		#NUM!				#NUM!		#NUM!	0
1	151	26	1	0	0	0	0	730	2.86332	0.01	0.01	265.98	2.42485	85.32	1.93105	3.11059					15	28	24	7.6	4.4	82.6	47.4	97.3	496	41.04	1.61321	1.12	0.01	174.43	2.24162	50.75	1.70544	2.75051	2.4	5.18	120	1.17	67	165	116	9.6	4.7	76.8	44.5
1	152	28	1	0	0	0	0	478.57	2.67995	0.01	0.01	109.88	2.04092	69.33	1.84092	3.52504															#NUM!				#NUM!		#NUM!	0
1	153	31	0	0	0	0	0	15.71	1.19618	0.01	0.01	69.13	1.83967	49.88	1.69793	0	3.51	4.32	250	1.12	22	10	10	7.2	4.4	78.4	44.2				#NUM!				#NUM!		#NUM!	0
1	154	32	1	1	0	0	0	362	2.55871	0.01	0.01	203.1	2.30771	186.33	2.27028	0	5.47	5.41	240	1.97	33	55	55	11.9	8	72.3	46.6	112.9	411.5	35.39	1.54888	0.62	0.01	110.61	2.04379	42.77	1.63114	0	4.54	5.18	226	1.63	78	139	77	13.3	8.4	74.4	47.8
1	155	62	1	1	0	0	0	580	2.76343	0.01	0.01	15.67	1.19507	184.92	2.26698	0														465	2.66745	0.01	0.01	10.14	1.00604	279.15	2.44584	0	2.77	4.46	98	0.61	30	21	19	11	6.3	69.4	46.8
1	156	48	1	0	0	1	0	1.04	0.0170333	0.62	0.01	3.35	0.525045	203.6	2.30878	0	5.33	5.23	187	2.83										0.41	-0.387216	3.55	0.01	2.12	0.326336	38.86	1.5895	0	3.55	4.74	124	1.63	37	31	48	10.1	5.6	77	46.6
1	157	33	1	0	0	0	0	437	2.64048	0.01	0.01	183.37	2.26333	36.371	1.56076	3.62634					29	41	18	11	6.9	77.9	51.9	99	363	108	2.03342	0.01	0.01	131.73	2.11968	135.64	2.13239	0	3.33	5.12	123	1.26	70	91	38	10.7	6.2	77.3	40.4
1	158	30	0	0				400	2.60206	0.01	0.01	83.5	1.92169	58.48	1.76701	3.2833	4.95	4.41	196	1.47	22	10	15	17.8	11.5	79.6	48.2	119.8	241		#NUM!				#NUM!		#NUM!	0
1	159	34	1	0				506	2.70415	1.98	0.01	36.11	1.55763	92.71	1.96713	3	7.25	5.11	149	2.23	21	13	17	17.1	11.4	84.2	44			9.29	0.968016	4.93	0.01	91.73	1.96251	115.62	2.06303	0	3.95	5.42	109	1.98	66	47	27	16.3	10.8	83.3	45.3
1	160	47	1	1	0	1	0	389	2.58995	4.73	0.01	174.72	2.24234	199.26	2.29942	2.29447	8.33	4.74	217	1.26	22	24	26	7.2	3.4	75.7	46.3	92.2	354.1	26.66	1.42586	2.76	0.01	254.48	2.40565	148.8	2.1726	0	10.25	4.89	246	1.11	19	20	26	7.1	4	80.3	48.8
1	161	53	1	1	0	0	0	1.25	0.09691	0.01	0.01	2.74	0.437751	95.53	1.98014	0	5.65	4.96	161	1.69										0.63	-0.200659	0.01	0.01	2.49	0.396199	58.46	1.76686	0	2.5	4.54	54	0.82	26	12	32	8.4	5.2	72.6	44.5
1	162	39	1	0	0	0	0	15.12	1.17955	0.01	0.01	83.06	1.91939	45.29	1.656	3.3784	6.76	4.99	233	1.45	26	20	27	8.6	6	82.2	51.4	87.6	489.6	1.24	0.0934217	0.01	0.01	65.49	1.81617	53.74	1.7303	0	3.58	4.25	117	1.09	42	35	49	8.7	4.2	77.8	49.3
1	163	36	1	1	0	1	0	1.47	0.167317	0.01	0.01	3.57	0.552668	224.06	2.35036	0					25	59	65	14.3	8.2	81.8	48.3			0.01	-2	310.44	0.01	2.13	0.32838	143.99	2.15833	0	3.06	4.78	90	1.64	62	103	300	12.9	5.9	78.1	45.6
1	164	38	1		0	1	0	1.03	0.0128372	0.01	0.01	9.17	0.962369	408.21	2.61088	0					45	21	21	14.3	9.2	78.6	46.3			0.14	-0.853872	0.01	0.01	3.75	0.574031	178.7	2.25212	0	2.01	4.47	37	0.87	48	50	77	12.1	5.3	64.1	40.4
1	165	36	0	1	0		0	21.75	1.33746	0.01	0.01	2.42	0.383815	210.54	2.32333	0	8.69	4.48	184	2.18	52	82	13	17.3	11.7	87.4	47.3				#NUM!				#NUM!		#NUM!	0
1	166	42	0	0	0	0	0	80.22	1.90428	0.01	0.01	184.87	2.26687	84.37	1.92619	1.89376														1.4	0.146128	0.01	0.01	372.39	2.571	302.76	2.4811	0	3.54	4.32	63	0.74	38	45	31	6.9	3.7	77.9	43.6
1	167	33	0	0				1.8	0.255273	1.99	0.01	185.77	2.26898	146.42	2.1656	2.12385	5.97	4.26	215	1.96											#NUM!				#NUM!		#NUM!	0
1	168	52	0		0	0	0	8	0.90309	0.71			#NUM!		#NUM!	0	6.7	4.73	234	2.34	15	13	17	8.8	5.4	77.8	46.2	101	299	1.33	0.123852	7.38	0.01	102.06	2.00886	591.29	2.7718	0	5.75	·4.38	99	1.29	53	53	59	11.6	6.1	73.2	42
1	169	50	1	1	0	0	0	86.02	1.9346	0.01	0.01	165	2.21748	147.84	2.16979	4.43457														9.87	0.994317	0.5	0.01	94.2	1.97405	163.28	2.21293	0
1	170	41	1	0	0	0	1	0.59	-0.229148	0.01	0.01	46	1.66276	237.57	2.37579	0															#NUM!				#NUM!		#NUM!	0
1	171	27	0	0				749	2.87448	0.01	0.01	72.44	1.85998	177.78	2.24988	3.95999	4.78	4.55	264	2.36	30	37	49	9.3	5.6	79	46.8				#NUM!				#NUM!		#NUM!	0
1	172	31	1	0	0	0	0	1.99	0.298853	0.01	0.01	9.43	0.974512	73.96	1.869	0					25	31	28	21	13.2	77.3	54				#NUM!				#NUM!		#NUM!	0
1	173	41	1	1	0	0	0	591	2.77159	0.01	0.01	2.98	0.474216	152.25	2.18256	0					20	23	20	7.8	4.5	81.8	48.8	107.3	384		#NUM!				#NUM!		#NUM!	0
1	174	53	0	0				1.27	0.103804	7.29	0.01	291.59	2.46477	163.86	2.21447	0	4.29	4.93	203	1.73	27	20	15	7.6	4.7	83.2	47	104.4	247		#NUM!				#NUM!		#NUM!	0
1	175	43	0					23.28	1.36698	0.01	0.01	215.56	2.33357	155.89	2.19282	0	4.01	4.56	288	1.43	63	145	29	7.4	4	78.8	47.1			1.29	0.11059	0.01	0.01	215.84	2.33413	176.74	2.24733	0	2.02	3.65	88	0.59	69	77	53	6.3	2.7	66.5	42.8
1	176	43	1	1				7	0.845098	0.01	0.01	20.98	1.32181	115.22	2.06153	1.93551					25	25	25	12.1	8.2	81.7	47.9	77.2	388.8	0.11	-0.958607	5.05	0.01	27.71	1.44264	256.19	2.40856	0	2.86	4.94	122	1.2	59	108	65	12.2	7.2	74.1	45.5
1	177	31	1		0	1	0	239	2.3784	0.01	0.01	93.65	1.97151	212.83	2.32803	0					24	29	32	10.6	7.6	85.4	51	102.1	351	8.12	0.909556	2.1	0.01	82.18	1.91477	103.47	2.01481	1.84696		.			68	103	101	7.3	4.3	81.5	45.6
1	177	51	1	1	0	1	0	1776	3.24944	0.01	0.01	82.99	1.91903	122.73	2.08895	3.38202	4.03	4.2	153	1.87	17	10	13	3.6	1.7	76.1	46.8			2485	3.39533	0.01	0.01	67.53	1.8295	125.69	2.0993	2.33846	3.6	3.71	151	1.09	38	53	33	8.3	4.3	74	45.9
0	178	48	0	0	0	0	0	0.76	-0.119186	0.01	0.01	3.22	0.507856	147.85	2.16982	0					17	18	18	14.8	10.9	76.7	44.8			0.11	-0.958607	2.19	0.01	3.94	0.595496	239.42	2.37916	0
1	179	46	1	1	0	0	0	1551	3.19061	0.01	0.72	1.7	0.230449	79.38	1.89971	0					19	13	17	12.1	7.8	82.7	48.1	102.9	272.5	1124	3.05077	0.01	0.24	1.42	0.152288	49.48	1.69443	0	4.37	4.69	148	1	88	116	101	11	5.4	78.1	46.1
1	180	38	1	1	0	0	1	377	2.57634	0.01	0.01	233.15	2.36764	59.22	1.77247	0														155	2.19033	0.01	0.01	187.91	2.27395	301.22	2.47888	0	2.31	4.51	114	0.6	35	48	32	14.9	8.9	73	45.1
1	181	30	1	0				1648	3.21696	0.01	0.01	264.51	2.42244	203.67	2.30893	3.8704					17	17	14	14.5	9.2	75.2	49.5	88.8	378.9		#NUM!				#NUM!		#NUM!	0
1	182	52	1	0	0	1	0	0.6	-0.221849	8.24	0.01	280.55	2.44801	170.02	2.2305	2.51587					18	19	20	17.4	7.1	70.5	46.6	84.9	444	0.36	-0.443697	3.87	0.01	141.15	2.14968	70.81	1.85009	0	6.6	4.47	160	1.66	18	14	11	24.3	15.4	69.5	46.7
1	183	43	0	1	0	0	0	692	2.84011	0.01	0.01	209.59	2.32137	265.75	2.42447	3.36549					26	14	21	5.3	2.8	67.5	38.3	120.8	244.8	0.14	-0.853872	9.11	0.01	81.48	1.91105	122.9	2.08955	0	3.23	3.71	68	0.89	83	51	101	12.5	6.6	71.2	44.7
1	184	30	0	1	0	1	0	1235	3.09167	0.01	0.01	3.29	0.517196	140.88	2.14885	0														441	2.64444	0.01	0.01	2.17	0.33646	95.49	1.97996	0	3.91	4.23	164	1.07	116	158	135	8.5	4.3	79.6	47.8
1	185	30	1	1	0	0	0	70.72	1.84954	0.01	0.01	165.51	2.21882	99.17	1.99638	0					21	11	12	28.7	14.8	74.4	49.5			1.49	0.173186	0.01	0.01	148.01	2.17029	91.52	1.96152	0	3.16	4.29	92	1	44	34	23	21.3	9.9	73.2	44.1
1	186	37	1	0	0	1	0	54.87	1.73933	0.01	0.01	125.43	2.0984	62.9	1.79865	4.25042	7.75	5.63	166	1.54	22	34	31	12.9	8.6	76	46.1	91.2	374.8		#NUM!				#NUM!		#NUM!	0
1	187	39	0	0				1.59	0.201397	0.01	0.01	120.88	2.08235	114.25	2.05786	0					15	10	11	6.6	3	69.9	45.2	110	241	0.22	-0.657577	7.99	0.01	247.02	2.39273	173.95	2.24042	0	3.3	4.14	107	0.8	125	182	115	9.8	4.6	74.5	46.5
1	188	45	1	0	0	1	0	3.49	0.542825	0.19	0.01	159.62	2.20309	73.86	1.86841	2.75128					27	44	144	20.5	13	73.7	47.1	97.7	304.1	0.12	-0.920819	1.57	0.01	177.51	2.24922	107.31	2.03064	0	4.04	4.64	141	1.37	49	119	155	13.3	7.7	70.4	42.1
1	189	41	0	0				70.8	1.85003	0.01	0.01	47.65	1.67806	141.16	2.14971	0															#NUM!				#NUM!		#NUM!	0
1	190	37	0	1	0	0	0	254	2.40483	0.01	0.01	94.24	1.97424	112.16	2.04984	0	3.73	4.5	150	1.09	19	20	15	8.4	3.9	73	46.6	119.9	114	184	2.26482	0.01	0.01	67.61	1.83001	196.03	2.29232	0	1.56	3.59	103	0.67	45	37	24	9.5	4.3	66	40.4
1	191	45	0	0				31.13	1.49318	0.41	0.01	134.55	2.12888	227.92	2.35778	0														8.13	0.910091	0.01	0.01	80.75	1.90714	253.22	2.4035	0	2.21	3.64	98	0.95	39	49	24	9.3	4.6	73.1	44.6
1	192	32	1	0	0	0	0	453	2.6561	0.01	0.01	44.83	1.65157	89.12	1.94998	0														1.09	0.0374265	0.01	0.01	24.68	1.39235	167.87	2.22497	0	2.9	4.05	76	1.5	87	150	150	11.2	5.9	72.4	47.4
1	193	32	1		0	0	0	2126	3.32756	0.01	0.01	103.45	2.01473	99.87	1.99944	3.55751					37	77	26	14.3	8.9	75.8	48.1	95.7	463.8	1.65	0.217484	0.01	0.01	175.07	2.24321	123.28	2.09089	0	2.53	5.56	101	1.05	183	445	181	12.8	7.4	75	45.7
1	194	25	0	0				55	1.74036	3.12			#NUM!		#NUM!	2.6149														0.01iu	#VALUE!	2.53	0.33sc	0.03sc	#VALUE!	8.94sc	#VALUE!	0	2.05	4.37	126	0.88
1	195	30	1	0	0		0	124.7	2.09587	0.01	0.01	177.48	2.24915	142.05	2.15244	0					28	33	15	16.7	9.7	82.5	50.3			49.01	1.69028	0.01	0.01	345.66	2.53865	184.68	2.26642	0	3.55	5.17	124	1.15	62	87	30	16	9.6	79.1	46.6
1	196	36	1	0	0	1	0	7.81	0.892651	0.01	0.01	4.6	0.662758	116.76	2.06729	0	6.83	5.24	189	2.06	42	83	41	11	6.4	71.9	46.1				#NUM!				#NUM!		#NUM!	0
1	197	32	1	0				96.35	1.98385	3.12	0.01	131.87	2.12015	124.95	2.09674	3.28556	3.91	5.23	183	1.28	23	20	19	19	12.8	75.3	48.7	85.4	305.2	1.35	0.130334	6.04	0.01	108.22	2.03431	164.03	2.21492	0	1.93	5.2	91	0.72	71	94	58	9.6	5.2	75.5	47.6
1	198	52	1	0				288	2.45939	0.01	0.01	41.54	1.61847	77.16	1.88739	0	2.2	4.95	49	1.15	28	33	20	8.7	4.6	74.1	41.2	98.7	229	0.34	-0.468521	2.9	0.01	20.14	1.30406	122.48	2.08807	0	2.44	4.58	38	0.75	27	35	34	8.7	6.2	74.8	43.4
1	199	33	0	0	0	0	0	5653	3.75228	0.01	0.01	112.05	2.04941	79.97	1.90293	1.83822	2.86	4.76	130	1.16	19	25	25	12.5	7.7	77.4	44.1			221.27	2.34492	0.01	0.01	82.55	1.91672	107.75	2.03242	0	3.97	3.83	124	1.26	39	47	40	6.6	3.3	70	38
1	200	39	0	0				47.84	1.67979	0.01	0.01	82.16	1.91466	77.68	1.89031	3.48144					20	14	15	7.3	4.5	82.5	46.5	92.7	205.8	0.44	-0.356547	32.65	0.01	173.39	2.23902	140.16	2.14662	0	2.19	3.97	131	0.7	101	91	42	8.5	5.1	76.6	41
1	201	33	1	0				12.89	1.11025	0.01	0.01	253.08	2.40326	206.32	2.31454	0					32	27	20	12.6	7.7	77.1	49.8				#NUM!				#NUM!		#NUM!	0
1	202	27	0	1	0	0	0	10.88	1.03663	0.01	0.01	7.37	0.867467	255.83	2.40795	0														2.21	0.344392	2.52	0.01	4.02	0.604226	119.23	2.07639	0	2.82	4.85	150	0.87	72	86	29	7.2	4.3	75.6	44.3
0	203	40	1	0	0	0	0	40.62	1.60874	0.01	0.01	12.55	1.09864	137.15	2.1372	3.50106					18	22	20	6.8	4.1	77.2	47.2	94.2	386.5		#NUM!				#NUM!		#NUM!	0
1	204							1411	3.14953	0.01	0.04	2.45	0.389166	246.12	2.39115	0					18	19	27	13.8	9.3	74.9	48.7	102	288.7		#NUM!				#NUM!		#NUM!	0
0	205	47	1	1	0	0	0	136	2.13354	0.01	0.01	3.21	0.506505	171.25	2.23363	0					28	57	23	7	4.4	74.9	47.5	86.2	512	1.1	0.0413927	0.01	0.01	1.74	0.240549	21.95	1.34143	0	2.86	4.48	118	1.08	35	31	50	8.8	5.4	73	45.3
1	206	40	1	0				1.11	0.045323	2.55	0.01	6.67	0.824126	176.07	2.24569	0	4.23	5.03	186	1.57										1.39	0.143015	1.45	0.01	6.84	0.835056	159.32	2.20227	0	4.06	4.82	207	1.82	102	137	229
1	207	54	0	1	0	0	0	383.82	2.58413	0.01	0.01	64.3	1.80821	163.76	2.21421	0															#NUM!				#NUM!		#NUM!	0
1	208	48	1	1	0	0	0	12.59	1.10003	2.56	0.01	116.63	2.06681	88.92	1.949	0														1.36	0.133539	9.27	0.01	175.75	2.2449	148.7	2.17231	0	2.87	4.31	162	0.63	32	13	47	8.4	4.6	72.1	42.4
1	209	33	0	0	0	0	0	16500	4.21748	0.01	0.01	139.48	2.14451	153.71	2.1867	3.88986															#NUM!				#NUM!		#NUM!	0
1	210	34	1	0				41.52	1.61826	0.01	0.01	5.02	0.700704	22.62	1.35449	3.08636	8.58	5.06	225	2.12	27	27	23	14.5	9.4	80.1	47.4	113.8	410.7		#NUM!				#NUM!		#NUM!	0
1	211	45	1	0	0	0	0	8.74	0.941511	0.01	0.01	63.94	1.80577	54.58	1.73703	0					19	22	18	8.6	3.6	76.7	48.2	103.1	285	1.28	0.10721	1.33	0.01	85.65	1.93273	133.73	2.12623	0	2.99	4.32	161	0.87	20	24	49	9.4	5.6	76.9	45.5
1	212	44	1	0	0	0	0	64.03	1.80638	0.01	0.01	108.77	2.03651	183.83	2.26442	3.42488														2.22	0.346353	1.18	0.01	169.85	2.23007	262.47	2.41908	0	1.87	5.11	108	1.11	93	80	65	12.5	7.3	70.9	44.4
1	213	33	0		0	0	0	1.06	0.0253059	6.14	0.01	52.27	1.71825	193.79	2.28733	0	6.42	4.4	242	2.24	21	11	21	11.9	7.2	74.6	44.9	125	225		#NUM!				#NUM!		#NUM!	0
1	214	40	1	0				9.5	0.977724	0.16	0.01	96.68	1.98534	61.89	1.79162	2.05308	9.77	5.02	250	2.11	32	61	52	14.1	8.9	76.2	49	101.1	453.7	1.77	0.247973	0.01	0.01	67.45	1.82898	68.17	1.83359	0	4.93	5.04	164	1.58	82	148	140	10.3	4.8	79.2	49.3
1	215	39	1	0	0	1	0	0.58iu	#VALUE!	0.01			#NUM!		#NUM!	2.54777					30	52	89	8.6	5.6	83.3	47.9			0.02	-1.69897	0.01	0.01	59.75	1.77634	44.81	1.65137	1.82866
1	215	39	1	0	0	1	0	1.06	0.0253059	0.01	0.26	0.02	-1.69897	9.28	0.967548	0	4														#NUM!				#NUM!		#NUM!	0	0.02	0.01	0.01	1.61	41	41	73	10.6	6.6	77.3	45.9
1	216	47	0	0	0	0	0	424	2.62737	0.01	0.01	67.96	1.83225	39.35	1.59494	4.06446					23	13	13	11.7	7.3	73.3	40.9	101.3	255		#NUM!				#NUM!		#NUM!	0
1	217	35	1	0				322	2.50786	5.97	0.01	422.98	2.62632	216.31	2.33508	5.13672					26	40	46	10.8	6.8	80	46.5	96.3	488.4	1.12	0.049218	7.47	0.01	117.12	2.06863	74.83	1.87408	0	3.41	4.86	103	1.31	47	52	52	11.4	7.1	74	46.3
1	218	30	1	0				8.14	0.910624	0.19	0.01	38.05	1.58035	117.38	2.06959	0	3.04	5.56	153	1.28	89	147	61	9.4	5.8	75.5	48.2	127.4	294		#NUM!				#NUM!		#NUM!	0
1	219	47	1	1	0	1	0	63.98	1.80604	0.01	0.01	2.43	0.385606	108.44	2.03519	0	4.44	4.68	139	1.34	47	49	68	12.5	7.8	69.8	43.4	113	488	1.01	0.00432137	0.01	0.01	2.4	0.380211	79.34	1.89949	0	4.34	4.62	144	1.62	16	22	35	11.6	5.9	77	45.1
1	220	47	1	0	0	0	0	128.58	2.10917	0.01	0.01	142.68	2.15436	151.62	2.18076	0					19	32	22	38.6	27.1	75.7	47.3	99.2	437.2		#NUM!				#NUM!		#NUM!	0
1	221	43	0	0	0	0	0	134.81	2.12972	0.01	0.01	166.61	2.2217	247.32	2.39326	3.42975					16	13	23	9	5.4	79.9	50.8			0.22	-0.657577	1.27	0.01	59.94	1.77772	235.29	2.3716	2.66181	2.08	4.23	60	0.84	191	237	400	10	4.1	71.9	45.5
1	222	45	1					72.98	1.8632	0.01	0.01	128.2	2.10789	138.79	2.14236	3.55991					25	31	26	7.5	4.6	74.8	45.4	80.5	286	17.94	1.25382	0.01	0.01	141.01	2.14925	116.41	2.06599	0	1.99	4.23	74	0.9	55	26	89	8.5	3.4	65.9	37.9
0	223	31	1	0				488	2.68842	0.34	0.01	147.43	2.16859	225.15	2.35247	2.49415	7.54	5.36	195	2.93	18	27	42	11.5	7.4	75.2	50				#NUM!				#NUM!		#NUM!	0
0	224	39	1		0	1	0	73.81	1.86812	0.01	0.01	108.08	2.03375	86.69	1.93797	2.11394					21	24	29	9.4	5.9	79.6	49.5			0.42	-0.376751	0.01	0.01	226.67	2.35539	233.51	2.36831	0	3.22	4.77	161	1.41	90	149	111	8.3	4	76.9	42.9
0	225	29	1	1	0	0	0	1147	3.05956	0.01	0.01	168.19	2.2258	174.89	2.24276	0	4.43	5.06	131	35.7	25	38	32	18.5	11.2	75.9	49.2			77.17	1.88745	0.01	0.01	179.11	2.25312	174.5	2.2418	0	2.57	4.98	89	0.97	34	55	72	12.8	7	73.2	49.1
0	226	53	1	0	0	1	0	66.66	1.82387	0.01	0.01	253.02	2.40315	161.29	2.20761	0	7.55	4.8	204	3.07	108	167	96	13.4	8	79.6	46.1	58.5	446	43.62	1.63969	0.01	0.01	132.05	2.12074	112.09	2.04957	0	3.32	4.42	96	1.32	248	341	199	9.3	4.2	72.9	42
0	227	34	1	0	0	1	0	507.11	2.7051	0.01	0.01	58.27	1.76545	37.87	1.5783	2.60314	4.1	5.28	180	1.83	28	33	46	6.1	3.3	76.5	50.4			212	2.32634	0.58	0.01	36.65	1.56407	111.46	2.04712	0	3.65	4.93	136	1.07	34	51	64	8.8	4.6	75.3	49.4
0	228	37	0	0				729	2.86273	0.01	0.01	222.2	2.34674	169.82	2.22999	4.62839					40	22	11	6.9	4.1	72.8	44.9			172	2.23553	0.01	0.01	138.09	2.14016	159.72	2.20336	0	3.93	3.64	170	1.57	42	59	21	9	4.6	75.9	43.4
0	229	33	1	0	0	0	1	813	2.91009	0.01	0.01	2.86	0.456366	98.33	1.99269	0														172	2.23553	0.01	0.01	1.77	0.247973	44.37	1.64709	0	2.27	5.39	58	0.76	82	92	51	14.1	8	74.1	46.9
0	230	45	1	1	1		1	3655	3.56289	0.01	0.01	264.51	2.42244	186.44	2.27054	0	5.66	6.11	228	1.47	19	19	19	15.1	9.6	75.8	49.3	94.2	480.5	26.19	1.41814	0.01	0.01	164.14	2.21521	184.83	2.26677	0	3.17	5.92	110	1.06	33	61	134	13.5	7.7	73.2	48.8
0	231	29	1	0	0	1	0	2665	3.4257	0.1	0.01	2.66	0.424882	120.77	2.08196	2.71181					26	40	38	13.9	9.4	78.9	52	97.8	489.4	1874	3.27277	0.74	0.01	1.9	0.278754	200.15	2.30136	2.44091	2.7	5.43	118	1.23	91	147	158	14.4	7.9	73.9	48.5
0	232	33	1	0				60.82	1.78405	0.01	0.01	115.85	2.0639	144.5	2.15987	3.54407	4.7	5.27	215	2.29	20	19	16	11.1	7.1	78.9	47.5	113.2	351.7	23.68	1.37438	0.01	0.01	190.75	2.28046	200.94	2.30307	0	3.54	5.18	98	1.41	77	119	132	7.5	4	77	46
0	233	38	1	1				2657	3.42439	0.01	0.01	116.09	2.06479	139.08	2.14326	0	3.56	4.83	192	2.1	35	45	32	6.8	4	74.2	43.7			1464	3.16554	0.01	0.01	123.52	2.09174	191.6	2.2824	0	4.01	4.61	141	2.61	116	191	114	10.6	6	79.2	45.8
0	234	47	1	1	0	0	0	3826	3.58274	0.01	0.04	2.14	0.330414	92.02	1.96388	0					23	22	19	13.9	8.7	79.1	49.1			2753	3.43981	0.01	0.06	3.83	0.583199	219.59	2.34161	2.10721	3.1	4.95	163	0.88	51	0.54	26	10.2	5.4	76.9	45.7
0	235	40	1	0	0	0	0	22.91	1.36003	0.01	0.01	161.75	2.20884	125.65	2.09916	3.03342	4.68	4.11	210	1.74	20	16	16	5.8	2.7	77.3	48.4	110.3	423.9		#NUM!				#NUM!		#NUM!	0
0	236	29	1	0	0	0	0	8863	3.94758	0.01	0.01	73.82	1.86817	43.13	1.63478	4.14613	6.67	5.97	213	1.84	25	31	19	10.4	6.8	80.5	49.8	115.6	304	6836	3.8348	0.01	0.01	196.66	2.29372	123.78	2.09265	2.20952	7.77	5.26	223	2.08	25	34	21	9.6	5.5	72.5	46.7
0	237	44	1	1	1	1	1	829	2.91855	1.71	0.01	2.01	0.303196	38.96	1.59062	0														334	2.52375	0.01	0.01	124.81	2.09625	94.63	1.97603	0	4.23	4.49	140	1.12	40	38	53	7	4	76.1	45.7
0	238	35	1	1	0	1	0	346	2.53908	4.82	0.01	141.95	2.15214	186.07	2.26968	0	3.23	5.6	108	1.66	61	65	75	11.6	7.4	81.9	51.1	110.6	420.5		#NUM!				#NUM!		#NUM!	0
0	239	33	0	1	0	0	0	16500	4.21748	0.01	81.58	0.16	-0.79588	29.59	1.47114	0					22	13	13	13.1	8	78.9	46.4			16500	4.21748	0.01	60.39	1.29	0.11059	475.75	2.67738	0	2.51	3.99	168	1.11	83	33	48	12.2	6.5	70.1	42.8
0	240	44	1	0	0	1	1	1481	3.17056	5.34	0.01	151.41	2.18015	144.5	2.15987	2.76864					17	20	22	14.6	9.7	77.9	47.3	84.6	447	1170	3.06819	1.37	0.01	157.74	2.19794	150.18	2.17661	0	4.3	4.31	164	1.27	42	29	59	10.8	6.7	70.1	43.6
0	241	48	0	1	0	0	0	1039	3.01662	0.01	0.01	167.18	2.22318	114.13	2.0574	0	3.2	4.43	101	0.7	15	11	13	21.1	13.4	76.5	48			388	2.58883	0.01	0.01	173.34	2.2389	85.79	1.93344	0	2.74	4.14	77	0.39	33	31	25	11.9	6.1	75.2	45.5
0	242	34	1	1	0	1	0	2036	3.30878	0.01	0.01	267.44	2.42723	204.55	2.3108	0					28	17	25	13.4	8.8	79.5	49.9			3607	3.55715	0.01	0.01	92.91	1.96806	144.15	2.15881	0	2.52	4.84	110	0.95	33	42	46	9.8	6.1	74.1	47.2
0	243	29	1	1				555	2.74429	5.74	0.13	6.88	0.837588	308.84	2.48973	1.93247														799	2.90255	6.58	0.01	6.06	0.782473	133.09	2.12415	2.28556
0	244	40	1	0	0	0	0	1076	3.03181	0.01	0.01	232.43	2.36629	59.63	1.77546	0	5.5	4.66	206	1.55	22	32	66	28.9	18.4	83.4	48.8	91.1	459	1288	3.10992	0.01	0.01	153.94	2.18735	58.49	1.76708	0	2.95	4.82	148	0.93	33	52	99	14.3	9.2	78.1	45.2
0	245	52	1	1	0	0	0	1393	3.14395	2.52	0.01	35.18	1.5463	58.09	1.7641	0					22	14	14	11	6.6	75.5	47.6	104.3	199	494	2.69373	0.01	0.01	18.01	1.25551	96.44	1.98426	0	3.62	4.71	109	0.71	81	81	39	8.6	3.5	70.7	41.3
0	246	33	0	0				157	2.1959	0.94	0.75	1.95	0.290035	166.55	2.22154	4.04139	7.91	4.72	233	2.85	14	12	14	8.2	5.2	73.8	47.3	116.7	262.5	22.1	1.34439	5.3	0.95	2.25	0.352183	106.38	2.02686	0	5.4	3.97	156	1.98	31	26	52	9.8	6.1	72.8	45.4
0	247	30	0	0	0	0	0	470	2.6721	0.01	0.01	17.06	1.23198	55.15	1.74155	0					26	20	12	15	9.8	75.7	46.8			996	2.99826	0.01	0.01	30.7	1.48714	158.77	2.20077	0	2.6	4.69	111	1.04	53	34	22	13.6	7.7	75.8	44
0	248	37	1	0	0	0	0	37.22	1.57078	0.01	6.51	2.1	0.322219	114.33	2.05816	4.96095					17	23	19	12.1	4.7	74.6	45.9	109.6	307	30.36	1.4823	0.58	1.54	2.08	0.318063	201.22	2.30367	0	3	4.59	105	1.13	34	33	71	11.7	7.1	71.5	44.1
0	249	39	1	0				16500	4.21748	0.01	77.83	0.66	-0.180456	139.87	2.14572	5.3962					77	140	34	10.7	6	81	46.7	107.5	258.9	6362	3.80359	0.01	16.27	4.79	0.680336	45.67	1.65963	2.68753					33	35	29	6.6	3.7	76.4	43.5
0	250	43	1	0	0	1	0	714	2.8537	1.8	0.01	205.27	2.31233	214.66	2.33175	3.4216					38	58	44	20.1	13.3	83.7	51.7	87.4	401.8	838	2.92324	2.66	0.01	163.15	2.21259	173.77	2.23997	0	4.48	5.09	109	1.59	58	82	35	14.1	8.8	79.7	47
0	251	39	1	0	0	1	0	882	2.94547	1.49	0.01	664.83	2.82271	194.16	2.28816	2.8704	4.73	5.07	153	1.66	22	26	21	21.8	15.3	80.2	46.7	80.3	472.9	170	2.23045	0.6	0.01	114.83	2.06006	144.54	2.15999	0	4.78	5.05	129	1.98	32	58	45	13.9	8.9	78	46.4
0	252	30	0	1	0	1	0	2633	3.42045	0.01	0.01	170.97	2.23292	105.18	2.02193	0	4.49	4.06	210	1.14	23	22	10	9.5	5.4	73.6	46.1				#NUM!				#NUM!		#NUM!	0
0	253	28	1	0		1		16500	4.21748	0.01	96.41	0.58	-0.236572	86.17	1.93536	0														10464	4.0197	0.01	101.52	0.52	-0.283997	191.36	2.28185	2.63949	2.36	5.07	126	1.01	49	82	114	9.6	5.2	82.8	45
0	254	30	1	0	0	0	0	7667	3.88463	0.01	0.11	2.19	0.340444	155.69	2.19226	0	3.58	5.07	101	1.26	33	42	20	13.2	8.5	75.3	44.5	115.6	327	2405	3.38112	0.01	0.04	1.58	0.198657	27.32	1.43648	0	3.17	4.49	73	0.82	54	73	32	18.3	11.7	70.9	45.2
0	255	43	1	1	0	1	0	430	2.63347	0.01	0.01	118.4	2.07335	34.43	1.53694	0					23	32	18	7.1	4.2	72.2	47.1			154	2.18752	0.01	0.01	136.58	2.13539	13.42	1.12775	0	2.38	4.84	105	1.07	29	46	75	9.5	5.1	73.1	44.9
0	256	42	1	1	0	1	0	529	2.72346	0.01	0.01	1.7	0.230449	8.12	0.909556	0	7.69	4.86	224	2.94	24	30	52	9.7	6.5	82.5	46.4	93.6	436		#NUM!				#NUM!		#NUM!	0
0	257	38	1	0	0	1	0		#NUM!				#NUM!		#NUM!	3.42651														56.77	1.75412	0.01	0.01	308.6	2.4894	316.04	2.49974	0	2.75	4.75	76	1.31	53	63	36	20.2	13.2	77.8	47.2
0	258	39	1	0	0	1	0	466	2.66839	0.01	1.2	2.18	0.338456	74.43	1.87175	1.83759	3.02	5.82	108	1.17	32	47	52	13.6	9.7	75.4	48.2			1.59	0.201397	6.87	0.65	3.92	0.593286	250.53	2.39886	0	2.82	5.41	118	0.99	57	70	186	14.3	8.5	74.7	49.3
0	259	50	0	0	0	1	0	5.03	0.701568	1.36	0.01	116.63	2.06681	39.26	1.59395	2.989					24	22	23	15	10.6	73	45.9				#NUM!				#NUM!		#NUM!	0
0	260	31	0	0	0	0	0	2885	3.46015	0.01	0.51	1.7	0.230449	43.67	1.64018	0	5.24	4.49	251	1.62	19	16	16	6.9	4.6	82.6	49.3	118.3	275.3	1060	3.02531	0.01	0.45	1.67	0.222716	120.04	2.07933	0	1.93	3.95	116	0.77	39	45	27	6.6	3.7	81	47.2
0	261	32	1	0	0	0	0	16500	4.21748	0.01	93.73	0.01	-2	108.16	2.03407	8	7.57	5.7	198	3.09	24	30	22	15.2	10.5	74.6	49.9	99.7	498.7	16500	4.21748	0.01	90.99	0.01	-2	46.66	1.66894	4.04139	3.29	5.01	131	1.34	48	61	69	12	5.9	70.1	45.1
0	262	44	1	1	0	1	0	13.2	1.12057	2.29			#NUM!		#NUM!	0														5.39	0.731589	0.23	0.01	148.67	2.17222	96.87	1.98619	0	4.34	4.8	4.8	1.77	21	0.19	19	19.4	12	75.8	46.6
0	264	39	1	1				1214	3.08422	0.01	0.01	341.8	2.53377	22.35	1.34928	0					16	18	15	7.7	4.3	78.1	46.6			675	2.8293	0.01	0.01	127.11	2.10418	3.57	0.552668	0	2.32	5.32	84	0.96	40	53	25	9.5	6.3	78.7	47.2
[truncated: 45 more columns]

## Sheet: codebook
Variable name	Meaning	Categorical variable
Response	Response at 48 weeks of treatment	1=response; 0=no response
id-48w	Serial Number
AGE	Age
SEX	Sex
NAs	Use Nucleos (t)ide Analogues or not	1=yes;0=no
Cirrhosis	With or without liver cirrhosis	1=yes;0=no
Fatty liver	With or without fatty liver	1=yes;0=no
Splenomegaly	With or without enlarged spleen	1=yes;0=no
HBsAg	Hepatitis B Surface Antigen (ng/mL) at baseline
LHBsAg	Hepatitis B Surface Antigen (log 10 ng/mL) at baseline
HBsAb	Hepatitis B Surface Antibody(mIU/mL) at baseline
HBeAg	Hepatitis B e Antigen (NcU/mL) at baseline
HBeAb	Hepatitis B e Antibody (NcU/mL) at baseline
LHBeAb	Hepatitis B e Antibody (log 10 NcU/mL) at baseline
HBcAb	Hepatitis B Core Antibody (NcU/mL) at baseline
LHBcAb	Hepatitis B Core Antibody (log 10 NcU/mL) at baseline
DNA	HBV DNA (log10 IU/mL) at baseline
WBC	White Blood Cell (10 ^12 /L) at baseline
RBC	Red Blood Cell (10 ^12 /L) at baseline
PLT	Platelet (10 ^9 /L) at baseline
LYM	Lymphocyte (10 ^9 /L) at baseline
AST	Aspartate Aminotransferase (U/L) at baseline
ALT	Alanine Aminotransferase (U/L) at baseline
Y-GT	Gamma-Glutamyl Transferase (U/L) at baseline
TBIL	Total Bilirubin (umol /L) at baseline
IBIL	Indirect Bilirubin (umol /L) at baseline
TP	Total Protein (g/L) at baseline
Alb	Albumin (g/L) at baseline
eGFR	Estimated Glomerular Filtration Rate (mL/min/1.73m²) at baseline
UA	Uric Acid (umol /L) at baseline
12HBsAg	Hepatitis B Surface Antigen (ng/mL) at 12 weeks
L12HBsAg	Hepatitis B Surface Antigen (log10 ng/mL) at 12 weeks
12HBsAb	Hepatitis B Surface Antibody(mIU/mL) at 12 weeks
12HBeAg	Hepatitis B e Antigen (NcU/mL) at 12 weeks
12HBeAb	Hepatitis B e Antibody (NcU/mL) at 12 weeks
L12HBeAb	Hepatitis B e Antibody (log10 NcU/mL) at 12 weeks
12HBcAb	Hepatitis B Core Antibody (NcU/mL) at 12 weeks
L12HBcAb	Hepatitis B Core Antibody (log10 NcU/mL) at 12 weeks
12HBV DNA	HBV DNA (log10 IU/mL) at 12 weeks
12WBC	White Blood Cell (10 ^12 /L) at 12 weeks
12RBC	Red Blood Cell (10 ^12 /L) at 12 weeks
12PLT	Platelet (10 ^9 /L) at 12 weeks
12LYM	Lymphocyte (10 ^9 /L) at 12 weeks
12AST	Aspartate Aminotransferase (U/L) at 12 weeks
12ALT	Alanine Aminotransferase (U/L) at 12 weeks
12Y-GT	Gamma-Glutamyl Transferase (U/L)at 12 weeks
12TBIL	Total Bilirubin (umol /L)at 12 weeks
12IBIL	Indirect Bilirubin (umol /L) at 12 weeks
12TP	Total Protein (g/L) at 12 weeks
12Alb	Albumin (g/L) at 12 weeks
12eGFR	Estimated Glomerular Filtration Rate (mL/min/1.73m²) at 12 weeks
12UA	Uric Acid (umol /L) at 12 weeks
24HBsAg	Hepatitis B Surface Antigen (ng/mL) at 24 weeks
L24HBsAg	Hepatitis B Surface Antigen (log10 ng/mL) at 24 weeks
24HBsAb	Hepatitis B Surface Antibody(mIU/mL) at 24 weeks
24HBeAg	Hepatitis B e Antibody (NcU/mL) at 24 weeks
24HBeAb	Hepatitis B e Antibody (NcU/mL) at 24 weeks
L24HBeAb	Hepatitis B e Antibody (log10 NcU/mL) at 24 weeks
24HBcAb	Hepatitis B Core Antibody (NcU/mL) at 24 weeks
L24HBcAb	Hepatitis B Core Antibody (log10 NcU/mL) at 24 weeks
24HBV DNA	HBV DNA (log10 IU/mL) at 24 weeks
24WBC	White Blood Cell (10 ^12 /L) at 24 weeks
24RBC	Red Blood Cell (10 ^12 /L) at 24 weeks
24PLT	Platelet (10 ^9 /L) at 24 weeks
24LYM	Lymphocyte (10 ^9 /L) at 24 weeks
24AST	Aspartate Aminotransferase (U/L) at 24 weeks
24ALT	Alanine Aminotransferase (U/L) at 24 weeks
24Y-GT	Gamma-Glutamyl Transferase (U/L)at 24 weeks
24TBIL	Total Bilirubin (umol /L)at 24 weeks
24IBIL	Indirect Bilirubin (umol /L) at 24 weeks
24TP	Total Protein (g/L) at 24 weeks
24Alb	Albumin (g/L) at 24 weeks
24eGFR	Estimated Glomerular Filtration Rate (mL/min/1.73m²) at 24 weeks
24UA	Uric Acid (umol /L) at 24 weeks
c12sAg	The change in HBsAg from week 12 to the baseline value
c24sAg	The change in HBsAg from week 24 to the baseline value
c12HBcAb	The change in HBcAb from week 12 to the baseline value
c24HBcAb	The change in HBcAb from week 24 to the baseline value
c12HBsAb	The change in HBsAb from week 12 to the baseline value
c12HBeAb	The change in HBeAb from week 12 to the baseline value
c12AST	The change in AST from week 12 to the baseline value
c12ALT	The change in ALT from week 12 to the baseline value
c12Y-GT	The change in Y-GT from week 12 to the baseline value
c12TBIL	The change in TBIL from week 12 to the baseline value
c12TP	The change in TP from week 12 to the baseline value
C12alb	The change in ALB from week 12 to the baseline value
c24HBsAb	The change in HBsAg from week 24 to the baseline value
c24HBeAb	The change in HBeAb from week 24 to the baseline value
c24HBcAB	The change in HBcAb from week 24 to the baseline value
c24AST	The change in AST from week 24 to the baseline value
c24ALT	The change in ALT from week 24 to the baseline value
c24GT	The change in GT from week 24 to the baseline value
c24TBIL	The change in TBIL from week 24 to the baseline value
c24TP	The change in TP from week 24 to the baseline value
c24ALB	The change in ALB from week 24 to the baseline value
